# Supplementary material for: Signature genomic traits of the core and accessory genome of Vibrio Cholerae O1 drive lineage transmission and disease severity
Source: Research Square preprint supplement (doi:10.21203/rs.3.rs-4184222/v1), 2024-04-05
Supplement: Supplementary file 4 [file 3228523d6dd81ad7ea278598.xlsx]

## Sheet: GSM
model iAM-Vc960
Vibrio cholerae Locus tag	Gene Name	Feature found in our cohort	Molecular function	Metabolic systems	Subsystems	Gene essentiality in rich media	Gene essentiality in minimal M9 media	Autotrophic behaviour	Essential gene on an alternatice carbon source	Significant in FVA analysis ( flux span across at least one reaction changes by >10% compared to wildtype )	Significant reactions from FVA analysis	Significant in FBA analysis (at least one metabolite yield=0, given that the yield >0 in wildtype)	Significant metabolites from FBA analysis
VC2699	dcuA	accessory	Responsible for the transport of C4-dicarboxylates	Transport	Transport//Electrochemical potential-driven transporters	not essential	not essential	N	N	N	-	N
VC2738	pckA	accessory	Involved in the gluconeogenesis	Carbohydrate Metabolism	Pyruvate metabolism, Glycolysis	not essential	not essential	N	N	Y	EX_23ccmp(e), EX_3cmp(e), EX_ala-D(e), EX_pi(e), 23CAMPtex, 23PDE7pp, 3HAD141, APG3PAT161, ASNNpp, ASPO3, ASPO4, ASPO5, ASPO6, ASPt2_3pp, CHLt2pp, COBALT2tex, DAAD, DSBCGT, DSBDR, DXPS, E4PD, EAR141x, EAR161x, EAR181x, FACOAE100, FACOAE160, G3PGtex, GALUi, GLUR, Ktex, LEUTAi, LIPOCT, LIPOS, LIPOt2pp, MNtex, MOHMT, NACtex, NACtpp, PNTK, PPCK, PTPATi, PYAM5PO, PYDXPP, QULNS, SHSL1, T2DECAI, UAMAGS,…	N
VC2751	add	core genome snp	Catalyzes the hydrolytic deamination of adenosine and 2-deoxyadenosine	Nucleotides Metabolism	Purine metabolism	not essential	not essential	N	N	Y	EX_dgmp(e), EX_dgsn(e), EX_orn(e), ACACT3r, ACACT4r, ADA, ADSL1r, ADSS, ALAR, ALATA_D2, ALATA_L, ALATA_L2, ASPO3, ASPO4, ASPO5, ASPO6, ASPt2_3pp, CHLt2pp, COBALT2tex, DAAD, DADA, DALAtex, DAMPtex, DHAD1, DINStex, DSBCGT, DSBDR, DXPS, E4PD, EAR141x, EAR161x, EAR181x, GALUi, GRTT, HISTD, HISTP, I2FE2SS2, ICYSDS, KARA1, MALCOAMT, MECDPDH5, MECDPS, MEPCT, MOHMT, NMNt7pp, NMNtex, OCDCAtexi, OCTNLL, PD…	N
VC0126	dapF	core genome snp	Catalyzes the stereoinversion of LL-2,6-diaminoheptanedioate (L,L-DAP) to meso-diaminoheptanedioate (meso-DAP), a precursor of L-lysine and an essential component of the bacterial peptidoglycan	Amino Acid Metabolism	Amino Acid Metabolism//Lysine biosynthesis	not essential	essential	autotrophy (Meso-2,6-Diaminoheptanedioate)	N	Y	EX_15dap(e), EX_dgmp(e), EX_gthox(e), EX_lys-L(e), ACACT3r, ACACT4r, ACLS, ALATA_D2, ALATA_L, ALATA_L2, ASPO3, ASPO4, ASPO5, ASPO6, ASPt2_3pp, ATPPRT, CADVtpp, CHLt2pp, DALAtex, DAMPtex, DAPDC, DAPE, DAPtex, DHBD, DHBSH, DHDPRy, DHDPS, DSBCGT, DSBDR, DXPS, E4PD, EAR141x, EAR161x, EAR181x, GALUi, HISTD, HISTP, HSST, I2FE2SS2, IPMD, IPPS, Ktex, LYSDC, LYSt3pp, LYStex, MALCOAMT, MOHMT, NACtex, PDX5P…	Y	36dahx[c], 4hba[c], hmfurn[c], 15dap[c], 26dap-M[c], 4crsol[c], LalaDgluMdap[c], LalaDgluMdapDala[c], anhgm3p[c], anhgm4p[c], anhm3p[c], anhm4p[c], lys-L[c], uaagmda[c], uagmda[c], ugmd[c], ugmda[c], um4p[c], 15dap[e], LalaDgluMdap[e], LalaDgluMdapDala[e], lys-L[e], 15dap[p], LalaDgluMdap[p], LalaDgluMdapDala[p], anhgm3p[p], anhgm4p[p], lys-L[p], murein3p3p[p], murein3px3p[p], murein3px4p[p], mur…
VC1494	pepN	core genome snp	Release of an N-terminal amino acid, Xaa-|-Yaa- from a peptide, amide or arylamide	Amino Acid Metabolism	Amino Acid Metabolism//Glutathione metabolism	not essential	not essential	N	N	N	-	N
VC1091	oppA	accessory	peptide transmembrane transporter activity	Cell Wall	ABC transporter/Quorum sensing	not essential	not essential	N	N	Y	EX_anhgm(e), 3HAD141, 3PEPTabcpp, 4PCPpp, ACACT3r, ACACT4r, ACLS, ACNML, AGM3PApp, AGM4PApp, AGMt2pp, ALAALAtex, ALATA_D2, ANHGMtex, ASNNpp, ASPO3, ASPO4, ASPO5, ASPO6, ASPt2_3pp, CHLt2pp, DALAtex, DHPS2, DSBCGT, DSBDR, DXPS, E4PD, EAR121x, EAR121y, EAR141x, EAR160y, EAR161x, EAR181x, FACOAE120, FACOAE140, GALUi, GLUR, GRTT, HISTD, HISTP, HSST, I4FE4SR, I4FE4ST, Ktex, MALCOAMT, METS, MOHMT, NMNt7…	N
VC2023	fabH1	core genome snp	Catalyzes the condensation reaction of fatty acid synthesis by the addition to an acyl acceptor of two carbons from malonyl-ACP.	Cofactor and Prosthetic Group Metabolism//Cell Wall	Fatty acid biosynthesis//Membrane lipid metabolism	not essential	not essential	N	N	N	-	N
VC2285	GGDEF family protein/CdgL	accessory	diguanylate cyclase activity		Biofilm formation - Vibrio cholerae	not essential	not essential	N	N	N	-	N
VC0468	gshB	core genome snp	Catalytic activity	Cofactor and Prosthetic Group Metabolism	Cysteine and methionine metabolism//Glutathione biosynthesis	not essential	not essential	N	N	Y	EX_4abut(e), EX_cgly(e), EX_glu-L(e), EX_gthrd(e), EX_hxa(e), EX_pi(e), 3HAD141, ABUTtex, ACACT2r, ACACT3r, ACACT4r, ACGAL1PPpp, ACGALtex, ACLS, ALATA_D2, ALATA_L, ALATA_L2, AMPTASECG, APG3PAT141, ASPO3, ASPO4, ASPO5, ASPO6, ASPt2_3pp, CGLYtex, CHLt2pp, CTECOAI6, CTECOAI7, DAAD, DALAtex, DGMPtex, DSBCGT, DSBDR, DXPS, E4PD, EAR141x, EAR161x, EAR181x, G2PP, G3PGtex, G3PIabcpp, G3PItex, GALUi, GLUCY…	Y	cgly[c], dgslnt[c], gslnt[c], gthox[c], gthrd[c], lgt-S[c], 4abut[e], cgly[e], glu-L[e], gthrd[e], 4abut[p], cgly[p], glu-L[p], gthrd[p]
