# Supplementary material for: Signature genomic traits of the core and accessory genome of Vibrio Cholerae O1 drive lineage transmission and disease severity
Source: Research Square preprint supplement (doi:10.21203/rs.3.rs-4184222/v1), 2024-04-05
Supplement: Supplementary file 5 [file 3541e5f34c8680b47644706b.xlsx]

## Sheet: GSM
model iAM-Vc960
Vibrio cholerae Locus tag	Gene name	Feature found in our cohort	molecular function	Systems	Subsystems	Gene essentiality in rich media	Gene essentiality in minimal M9 media	Autotrophic behaviour	Essential gene on an alternatice carbon source	Significant in FVA analysis ( flux span across at least one reaction changes by >10% compared to wildtype )	Significant reactions from FVA analysis	Significant in FBA analysis (at least one metabolite yield=0, given that the yield >0 in wildtype)	Significant metabolites from FBA analysis
VC0158	murI	Core SNP A137S	Provides the (R)-glutamate required for cell wall biosynthesis.	Cell wall	D-Amino acid metabolism	not essential	essential	auxotrophy (L-alanine-D-glutamate-meso-2,6-diaminoheptanedioate)	N	Y	DM_5DRIB, EX_15dap(e), EX_23camp(e), EX_4abut(e), EX_acald(e), EX_acgam(e), EX_acgam1p(e), EX_ade(e), EX_adn(e), EX_agm(e), EX_akg(e), EX_ala-L(e), EX_alaala(e), EX_anhgm(e), EX_arg-L(e), EX_cgly(e), EX_cmp(e), EX_co2(e), EX_cobalt2(e), EX_cys-L(e), EX_cytd(e), EX_dad-2(e), EX_dcmp(e), EX_dcyt(e), EX_dgsn(e), EX_dha(e), EX_etoh(e), EX_fe2(e), EX_fe3(e), EX_for(e), EX_fru(e), EX_glc-D(e), EX_gln-L…	Y	4hba[c], hmfurn[c], 4crsol[c], LalaDgluMdap[c], LalaDgluMdapDala[c], anhgm3p[c], anhgm4p[c], anhm3p[c], anhm4p[c], glu-D[c], uaagmda[c], uagmda[c], uamag[c], ugmd[c], ugmda[c], um4p[c], LalaDgluMdap[e], LalaDgluMdapDala[e], LalaDgluMdap[p], LalaDgluMdapDala[p], anhgm3p[p], anhgm4p[p], murein3p3p[p], murein3px3p[p], murein3px4p[p], murein4p3p[p], murein4p4p[p], murein4px4p[p], murein4px4p4p[p], mu…
VC2407	ftsI	Core SNP R491H	peptidoglycan glycosyltransferase activity	Cell wall	Peptidoglycan biosynthesis/beta-Lactam resistance	not essential	not essential	N	N	N	-	N	-
VC1571	appC	Core SNP A226T	heme binding//electron transfer activity	Energy metabolism	Oxidative phosphorylation/Two-component system	not essential	not essential	N	N	N	-	N	-
VC0745	suhB	Core SNP E217G	inositol monophosphate 3-phosphatase activity	Alternative Carbon Metabolism//Cell wall	Streptomycin biosynthesis/Inositol phosphate metabolism/Biosynthesis of secondary metabolites	not essential	not essential	N	N	N	-	N	-
VC0639	glmM	Core SNP R196L	phosphoglucosamine mutase activity	Cell wall	Amino sugar and nucleotide sugar metabolism/Biosynthesis of nucleotide sugars	not essential	essential	auxotrophy (UDP-N-acetyl-D-glucosamine and UDP-N-acetyl-D-galactosamine)		Y	DM_5DRIB, EX_15dap(e), EX_3amp(e), EX_4abut(e), EX_acald(e), EX_ade(e), EX_adn(e), EX_agm(e), EX_akg(e), EX_ala-D(e), EX_ala-L(e), EX_alaala(e), EX_arbtn(e), EX_arg-L(e), EX_cgly(e), EX_co2(e), EX_cobalt2(e), EX_cys-L(e), EX_cytd(e), EX_dad-2(e), EX_dha(e), EX_dimp(e), EX_din(e), EX_etoh(e), EX_fe2(e), EX_fe3(e), EX_fe3dcit(e), EX_for(e), EX_glc-D(e), EX_glcur1p(e), EX_gln-L(e), EX_glu-L(e), EX_g…	Y	4hba[c], hmfurn[c], 4crsol[c], LalaDgluMdap[c], LalaDgluMdapDala[c], acgam[c], acgam1p[c], acgam6p[c], acmanap[c], acmum6p[c], anhgm[c], anhgm3p[c], anhgm4p[c], anhm[c], anhm3p[c], anhm4p[c], gam1p[c], kdo2lipid4[c], kdo2lipid4L[c], kdolipid4[c], lipa[c], lipidA[c], lipidAds[c], lipidX[c], u23ga[c], u3aga[c], u3hga[c], uaagmda[c], uaccg[c], uacgam[c], uacmam[c], uacmamu[c], uagmda[c], uama[c], ua…
VC2701	dsbD	Core SNP T583I	protein-disulfide reductase (NAD(P)) activity	Transport	Trx reductase	not essential	not essential	N	N	N	-	N	-
VC1284	licH	Core SNP A56T	hydrolase activity, hydrolyzing O-glycosyl compounds	Carbohydrate Metabolism//Alternative Carbon Metabolism	Glycolysis / Gluconeogenesis/Starch and sucrose metabolism	not essential	not essential	N	N	N	-	N	-
VC1363	cysG_1	Core SNP V38A	ferrochelatase activity	Cofactor and Prosthetic Group Metabolism	Porphyrin metabolism/Biosynthesis of secondary metabolites/Biosynthesis of cofactors	essential	essential	N	essential on (R)-Propane-1,2-diol	Y	DM_5DRIB, EX_15dap(e), EX_23ccmp(e), EX_3cmp(e), EX_4abut(e), EX_acald(e), EX_acgam(e), EX_acgam1p(e), EX_ade(e), EX_adn(e), EX_agm(e), EX_akg(e), EX_anhgm(e), EX_arg-L(e), EX_cgly(e), EX_co2(e), EX_cys-L(e), EX_cytd(e), EX_dha(e), EX_dimp(e), EX_din(e), EX_etoh(e), EX_fe2(e), EX_fe3(e), EX_for(e), EX_glc-D(e), EX_glcn(e), EX_glu-L(e), EX_glyc(e), EX_gthrd(e), EX_h2o(e), EX_h2s(e), EX_hom-L(e), E…	Y	4hba[c], hmfurn[c], 4crsol[c], scl[c], sheme[c]
VC1509	cobB	Core SNP P50L	NAD-dependent histone deacetylase activity	Alternative Carbon Metabolism	Nicotinate and nicotinamide metabolism	not essential	not essential	N	N	N	-	N	-
VCA0526	clcA	Core SNP G104E	voltage-gated chloride channel activity	Inorganic Transport and Metabolism	Electrochemical potential-driven chloride ion transporters	essential	essential	N	essential on Deoxyadenosine	Y	DM_5DRIB, EX_15dap(e), EX_4abut(e), EX_acald(e), EX_acgal1p(e), EX_acgam(e), EX_acgam1p(e), EX_ade(e), EX_adn(e), EX_agm(e), EX_akg(e), EX_ala-D(e), EX_ala-L(e), EX_alaala(e), EX_anhgm(e), EX_arg-L(e), EX_cgly(e), EX_co2(e), EX_cobalt2(e), EX_cys-L(e), EX_cytd(e), EX_dad-2(e), EX_dha(e), EX_din(e), EX_etoh(e), EX_fe2(e), EX_fe3(e), EX_fe3dhbzs(e), EX_for(e), EX_g1p(e), EX_g3pc(e), EX_g3pg(e), EX_…	N	-
VC2642	argG	Core SNP T283A	argininosuccinate synthase activity//ATP binding	Amino Acid Metabolism	Arginine biosynthesis/Alanine, aspartate and glutamate metabolism/Biosynthesis of secondary metabolites/Biosynthesis of amino acids	not essential	not essential	N	N	Y	DM_5DRIB, EX_23camp(e), EX_4abut(e), EX_LalaDgluMdap(e), EX_LalaDgluMdapDala(e), EX_acald(e), EX_acgam(e), EX_acgam1p(e), EX_ade(e), EX_adn(e), EX_agm(e), EX_akg(e), EX_anhgm(e), EX_arg-L(e), EX_cgly(e), EX_co2(e), EX_cys-L(e), EX_cytd(e), EX_dcyt(e), EX_dha(e), EX_etoh(e), EX_fe2(e), EX_fe3(e), EX_fe3dcit(e), EX_for(e), EX_glc-D(e), EX_glu-L(e), EX_glyc(e), EX_gmp(e), EX_gsn(e), EX_gthox(e), EX_…	N	-
VC0270	Mak	Core SNP G116R	hexokinase activity	Alternative Carbon Metabolism	Amino sugar and nucleotide sugar metabolism/Fructose and mannose metabolism	not essential	not essential	N	N	Y	DM_5DRIB, EX_15dap(e), EX_23camp(e), EX_4abut(e), EX_LalaDgluMdap(e), EX_LalaDgluMdapDala(e), EX_acald(e), EX_acgam(e), EX_acgam1p(e), EX_ade(e), EX_adn(e), EX_agm(e), EX_akg(e), EX_anhgm(e), EX_cgly(e), EX_co2(e), EX_cys-L(e), EX_cytd(e), EX_dcyt(e), EX_dha(e), EX_etoh(e), EX_fe2(e), EX_fe3(e), EX_for(e), EX_fru(e), EX_glc-D(e), EX_glu-L(e), EX_glyc(e), EX_gmp(e), EX_gsn(e), EX_gthox(e), EX_h2o(…	Y	kdo2lipid4L[c], kdo2lipid4[p]
VCA0828	phhA	Core SNP Q44L	iron ion binding//phenylalanine 4-monooxygenase activity	Amino Acid Metabolism	Phenylalanine metabolism/Phenylalanine, tyrosine and tryptophan biosynthesis/Folate biosynthesis/Biosynthesis of amino acids	not essential	not essential	N	N	N	-	N	-
VC0819	adh	accessory	aldehyde dehydrogenase (NAD+) activity	Amino Acid Metabolism//Nucleotides Metabolism//Carbohydrate metabolism	Glycolysis / Gluconeogenesis/Fatty acid degradation/Valine, leucine and isoleucine degradation/Lysine degradation/Arginine and proline metabolism/Histidine metabolism/Tryptophan metabolism/beta-Alanine metabolism/Glycerolipid metabolism/Folate metabolism/Pyruvate metabolism/Chloroalkane and chloroalkene degradation/Pantothenate and CoA biosynthesis	essential	essential	N	essential on 3-(3-hydroxy-phenyl)propionate, Dihydroxyacetone, Raffinose and (R)-Propane-1,2-diol	Y	DM_5DRIB, EX_15dap(e), EX_3amp(e), EX_3cmp(e), EX_4abut(e), EX_LalaDgluMdap(e), EX_LalaDgluMdapDala(e), EX_acald(e), EX_acgam(e), EX_acgam1p(e), EX_ade(e), EX_adn(e), EX_agm(e), EX_akg(e), EX_ala-D(e), EX_anhgm(e), EX_arg-L(e), EX_asn-L(e), EX_cgly(e), EX_cmp(e), EX_co2(e), EX_cys-L(e), EX_cytd(e), EX_dgsn(e), EX_dha(e), EX_din(e), EX_etoh(e), EX_fe2(e), EX_fe3(e), EX_for(e), EX_gam6p(e), EX_glc-…	N	-
VC0126	dapF	synonymous snp	Catalyzes the stereoinversion of LL-2,6-diaminoheptanedioate (L,L-DAP) to meso-diaminoheptanedioate (meso-DAP)	Amino Acid Metabolism	Lysine biosynthesis//superpathway of L-lysine, L-threonine and L-methionine biosynthesis I // L-lysine biosynthesis I	not essential	essential	auxotrophy (L tryptophan)	N	Y	DM_5DRIB, EX_15dap(e), EX_23camp(e), EX_4abut(e), EX_LalaDgluMdap(e), EX_LalaDgluMdapDala(e), EX_acald(e), EX_acgam(e), EX_acgam1p(e), EX_ade(e), EX_adn(e), EX_agm(e), EX_akg(e), EX_anhgm(e), EX_arg-L(e), EX_cgly(e), EX_co2(e), EX_cys-L(e), EX_cytd(e), EX_dcyt(e), EX_dha(e), EX_dtmp(e), EX_etoh(e), EX_fe2(e), EX_fe3(e), EX_fe3dcit(e), EX_for(e), EX_glc-D(e), EX_glu-L(e), EX_glyc(e), EX_gmp(e), EX…	Y	23dhba[c], 3ophb[c], LalaDgluMdapDala[c]
VC2751	add	Core SNP synonymous snp	2'-deoxyadenosine deaminase activity	Nucleotides Metabolism	Purine metabolism//superpathway of purine deoxyribonucleosides degradation // purine ribonucleosides degradation // purine nucleotides degradation II (aerobic) // purine deoxyribonucleosides degradation I // adenosine nucleotides degradation II // adenine and adenosine salvage V // adenine and adenosine salvage III	not essential	not essential	N	N	Y	DM_5DRIB, EX_15dap(e), EX_23camp(e), EX_4abut(e), EX_LalaDgluMdap(e), EX_LalaDgluMdapDala(e), EX_acald(e), EX_acgam(e), EX_acgam1p(e), EX_ade(e), EX_adn(e), EX_agm(e), EX_akg(e), EX_anhgm(e), EX_arg-L(e), EX_cgly(e), EX_co2(e), EX_cys-L(e), EX_cytd(e), EX_dcyt(e), EX_dha(e), EX_etoh(e), EX_fe2(e), EX_fe3(e), EX_fe3dcit(e), EX_for(e), EX_glc-D(e), EX_glu-L(e), EX_glyc(e), EX_gmp(e), EX_gsn(e), EX_…	N	-
VC0468	gshB	Core SNP T93I	glutathione synthase activity	Cofactor and Prosthetic Group Metabolism	Cysteine and methionine metabolism//Glutathione biosynthesis	not essential	not essential	N	N	N	-	N	-
VCA0765	mcrC	accessory	L-allo-threonine aldolase activity	Amino Acid Metabolism//Cofactor and Prosthetic Group Metabolism	Glycine, serine and threonine metabolism//L-threonine degradation IV	essential	essential	N	essential on O-Phospho-L-serine	Y	DM_5DRIB, EX_15dap(e), EX_23camp(e), EX_4abut(e), EX_LalaDgluMdap(e), EX_LalaDgluMdapDala(e), EX_acald(e), EX_acgam(e), EX_acgam1p(e), EX_ade(e), EX_adn(e), EX_agm(e), EX_akg(e), EX_anhgm(e), EX_arg-L(e), EX_cgly(e), EX_co2(e), EX_cys-L(e), EX_cytd(e), EX_dcyt(e), EX_dha(e), EX_etoh(e), EX_fe2(e), EX_fe3(e), EX_fe3dcit(e), EX_for(e), EX_glc-D(e), EX_glu-L(e), EX_glyc(e), EX_gmp(e), EX_gsn(e), EX_…	N	-
