# Supplementary material for: Signature genomic traits of the core and accessory genome of Vibrio Cholerae O1 drive lineage transmission and disease severity
Source: Research Square preprint supplement (doi:10.21203/rs.3.rs-4184222/v1), 2024-04-05
Supplement: Supplementary file 6 [file 5c966499c49b373483b6fe9a.xlsx]

## Sheet: wholecountriesmetadata
Sample ID	EBI-ENA/NCBI Accession	Isolation	Year	Lineage	Cohort
4660	ERR018117	Bangladesh	1994	BD-0	Public
4670	ERR019883	Bangladesh	1991	BD-0	Public
4672	ERR019884	Bangladesh	2000	BD-0	Public
00/75	ERR2008433	Mexico	2000	LAT-2	Public
00/79	ERR2008414	Mexico	2000	LAT-2	Public
00/84	ERR2008434	Mexico	2000	LAT-2	Public
00/92	ERR2008412	Mexico	2000	LAT-2	Public
1_1970	ERR042745	Israel	1970		Public
12_1970	ERR042749	Israel	1970		Public
1283_CDC	ERR579088	China	1984		Public
129_CDC	ERR579311	China	1994		Public
147_CDC	ERR579085	China	2002		Public
1525_CDC	ERR579986	China	1994		Public
1551_CDC	ERR579083	China	1979		Public
1575_CDC	ERR579082	China	1990		Public
1583_CDC	ERR579081	China	1991		Public
1593_CDC	ERR579080	China	1992		Public
1605_CDC	ERR579079	China	1993		Public
1627_CDC	ERR579078	China	1997		Public
169_12	ERR164765	Zambia	2003	T10	Public
1909_CDC	ERR579077	China	1998		Public
1944_CDC	ERR579076	China	2000		Public
200106_CDC	ERR579313	China	2001		Public
2006/2004	ERR163247	Mexico	2004	LAT-1	Public
2308_CDC	ERR579074	China	1978		Public
2530_CDC	ERR579073	China	1996		Public
2578_CDC	ERR579919	China	1985		Public
2580_CDC	ERR579070	China	1989		Public
2605_CDC	ERR579069	China	1998		Public
2657_CDC	ERR579068	China	1995		Public
2710_CDC	ERR579067	China	1986		Public
2744_CDC	ERR579066	China	1962		Public
2752_CDC	ERR579065	China	1981		Public
2757_CDC	ERR579064	China	1987		Public
2833_CDC	ERR579062	China	1979		Public
2848_CDC	ERR579061	China	1988		Public
2865_CDC	ERR579060	China	1961		Public
2873_CDC	ERR579059	China	1961		Public
2881_CDC	ERR579058	China	1961		Public
2894_CDC	ERR579057	China	1961		Public
2914_CDC	ERR579056	China	1966		Public
2921_CDC	ERR579055	China	1962		Public
2957_CDC	ERR579054	China	1964		Public
2981_CDC	ERR579053	China	1965		Public
3014_CDC	ERR579052	China	1969		Public
3024_CDC	ERR579051	China	1973		Public
3075_CDC	ERR579050	China	1974		Public
3270_CDC	ERR579049	China	1977		Public
3289_CDC	ERR577143	China	1978		Public
3304_CDC	ERR577142	China	1979		Public
3497_CDC	ERR577141	China	1980		Public
3538_CDC	ERR577140	China	1981		Public
3564_CDC	ERR577139	China	1982		Public
3595_CDC	ERR576996	China	1983		Public
3626_CDC	ERR576995	China	1983		Public
3633_CDC	ERR576988	China	1984		Public
3735_CDC	ERR576987	China	1988		Public
4_1970	ERR042748	Israel	1970		Public
4039_CDC	ERR576986	China	1993		Public
4070_CDC	ERR576985	China	1994		Public
4210_CDC	ERR576984	China	1999		Public
6310_CDC	ERR576983	Indonesia	1961		Public
6311_CDC	ERR576982	Indonesia	1961		Public
6312_CDC	ERR576981	Indonesia	1961		Public
63244_CDC	ERR576980	China	1963		Public
642345_CDC	ERR576979	China	1964		Public
863_CDC	ERR576978	Mauritania	1986	T1	Public
9_CDC	ERR579309	China	2001		Public
91/02	ERR2008340	Mexico	1991	LAT-2	Public
91/21811	ERR2008347	Mexico	1991	LAT-2	Public
91/2526	ERR2008343	Mexico	1991	LAT-2	Public
91/2589	ERR2008344	Mexico	1991	LAT-2	Public
91/285	ERR2008341	Mexico	1991	LAT-2	Public
91/5545	ERR2008345	Mexico	1991	LAT-2	Public
91/570	ERR2008342	Mexico	1991	LAT-2	Public
92/14370	ERR2008348	Mexico	1992	LAT-2	Public
92/14800	ERR2008349	Mexico	1992	LAT-2	Public
92/15268	ERR2008350	Mexico	1992	LAT-2	Public
92/17909	ERR2008358	Mexico	1992	LAT-2	Public
92/18238	ERR2008359	Mexico	1992	LAT-2	Public
92/18257	ERR2008360	Mexico	1992	LAT-2	Public
92/18282	ERR2008361	Mexico	1992	LAT-2	Public
92/20547	ERR2008362	Mexico	1992	LAT-2	Public
92/25585	ERR2008363	Mexico	1992	LAT-2	Public
92/33213	ERR2008364	Mexico	1992	LAT-2	Public
93/34318	ERR2008365	Mexico	1993	LAT-2	Public
93/34347	ERR2008366	Mexico	1993	LAT-2	Public
93/34569	ERR2008386	Mexico	1993	LAT-2	Public
93/38850	ERR2008387	Mexico	1993	LAT-2	Public
93/40130	ERR2008388	Mexico	1993	LAT-2	Public
93/45433	ERR2008389	Mexico	1993	LAT-2	Public
93/45551	ERR2008390	Mexico	1993	LAT-2	Public
93/50810	ERR2008391	Mexico	1993	LAT-2	Public
93284_CDC	ERR576977	China	1993		Public
936_CDC	ERR576976	China	1998		Public
94/56235	ERR2008392	Mexico	1994	LAT-2	Public
94/57121	ERR2008393	Mexico	1994	LAT-2	Public
94/57122	ERR2008394	Mexico	1994	LAT-2	Public
94/57250	ERR2008395	Mexico	1994	LAT-2	Public
94/58806	ERR2008396	Mexico	1994	LAT-2	Public
94/58900	ERR2008397	Mexico	1994	LAT-2	Public
95/67202	ERR2008398	Mexico	1995	LAT-2	Public
95/67203	ERR2008402	Mexico	1995	LAT-2	Public
95/67800	ERR2008399	Mexico	1995	LAT-2	Public
95/68626	ERR2008400	Mexico	1995	LAT-2	Public
95/68743	ERR2008401	Mexico	1995	LAT-2	Public
95/69769	ERR2008403	Mexico	1995	LAT-2	Public
95/69779	ERR2008404	Mexico	1995	LAT-2	Public
95/71490	ERR2008405	Mexico	1995	LAT-2	Public
95/72066	ERR2008406	Mexico	1995	LAT-2	Public
95/75918	ERR2008407	Mexico	1995	LAT-2	Public
95/80045	ERR2008408	Mexico	1995	LAT-2	Public
95/84050	ERR2008409	Mexico	1995	LAT-2	Public
956_CDC	ERR576975	China	2001		Public
96/1250	ERR2008418	Mexico	1996	LAT-2	Public
96/2152	ERR2008410	Mexico	1996	LAT-2	Public
96/2218	ERR2008421	Mexico	1996	LAT-2	Public
96/2440	ERR2008411	Mexico	1996	LAT-2	Public
97/266	ERR2008419	Mexico	1997	LAT-2	Public
97/3144	ERR2008425	Mexico	1997	LAT-2	Public
97/3347	ERR2008426	Mexico	1997	LAT-2	Public
97/3594	ERR2008420	Mexico	1997	LAT-2	Public
97/586	ERR2008746	Mexico	1997	LAT-2	Public
97/695	ERR2008423	Mexico	1997	LAT-2	Public
97/696	ERR2008424	Mexico	1997	LAT-2	Public
97/7432	ERR2008751	Mexico	1997	LAT-2	Public
98/1236	ERR2008752	Mexico	1998	LAT-2	Public
98/160	ERR2008748	Mexico	1998	LAT-2	Public
98/1980	ERR2008413	Mexico	1998	LAT-2	Public
98/2407	ERR2008430	Mexico	1998	LAT-2	Public
98/2754c	ERR2008750	Mexico	1998	LAT-2	Public
98/749c	ERR2008749	Mexico	1998	LAT-2	Public
99/52C	ERR2008352	Mexico	1999	LAT-2	Public
99/838	ERR2008353	Mexico	1999	LAT-2	Public
A10	ERR025383	Bangladesh	1979	L2	Public
A109	ERR018147		1990	L2	Public
A130	ERR018154	India	1989	L2	Public
A131	ERR018153	India	1989	L2	Public
A152	ERR018152	Mozambique	1991	T1	Public
A154	ERR018151	Mozambique	1991	T1	Public
A155	ERR018150	Mozambique	1991	T1	Public
A177	ERR018149	Colombia	1992	T2	Public
A18	ERR025384	India	1977	L2	Public
A180	ERR018148	Colombia	1992	T2	Public
A184	ERR018146	Colombia	1992	T2	Public
A185	ERR018156	Colombia	1992	T2	Public
A19	ERR025385	Bangladesh	1971	L2	Public
A193	ERR018160	Bolivia	1992	T2	Public
A200	ERR018168	Argentina	1992	T2	Public
A201	ERR018167	Argentina	1992	T2	Public
A231	ERR018161	Mexico	1991	T2	Public
A231	ERR018161	Mexico	1991	T2	Public
A232	ERR018159	Mexico	1991	T2	Public
A232	ERR018159	Mexico	1991	T2	Public
A241	ERR018169	Vietnam	1989	L2	Public
A245	ERR018171	Vietnam	1989	L2	Public
A27	ERR025378	Peru	1991	T2	Public
A29	ERR025388	Peru	1991	T2	Public
A31	ERR025389	Peru	1991	T2	Public
A316	ERR018181	Argentina	1993	T2	Public
A32	ERR025390	Peru	1991	T2	Public
A330	ERR018119	India	1993	L2	Public
A346_1	ERR025392	Bangladesh	1994		Public
A346_1	ERR025392	Bangladesh	1994	BD-0	Public
A346_2	ERR018179	Bangladesh	1994		Public
A346_2	ERR018179	Bangladesh	1994	BD-0	Public
A383	ERR018121	Bangladesh	2002	L2	Public
A390	ERR018177	Argentina	1987	L2	Public
A397	ERR018176	Bangladesh	1987	L2	Public
A4	ERR025380		1973	L2	Public
A4	ERR025380		1973	L2	Public
A481	ERR018175	Djibouti	2007	T10	Public
A482	ERR018174	Djibouti	2007	T10	Public
A483	ERR018172	Djibouti	2007	T10	Public
A487_1	ERR025395	Bangladesh	2007		Public
A487_2	ERR018182	Bangladesh	2007		Public
A488_1	ERR025393	Bangladesh	2006		Public
A488_2	ERR018128	Bangladesh	2006		Public
A5	ERR025381	Angola	1989	T1	Public
A6	ERR025382	Indonesia	1957	L2	Public
AHV1003_CDC	ERR576974	China	2010		Public
BCH-00965	DRR069049	India	2010	IND-1	Public
BCH-01350	DRR069052	India	2011	IND-2	Public
BCH-01451	DRR069054	India	2011	IND-2	Public
BCH-01536	DRR069055	India	2011	IND-2	Public
BCH-01776	DRR069058	India	2011	IND-2	Public
BCH-02282	DRR069063	India	2012	IND-2	Public
BCH-03152	DRR069074	India	2013	IND-2	Public
BCH-03300	DRR069077	India	2013	IND-2	Public
BCH-03380	DRR069079	India	2013	IND-2	Public
BCH-04023	DRR069081	India	2014	IND-2	Public
BCH-04620	DRR069084	India	2014	IND-2	Public
BCH-04818	DRR069086	India	2014	IND-2	Public
BGD004	DRR335607	Bangladesh	2007	BD-1	Public
BGD005	DRR335608	Bangladesh	2007	BD-2	Public
BGD006	DRR335609	Bangladesh	2007	BD-1	Public
BGD007	DRR335610	Bangladesh	2007	BD-1.1	Public
BGD008	DRR335611	Bangladesh	2007	BD-1.1	Public
BGD009	DRR335612	Bangladesh	2007	BD-1	Public
BGD010	DRR335613	Bangladesh	2007	BD-1	Public
BGD011	DRR335614	Bangladesh	2007	BD-1.1	Public
BGD012	DRR335615	Bangladesh	2007	BD-1	Public
BGD013	DRR335616	Bangladesh	2007	BD-1	Public
BGD014	DRR335617	Bangladesh	2007	BD-1	Public
BGD015	DRR335618	Bangladesh	2007	BD-1.1	Public
BGD016	DRR335619	Bangladesh	2008	BD-1.1	Public
BGD018	DRR335620	Bangladesh	2008	BD-1.1	Public
BGD019	DRR335621	Bangladesh	2008	BD-1.1	Public
BGD020	DRR335622	Bangladesh	2008	BD-1.1	Public
BGD022	DRR335624	Bangladesh	2008	BD-1.1	Public
BGD023	DRR335625	Bangladesh	2008	BD-1.1	Public
BGD024	DRR335626	Bangladesh	2008	BD-1.1	Public
BGD025	DRR335627	Bangladesh	2008	BD-1.1	Public
BGD026	DRR189307	Bangladesh	2009	BD-2	Public
BGD029	DRR335628	Bangladesh	2009	BD-2	Public
BGD030	DRR335629	Bangladesh	2009	BD-2	Public
BGD031	DRR335630	Bangladesh	2009	BD-2	Public
BGD032	DRR335631	Bangladesh	2009	BD-2	Public
BGD033	DRR335632	Bangladesh	2009	BD-2	Public
BGD034	DRR335633	Bangladesh	2009	BD-2	Public
BGD035	DRR335634	Bangladesh	2009	BD-2	Public
BGD036	DRR189346	Bangladesh	2010	BD-2	Public
BGD037	DRR335635	Bangladesh	2010	BD-1.1	Public
BGD038	DRR335636	Bangladesh	2010	BD-1.1	Public
BGD039	DRR335637	Bangladesh	2010	BD-1.1	Public
BGD040	DRR335638	Bangladesh	2010	BD-1.1	Public
BGD041	DRR335639	Bangladesh	2010	BD-1.1	Public
BGD042	DRR335640	Bangladesh	2010	BD-1.1	Public
BGD043	DRR189347	Bangladesh	2010	BD-1	Public
BGD044	DRR335641	Bangladesh	2010	BD-1.1	Public
BGD045	DRR335642	Bangladesh	2010	BD-1.1	Public
BGD046	DRR335643	Bangladesh	2010	BD-2	Public
BGD047	DRR335644	Bangladesh	2010	BD-1.1	Public
BGD048	DRR335645	Bangladesh	2010	BD-1.1	Public
BGD049	DRR335646	Bangladesh	2010	BD-1.1	Public
BGD050	DRR189310	Bangladesh	2011	BD-1	Public
BGD051	DRR335647	Bangladesh	2011	BD-1.1	Public
BGD052	DRR335648	Bangladesh	2011	BD-1.1	Public
BGD053	DRR335649	Bangladesh	2011	BD-1.1	Public
BGD056	DRR189311	Bangladesh	2011	BD-1	Public
BGD057	DRR189313	Bangladesh	2011	BD-1	Public
BGD058	DRR189314	Bangladesh	2011	BD-1	Public
BGD060	DRR189308	Bangladesh	2012	BD-1	Public
BGD061	DRR335650	Bangladesh	2012	BD-1.1	Public
BGD064	DRR335651	Bangladesh	2012	BD-1.1	Public
BGD065	DRR189309	Bangladesh	2012	BD-1	Public
BGD066	DRR335652	Bangladesh	2012	BD-1.1	Public
BGD067	DRR189312	Bangladesh	2012	BD-1	Public
BGD068	DRR335653	Bangladesh	2012	BD-1.1	Public
BGD070	DRR189315	Bangladesh	2013	BD-2	Public
BGD071	DRR335654	Bangladesh	2013	BD-2	Public
BGD072	DRR189316	Bangladesh	2013	BD-2	Public
BGD073	DRR335655	Bangladesh	2013	BD-2	Public
BGD074	DRR335656	Bangladesh	2013	BD-2	Public
BGD075	DRR335657	Bangladesh	2013	BD-2	Public
BGD076	DRR189317	Bangladesh	2013	BD-2	Public
BGD077	DRR189318	Bangladesh	2013	BD-2	Public
BGD078	DRR335658	Bangladesh	2013	BD-2	Public
BGD079	DRR189320	Bangladesh	2013	BD-2	Public
BGD080	DRR335659	Bangladesh	2013	BD-2	Public
BGD081	DRR335660	Bangladesh	2013	BD-2	Public
BGD082	DRR189326	Bangladesh	2013	BD-2	Public
BGD083	DRR335661	Bangladesh	2013	BD-2	Public
BGD084	DRR189319	Bangladesh	2013	BD-2	Public
BGD085	DRR335662	Bangladesh	2014	BD-2	Public
BGD086	DRR189321	Bangladesh	2014	BD-2	Public
BGD087	DRR189322	Bangladesh	2014	BD-2	Public
BGD088	DRR189323	Bangladesh	2014	BD-2	Public
BGD089	DRR189324	Bangladesh	2014	BD-2	Public
BGD090	DRR335663	Bangladesh	2014	BD-2	Public
BGD091	DRR189325	Bangladesh	2014	BD-2	Public
BGD093	DRR335664	Bangladesh	2014	BD-2	Public
BGD094	DRR189327	Bangladesh	2014	BD-2	Public
BGD095	DRR189328	Bangladesh	2014	BD-2	Public
BGD096	DRR189329	Bangladesh	2014	BD-2	Public
BGD097	DRR335665	Bangladesh	2014	BD-2	Public
BGD098	DRR189330	Bangladesh	2014	BD-2	Public
BGD099	DRR335666	Bangladesh	2014	BD-2	Public
BGD104	DRR189276	Bangladesh	2009	BD-2	Public
BGD105	DRR189277	Bangladesh	2009	BD-2	Public
BGD106	DRR335667	Bangladesh	2009	BD-2	Public
BGD107	DRR189278	Bangladesh	2009	BD-1	Public
BGD108	DRR335668	Bangladesh	2009	BD-2	Public
BGD109	DRR189279	Bangladesh	2009	BD-2	Public
BGD110	DRR189280	Bangladesh	2010	BD-1	Public
BGD111	DRR189281	Bangladesh	2010	BD-1	Public
BGD112	DRR335669	Bangladesh	2010	BD-1.1	Public
BGD113	DRR189282	Bangladesh	2010	BD-1	Public
BGD114	DRR189283	Bangladesh	2011	BD-1	Public
BGD115	DRR335670	Bangladesh	2011	BD-1.1	Public
BGD116	DRR189284	Bangladesh	2011	BD-1	Public
BGD117	DRR189285	Bangladesh	2011	BD-2	Public
BGD118	DRR189286	Bangladesh	2012	BD-2	Public
BGD119	DRR189287	Bangladesh	2012	BD-2	Public
BGD120	DRR189288	Bangladesh	2012	BD-2	Public
BGD121	DRR189289	Bangladesh	2012	BD-2	Public
BGD122	DRR189290	Bangladesh	2013	BD-2	Public
BGD123	DRR335671	Bangladesh	2013	BD-2	Public
BGD124	DRR189291	Bangladesh	2014	BD-2	Public
BGD125	DRR335672	Bangladesh	2014	BD-1.1	Public
BGD126	DRR189292	Bangladesh	2015	BD-1	Public
BGD127	DRR335673	Bangladesh	2015	BD-2	Public
BGD128	DRR189293	Bangladesh	2015	BD-2	Public
BGD130	DRR189294	Bangladesh	2015	BD-2	Public
BGD131	DRR335674	Bangladesh	2015	BD-2	Public
BGD133	DRR189296	Bangladesh	2015	BD-2	Public
BGD134	DRR335675	Bangladesh	2015	BD-2	Public
BGD135	DRR335676	Bangladesh	2015	BD-2	Public
BGD136	DRR189297	Bangladesh	2015	BD-2	Public
BGD137	DRR189298	Bangladesh	2016	BD-1	Public
BGD138	DRR189299	Bangladesh	2016	BD-2	Public
BGD139	DRR189300	Bangladesh	2016	BD-2	Public
BGD140	DRR189301	Bangladesh	2016	BD-2	Public
BGD141	DRR189302	Bangladesh	2016	BD-2	Public
BGD143	DRR189303	Bangladesh	2016	BD-2	Public
BGD144	DRR335677	Bangladesh	2016	BD-2	Public
BGD145	DRR335678	Bangladesh	2016	BD-2	Public
BGD146	DRR189304	Bangladesh	2016	BD-2	Public
BGD147	DRR335679	Bangladesh	2016	BD-2	Public
BGD148	DRR189305	Bangladesh	2016	BD-2	Public
BGD149	DRR189306	Bangladesh	2016	BD-2	Public
BGD150	DRR335680	Bangladesh	2017	BD-2	Public
BGD151	DRR335681	Bangladesh	2017	BD-2	Public
BGD152	DRR335682	Bangladesh	2017	BD-2	Public
BGD153	DRR335683	Bangladesh	2017	BD-2	Public
BGD154	DRR335684	Bangladesh	2017	BD-2	Public
BGD155	DRR335685	Bangladesh	2017	BD-2	Public
BGD156	DRR335686	Bangladesh	2017	BD-2	Public
BGD157	DRR335687	Bangladesh	2017	BD-2	Public
BGD158	DRR335688	Bangladesh	2017	BD-2	Public
BGD159	DRR335689	Bangladesh	2017	BD-2	Public
BGD160	DRR335690	Bangladesh	2017	BD-2	Public
C6706_CDC	ERR576973	Peru	1991	LAT-1	Public
C8798	ERR1877619	Uganda	1992	T1	Public
CNRVC000060	ERR976593	Madagascar	2000	T10	Public
CNRVC010055	ERR1877940	Madagascar	2001	T10	Public
CNRVC010062	ERR1877942	Burundi	2001	T10	Public
CNRVC010108	ERR1877944	Togo	2001	T9	Public
CNRVC010203	ERR1877947	Chad	2001	T9	Public
CNRVC010254	ERR1877952	Congo	2001	T10	Public
CNRVC030391	ERR1878094	Somalia	2003	T6	Public
CNRVC030438	ERR1878096	Iraq	2003		Public
CNRVC030477	ERR1878099	Liberia	2003	T9	Public
CNRVC030594	ERR1878104	Comoros	2003	T10	Public
CNRVC040061	ERR1878105	Cameroon	2004	T9	Public
CNRVC040127	ERR1878109	Benin	2004	T9	Public
CNRVC040303	ERR1878117	Senegal	2004	T9	Public
CNRVC050073	ERR1878131	Equatorial Guinea	2005	T9	Public
CNRVC050280	ERR1878135	Pakistan	2005		Public
CNRVC060010	ERR1878150	Mali	2005	T9	Public
CNRVC060153	ERR1878155	Congo	2006	T10	Public
CNRVC070012	ERR1878550	Congo	2007	T9	Public
CNRVC070142	ERR1878558	Mauritania	2006	T9	Public
CNRVC070154	ERR1878560	Algeria	1994	T8	Public
CNRVC070316	ERR1878562	Burkina Faso	2005	T9	Public
CNRVC080122	ERR1878565	Niger	2008	T9	Public
CNRVC080383	ERR1878569	Sudan	2008	T10	Public
CNRVC090123	ERR1878575	Pakistan	2009		Public
CNRVC090143	ERR1878576	Pakistan	2009		Public
CNRVC090144	ERR1878577	Pakistan	2009		Public
CNRVC090175	ERR1878578	Nigeria	2009	T12	Public
CNRVC100246	ERR1878591	Chad	2010	T12	Public
CNRVC110096	ERR1878595	Cameroon	2010	T12	Public
CNRVC110113	ERR1878596	Cameroon	2011	T12	Public
CNRVC110241	ERR1878600	Chad	2011	T12	Public
CNRVC110272	ERR1878603	Central African Republic	2011	T10	Public
CNRVC140012	ERR1878607	Congo	2014	T10	Public
CNRVC140117	ERR976488	Bolivia	1991	T2	Public
CNRVC140118	ERR976489	Brazil	1991	T2	Public
CNRVC140125	ERR976496	Bolivia	1992	T2	Public
CNRVC140134	ERR976505	Portugal	1971		Public
CNRVC140135	ERR976506	Portugal	1971		Public
CNRVC140136	ERR976507	Portugal	1971		Public
CNRVC150131	ERR1878613	Ukraine	1970		Public
CNRVC150132	ERR1878614	Ukraine	1974		Public
CNRVC150134	ERR1878616	Russian Federation	1990		Public
CNRVC150216	ERR1879390	Turkey	1976		Public
CNRVC150218	ERR1879392	Ethiopia	1985	T4	Public
CNRVC150219	ERR1879393	Romania	1994		Public
CNRVC150223	ERR1879432	Lebanon	1993		Public
CNRVC150229	ERR1879437	Tunisia	1981	T1	Public
CNRVC150230	ERR1879438	Italy	1994		Public
CNRVC150234	ERR1879536	Somalia	1985	T4	Public
CNRVC150244	ERR1879541	Italy	1973		Public
CNRVC150251	ERR1879543	Kenya	1998	T6	Public
CNRVC170168	ERR2265674	Yemen	2016	T13	Public
CNRVC170169	ERR2265675	Yemen	2016	T13	Public
CNRVC170170	ERR2265676	Yemen	2016	T13	Public
CNRVC170173	ERR2265677	Yemen	2016	T13	Public
CNRVC170174	ERR2265678	Yemen	2016	T13	Public
CNRVC170175	ERR2269613	Yemen	2016	T13	Public
CNRVC170176	ERR2269614	Yemen	2016	T13	Public
CNRVC170177	ERR2269615	Yemen	2016	T13	Public
CNRVC170178	ERR2269616	Yemen	2017	T13	Public
CNRVC170179	ERR2269617	Yemen	2017	T13	Public
CNRVC170180	ERR2269618	Yemen	2017	T13	Public
CNRVC170181	ERR2269619	Yemen	2017	T13	Public
CNRVC170182	ERR2269620	Yemen	2017	T13	Public
CNRVC170183	ERR2269621	Yemen	2017	T13	Public
CNRVC170184	ERR2269622	Yemen	2017	T13	Public
CNRVC170185	ERR2269640	Yemen	2017	T13	Public
CNRVC170186	ERR2269641	Yemen	2017	T13	Public
CNRVC170187	ERR2269642	Yemen	2017	T13	Public
CNRVC170188	ERR2269643	Yemen	2017	T13	Public
CNRVC170189	ERR2269644	Yemen	2017	T13	Public
CNRVC170190	ERR2269645	Yemen	2017	T13	Public
CNRVC170191	ERR2269646	Yemen	2017	T13	Public
CNRVC170192	ERR2269647	Yemen	2017	T13	Public
CNRVC170193	ERR2269648	Yemen	2017	T13	Public
CNRVC170194	ERR2269649	Yemen	2017	T13	Public
CNRVC170195	ERR2269650	Yemen	2017	T13	Public
CNRVC170196	ERR2269709	Yemen	2017	T13	Public
CNRVC170197	ERR2269710	Yemen	2017	T13	Public
CNRVC170198	ERR2269711	Yemen	2017	T13	Public
CNRVC170199	ERR2269712	Yemen	2017	T13	Public
CNRVC170200	ERR2269713	Yemen	2017	T13	Public
CNRVC170201	ERR2269714	Yemen	2017	T13	Public
CNRVC170202	ERR2269715	Yemen	2017	T13	Public
CNRVC170204	ERR2269717	Yemen	2017	T13	Public
CNRVC170205	ERR2269718	Yemen	2017	T13	Public
CNRVC170206	ERR2269809	Yemen	2017	T13	Public
CNRVC170207	ERR2269810	Yemen	2017	T13	Public
CNRVC170208	ERR2269811	Yemen	2017	T13	Public
CNRVC170240	ERR2269832	Yemen	2017	T13	Public
CNRVC170241	ERR2269833	Yemen	2017	T13	Public
CNRVC170242	ERR2269834	Yemen	2017	T13	Public
CNRVC900108	ERR1879546	Guinea	1990	T7	Public
CNRVC900123	ERR976393	Malawi	1990	T1	Public
CNRVC900125	ERR1879547	Mozambique	1990	T1	Public
CNRVC910040	ERR1879548	Cambodia	1991		Public
CNRVC910164	ERR1879549	Turkey	1991		Public
CNRVC910416	ERR1879550	Kurdistan	1991		Public
CNRVC920027	ERR976522	Angola	1992	T1	Public
CNRVC930029	ERR1879559	Myanmar	1971		Public
CNRVC930030	ERR1879560	Slovakia	1970		Public
CNRVC930033	ERR1879561	Israel	1970		Public
CNRVC930037	ERR976398	Sierra Leone	1970	T1	Public
CNRVC930038	ERR976399	Ethiopia	1970	T3	Public
CNRVC930042	ERR976400	Cameroon	1970	T1	Public
CNRVC930044	ERR1879563	Lebanon	1970		Public
CNRVC930060	ERR1879564	Philippines	1961		Public
CNRVC930067	ERR1879567	Cambodia	1963		Public
CNRVC930076	ERR1879568	Iran	1965		Public
CNRVC930079	ERR1879569	France	1970		Public
CNRVC930166	ERR976406	Algeria	1975	T1	Public
CNRVC930170	ERR976410	Congo	1984	T5	Public
CNRVC930171	ERR976411	Cote d'Ivoire	1984	T1	Public
CNRVC930172	ERR976412	Algeria	1986	T7	Public
CNRVC930174	ERR1879571	Sri Lanka	1981		Public
CNRVC930428	ERR976531	Tanzania	1993	T5	Public
CNRVC940044	ERR1879573	Philippines	1963		Public
CNRVC940103	ERR976537	Guinea	1994	T9	Public
CNRVC940137	ERR976541	Morocco	1994	T7	Public
CNRVC940147	ERR976545	Liberia	1994	T7	Public
CNRVC940149	ERR1879577	Albania	1994		Public
CNRVC940163	ERR998656	Chad	1994	T7	Public
CNRVC940183	ERR1879578	French Guiana	1994	T2	Public
CNRVC940190	ERR998663	Niger	1994	T7	Public
CNRVC950007	ERR998665	Angola	1995	T1	Public
CNRVC950014	ERR1879579	Ecuador	1995	T2	Public
CNRVC950087	ERR976416	Chad	1972	T1	Public
CNRVC950100	ERR1879580	Malaysia	1973		Public
CNRVC950161	ERR1879581	Vietnam	1966		Public
CNRVC950165	ERR1879582	Vietnam	1968		Public
CNRVC950172	ERR1879583	Vietnam	1969		Public
CNRVC950235	ERR976431	Nigeria	1970	T1	Public
CNRVC950250	ERR1879585	Italy	1974		Public
CNRVC950343	ERR976435	Senegal	1972	T1	Public
CNRVC950358	ERR976437	Chad	1974	T1	Public
CNRVC950405	ERR976443	Burkina Faso	1974	T1	Public
CNRVC950468	ERR976447	Morocco	1972	T1	Public
CNRVC950535	ERR976451	Comoros	1975	T1	Public
CNRVC950569	ERR976457	Angola	1970	T1	Public
CNRVC950641	ERR1879587	Myanmar	1972		Public
CNRVC950712	ERR998675	Sierra Leone	1995	T9	Public
CNRVC950792	ERR1879588	Iraq	1995		Public
CNRVC950798	ERR1879593	Iraq	1995		Public
CNRVC960142	ERR1879595	Sudan	1996	T6	Public
CNRVC960218	ERR998698	Congo	1996	T7	Public
CNRVC960243	ERR998702	Chad	1996	T9	Public
CNRVC960246	ERR998703	Cameroon	1996	T9	Public
CNRVC960254	ERR998706	Nigeria	1996	T9	Public
CNRVC960299	ERR998713	Rwanda	1996	T5	Public
CNRVC960579	ERR976460	Benin	1970	T1	Public
CNRVC960627	ERR976465	Ghana	1970	T1	Public
CNRVC960629	ERR976466	Guinea	1970	T1	Public
CNRVC960768	ERR1879601	Iraq	1966		Public
CNRVC960778	ERR1879602	Iraq	1966		Public
CNRVC960800	ERR1879604	Iran	1965		Public
CNRVC960842	ERR1879605	Iran	1965		Public
CNRVC960872	ERR1879607	Iran	1965		Public
CNRVC960891	ERR1879624	Israel	1970		Public
CNRVC960911	ERR1879626	Israel	1970		Public
CNRVC960918	ERR1879627	Jordan	1970		Public
CNRVC960922	ERR1879628	Lebanon	1970		Public
CNRVC960946	ERR976469	Liberia	1970	T1	Public
CNRVC960951	ERR976471	Libya	1970	T1	Public
CNRVC960952	ERR976472	Mali	1970	T1	Public
CNRVC960959	ERR976473	Niger	1970	T1	Public
CNRVC961005	ERR1879630	Pakistan	1964		Public
CNRVC961017	ERR1879631	Slovakia	1970		Public
CNRVC961018	ERR1879632	Slovakia	1970		Public
CNRVC961077	ERR1879633	Thailand	1963		Public
CNRVC961129	ERR1879634	Vietnam	1964		Public
CNRVC970027	ERR998729	Congo	1997	T7	Public
CNRVC970036	ERR998731	Cameroon	1997	T7	Public
CNRVC970056	ERR1879636	Burundi	1997	T5	Public
CNRVC970075	ERR998735	Central African Republic	1997	T7	Public
CNRVC970110	ERR998739	Central African Republic	1997	T9	Public
CNRVC970174	ERR976548	Congo	1997	T5	Public
CNRVC980026	ERR976557	Comoros	1998	T10	Public
CNRVC980030	ERR976559	Congo	1998	T7	Public
CNRVC980044	ERR976482	Djibouti	1985	T4	Public
CNRVC980324	ERR976569	Rwanda	1998	T10	Public
CNRVC980356	ERR976571	Sudan	1998	T10	Public
CNRVC980359	ERR976572	Burkina Faso	1998	T9	Public
CNRVC980418	ERR976580	Sierra Leone	1998	T7	Public
CNRVC990194	ERR1879644	Cambodia	1999		Public
CNRVC990209	ERR1879645	Laos	1999		Public
CNRVC990298	ERR1879648	Afghanistan	1999		Public
CNRVC990299	ERR1879649	Afghanistan	1999		Public
CNRVC990329	ERR1879650	Cameroon	1999	T7	Public
CP1042	SRR227324	Thailand	2010		Public
D118_CDC	ERR576972	China	1961		Public
DMAVC-1	DRR395015	Bangladesh	24.03.22	BD-1.2	Public
DMAVC-10	DRR395005	Bangladesh	28.03.22	BD-1.2	Public
DMAVC-11	DRR394997	Bangladesh	29.03.22	BD-1.2	Public
DMAVC-12	DRR395012	Bangladesh	29.03.22	BD-1.2	Public
DMAVC-13	DRR395009	Bangladesh	29.03.22	BD-1.2	Public
DMAVC-14	DRR394998	Bangladesh	29.03.22	BD-1.2	Public
DMAVC-15	DRR395000	Bangladesh	03.04.22	BD-1.2	Public
DMAVC-16	DRR395004	Bangladesh	03.04.22	BD-1.2	Public
DMAVC-17	DRR395013	Bangladesh	05.04.22	BD-1.2	Public
DMAVC-2	DRR395007	Bangladesh	24.03.22	BD-1.2	Public
DMAVC-20	DRR394996	Bangladesh	15.11.21	BD-1.2	Public
DMAVC-3	DRR395001	Bangladesh	24.03.22	BD-1.2	Public
DMAVC-4	DRR394994	Bangladesh	27.03.22	BD-1.2	Public
DMAVC-5	DRR395006	Bangladesh	27.03.22	BD-1.2	Public
DMAVC-6	DRR395002	Bangladesh	27.03.22	BD-1.2	Public
DMAVC-7	DRR395010	Bangladesh	28.03.22	BD-1.2	Public
DMAVC-8	DRR395008	Bangladesh	28.03.22	BD-1.2	Public
DMAVC-9	DRR395014	Bangladesh	28.03.22	BD-1.2	Public
Dr1	ERR3039950	Tanzania	2017-09		Public
Dr2	ERR3039951	Tanzania	2017-09		Public
EDC-702	SAMN13704153	Bangladesh	2015		Public
EDC-705	SAMN13704154	Bangladesh	2015		Public
EDC-706	SAMN13704155	Bangladesh	2015		Public
EDC-721	SAMN13704157	Bangladesh	2015		Public
EDC-727	SAMN13704158	Bangladesh	2015		Public
EDC-728	SAMN13704159	Bangladesh	2015		Public
EDC-753	SAMN13964162	Bangladesh	2016		Public
EDC-754	SAMN13704160	Bangladesh	2016		Public
EDC-755	SAMN13704161	Bangladesh	2016		Public
F11D4	ERR051755	Pakistan	2010		Public
F12D1	ERR051756	Pakistan	2010		Public
F135	ERR1879651	Cameroon	1993	T1	Public
F1393	ERR1879652	Djibouti	1993	T6	Public
F14KPD3	ERR051758	Pakistan	2010		Public
F15KTH7	ERR051759	Pakistan	2010		Public
F1DN4	ERR051745	Pakistan	2010		Public
F2D59	ERR051746	Pakistan	2010		Public
F3835	ERR1879655	Tanzania	1997	T5	Public
F4D48	ERR051748	Pakistan	2010		Public
F5097	ERR1880761	Malawi	1997	T5	Public
F5149	ERR1880763	Mozambique	1997	T8	Public
F5197	ERR1880764	Zambia	1998	T5	Public
F5D38	ERR051749	Pakistan	2010		Public
F7D30	ERR051751	Pakistan	2010		Public
F8D25	ERR051752	Pakistan	2010		Public
Fish1	ERR3039943	Tanzania	2017		Public
Fish2	ERR3039944	Tanzania	2017		Public
Fish3	ERR3039945	Tanzania	2017		Public
Fish4	ERR3039946	Tanzania	2017		Public
Gaz2	ERR042729	Palestine	1994		Public
Gaz21	ERR042738	Palestine	1994		Public
GD196110_CDC	ERR576971	China	1961		Public
GP106	ERR018194	Germany	1975	L2	Public
GP140	ERR018193	Malaysia	1978	L2	Public
GP143	ERR018192	Bahrain	1978	L2	Public
GP145	ERR018191	India	1979	L2	Public
GP152	ERR018188	India	1979	L2	Public
GP160	ERR025379	India	1980	L2	Public
GP60	ERR018186	India	1973	L2	Public
H_3687	ERR466829	Mexico	2013	LAT-3	Public
H_3848	ERR466830	Mexico	2013	LAT-3	Public
H_4073	ERR466831	Mexico	2013	LAT-3	Public
HC_06A1	SRR190870	Haiti	2010	LAT-3	Public
HC_22A1	SRR191381	Haiti	2010	LAT-3	Public
HC_28A1	SRR191380	Haiti	2010	LAT-3	Public
HC_40A1	SRR135545	Haiti	2010	LAT-3	Public
HC_43A1	SRR135603	Haiti	2010	LAT-3	Public
HC_80A1	SRR191350	Haiti	2010	LAT-3	Public
HC_81A1	SRR191343	Haiti	2010	LAT-3	Public
IDH-00005	DRR069011	India	2007	IND-2	Public
IDH-00019	DRR069012	India	2007	IND-2	Public
IDH-00030	DRR069013	India	2007	IND-1	Public
IDH-00052	DRR069014	India	2007	IND-1	Public
IDH-00057	DRR069015	India	2007	IND-1	Public
IDH-00081	DRR069016	India	2007	IND-1	Public
IDH-00113	DRR069017	India	2007	IND-1	Public
IDH-00115	DRR069018	India	2007	IND-2	Public
IDH-00141	DRR069019	India	2007	IND-1	Public
IDH-00150	DRR069020	India	2007	IND-1	Public
IDH-00373	DRR069021	India	2008	IND-1	Public
IDH-00449	DRR069022	India	2008	IND-1	Public
IDH-00527	DRR069023	India	2008	IND-1	Public
IDH-00544	DRR069024	India	2008	IND-1	Public
IDH-00574	DRR069025	India	2008	IND-1	Public
IDH-00745	DRR069026	India	2008	IND-2	Public
IDH-00845	DRR069027	India	2008	IND-1	Public
IDH-00982	DRR069028	India	2008	IND-1	Public
IDH-01241	DRR069029	India	2008	IND-2	Public
IDH-01439	DRR069030	India	2009	IND-2	Public
IDH-01568	DRR069031	India	2009	IND-2	Public
IDH-01728	DRR069032	India	2009	IND-2	Public
IDH-01850	DRR069033	India	2009	IND-2	Public
IDH-01986	DRR069034	India	2009	IND-1	Public
IDH-02185	DRR069035	India	2009	IND-1	Public
IDH-02222	DRR069036	India	2009	IND-1	Public
IDH-02384	DRR069037	India	2009	IND-1	Public
IDH-02387	DRR069038	India	2009	IND-1	Public
IDH-02501	DRR069039	India	2009	IND-1	Public
IDH-02777	DRR069040	India	2010	IND-2	Public
IDH-02843	DRR069041	India	2010	IND-2	Public
IDH-02922	DRR069043	India	2010	IND-2	Public
IDH-02991	DRR069044	India	2010	IND-2	Public
IDH-03107	DRR069045	India	2010	IND-2	Public
IDH-03159	DRR069046	India	2010	IND-2	Public
IDH-03291	DRR069047	India	2010	IND-2	Public
IDH-03329	DRR069048	India	2010	IND-2	Public
IDH-03506	DRR069050	India	2011	IND-2	Public
IDH-03584	DRR069051	India	2011	IND-2	Public
IDH-03633	DRR069053	India	2011	IND-2	Public
IDH-03766	DRR069056	India	2011	IND-2	Public
IDH-03892	DRR069057	India	2011	IND-2	Public
IDH-03997	DRR069059	India	2011	IND-2	Public
IDH-04018	DRR069060	India	2012	IND-2	Public
IDH-04127	DRR069061	India	2012	IND-2	Public
IDH-04268	DRR069062	India	2012	IND-2	Public
IDH-04415	DRR069064	India	2012	IND-2	Public
IDH-04493	DRR069065	India	2012	IND-2	Public
IDH-04625	DRR069066	India	2012	IND-2	Public
IDH-04677	DRR069067	India	2012	IND-2	Public
IDH-04808	DRR069068	India	2012	IND-2	Public
IDH-04858	DRR069069	India	2012	IND-2	Public
IDH-04986	DRR069070	India	2013	IND-2	Public
IDH-05135	DRR069071	India	2013	IND-2	Public
IDH-05241	DRR069072	India	2013	IND-2	Public
IDH-05298	DRR069073	India	2013	IND-2	Public
IDH-05385	DRR069075	India	2013	IND-2	Public
IDH-05467	DRR069076	India	2013	IND-2	Public
IDH-05640	DRR069078	India	2013	IND-2	Public
IDH-06175	DRR069080	India	2014	IND-2	Public
IDH-06592	DRR069082	India	2014	IND-2	Public
IDH-06636	DRR069083	India	2014	IND-2	Public
IDH-06845	DRR069085	India	2014	IND-2	Public
IDH-07034	DRR069087	India	2014	IND-2	Public
IDH-07176	DRR069088	India	2014	IND-2	Public
IDH-07230	DRR069089	India	2014	IND-2	Public
IDHO1726	ERR018187	India	2009	L2	Public
IND201	DRR189331	India	2015-5	AS-2	Public
IND203	DRR189332	India	2015-7	AS-2	Public
IND204	DRR189333	India	2015-8	AS-1	Public
IND208	DRR189334	India	2015-9	AS-2	Public
IND211	DRR189335	India	2015-10	AS-2	Public
IND215	DRR189336	India	2015-11	AS-2	Public
IND219	DRR189337	India	2016-2	AS-2	Public
IND220	DRR189338	India	2016-3	AS-2	Public
IND222	DRR189339	India	2016-4	AS-2	Public
IND225	DRR189340	India	2016-5	AS-2	Public
IND227	DRR189341	India	2016-6	AS-2	Public
IND230	DRR189342	India	2016-7	AS-2	Public
IND231	DRR189343	India	2016-8	AS-2	Public
IND233	DRR189344	India	2016-10	AS-2	Public
IND234	DRR189345	India	2016-11	AS-2	Public
KDCP103	SRR14297669	Bangladesh	2018		Public
KDCP136	SRR14297670	Bangladesh	2018		Public
KDCP137	SRR14297671	Bangladesh	2018		Public
KDCP137	SRR14297672	Bangladesh	2018		Public
KDCP140	SRR14297673	Bangladesh	2018		Public
KDCP144	SRR14297674	Bangladesh	2018		Public
KDCP147	SRR14297676	Bangladesh	2018		Public
KDCP148	SRR14297677	Bangladesh	2018		Public
KDCP152	SRR14297678	Bangladesh	2018		Public
KDCP154	SRR14297679	Bangladesh	2018		Public
KDCP168	SRR14297545	Bangladesh	2018		Public
KDCP183	SRR14297546	Bangladesh	2019		Public
KDCP187	SRR14297547	Bangladesh	2019		Public
KDCP195	SRR14297680	Bangladesh	2019		Public
KDCP202	SRR14297681	Bangladesh	2019		Public
KDCP208	SRR14297682	Bangladesh	2019		Public
KDCP215	SRR14297548	Bangladesh	2019		Public
KDCP220	SRR14297549	Bangladesh	2019		Public
KDCP226	SRR14297550	Bangladesh	2019		Public
KDCP228	SRR14297684	Bangladesh	2019		Public
KDCP231	SRR14297551	Bangladesh	2019		Public
KDCP241	SRR14297552	Bangladesh	2019		Public
KDCP245	SRR14297553	Bangladesh	2019		Public
KDCP250	SRR14297685	Bangladesh	2019		Public
KDCP254	SRR14297686	Bangladesh	2019		Public
KDCP260	SRR14297687	Bangladesh	2019		Public
KDCP262	SRR14297554	Bangladesh	2019		Public
KDCP262	SRR14297555	Bangladesh	2019		Public
KDCP264	SRR14297556	Bangladesh	2019		Public
KDCP270	SRR14297689	Bangladesh	2019		Public
KDCP278	SRR14297557	Bangladesh	2019		Public
KDCP281	SRR14297558	Bangladesh	2019		Public
KDCP68	SRR14297659	Bangladesh	2018		Public
KDCP68	SRR14297660	Bangladesh	2018		Public
KDCP68	SRR14297661	Bangladesh	2018		Public
KDCP69	SRR14297662	Bangladesh	2018		Public
KDCP73	SRR14297636	Bangladesh	2018		Public
KDCP73	SRR14297650	Bangladesh	2018		Public
KDCP74	SRR14297542	Bangladesh	2018		Public
KDCP79	SRR14297543	Bangladesh	2018		Public
KDCP81	SRR14297544	Bangladesh	2018		Public
KDCP82	SRR14297663	Bangladesh	2018		Public
KDCP83	SRR14297665	Bangladesh	2018		Public
KDCP87	SRR14297666	Bangladesh	2018		Public
KDCP90	SRR14297667	Bangladesh	2018		Public
KDCP98	SRR14297668	Bangladesh	2018		Public
Kg1	ERR3039952	Tanzania	2015-10		Public
Kg2	ERR3039953	Tanzania	2015-10		Public
KMCP107	SRR14297699	Bangladesh	2019		Public
KMCP119	SRR14297569	Bangladesh	2019		Public
KMCP134	SRR14297570	Bangladesh	2019		Public
KMCP137	SRR14297571	Bangladesh	2019		Public
KMCP138	SRR14297700	Bangladesh	2019		Public
KMCP145	SRR14297701	Bangladesh	2019		Public
KMCP146	SRR14297458	Bangladesh	2019		Public
KMCP160	SRR14297648	Bangladesh	2019		Public
KMCP160	SRR14297481	Bangladesh	2019		Public
KMCP49	SRR14297559	Bangladesh	2018		Public
KMCP52	SRR14297690	Bangladesh	2018		Public
KMCP55	SRR14297691	Bangladesh	2018		Public
KMCP56	SRR14297692	Bangladesh	2018		Public
KMCP57	SRR14297560	Bangladesh	2018		Public
KMCP61	SRR14297561	Bangladesh	2018		Public
KMCP65	SRR14297562	Bangladesh	2018		Public
KMCP67	SRR14297694	Bangladesh	2018		Public
KMCP68	SRR14297563	Bangladesh	2018		Public
KMCP69	SRR14297564	Bangladesh	2018		Public
KMCP70	SRR14297565	Bangladesh	2018		Public
KMCP72	SRR14297695	Bangladesh	2018		Public
KMCP80	SRR14297696	Bangladesh	2018		Public
KMCP85	SRR14297697	Bangladesh	2018		Public
KMCP88	SRR14297566	Bangladesh	2018		Public
KMCP90	SRR14297657	Bangladesh	2018		Public
KMCP90	SRR14297658	Bangladesh	2018		Public
KMCP90	SRR14297567	Bangladesh	2018		Public
KMCP93	SRR14297568	Bangladesh	2018		Public
KNC124	ERR117596	Kenya	2009	T10	Public
KNC133	ERR117579	Kenya	2007	T10	Public
KNC135	ERR117572	Kenya	2009	T10	Public
KNC143	ERR117598	Kenya	2010	T10	Public
KNC146	ERR117591	Kenya	2010	T10	Public
KNC149	ERR117582	Kenya	2009	T10	Public
KNC155	ERR117597	Kenya	2010	T10	Public
KNC156	ERR117594	Kenya	2009	T10	Public
KNC157	ERR117592	Kenya	2009	T10	Public
KNC1583	ERR117602	Kenya	2009	T10	Public
KNC161	ERR117590	Kenya	2009	T10	Public
KNC1709	ERR114417	Kenya	2009		Public
KNC1888	ERR117593	Kenya	2010	T10	Public
KNC205	ERR117601	Kenya	2009	T10	Public
KNC231	ERR117600	Kenya	2009		Public
KNC241	ERR117603	Kenya	2009	T10	Public
KNC8669	ERR117599	Kenya	2010	T10	Public
KNC8673	ERR114415	Kenya	2009	T10	Public
KNC8678	ERR114416	Kenya	2009	T10	Public
KNC8679	ERR117606	Kenya	2008	T10	Public
KNC8885	ERR117595	Kenya	2010	T10	Public
KNE11B	ERR117484	Kenya	2010	T10	Public
KNE134	ERR117480	Kenya	2009	T10	Public
KNE134B	ERR117482	Kenya	2009	T10	Public
KNE170	ERR117485	Kenya	2009	T10	Public
KNE3C	ERR117473	Kenya	2010	T10	Public
KNEXC	ERR117555	Kenya	2009	T10	Public
KNEXX	ERR117544	Kenya	2009	T10	Public
KNEXXH	ERR117556	Kenya	2009	T10	Public
L198	ERR386695	Congo	2012	T10	Public
L211	ERR386666	Guinea	2012	T9	Public
L273	ERR386656	Zambia	2012	T10	Public
L354	ERR572821	Congo	2011	T10	Public
L363	ERR572559	Congo	2013	T10	Public
L399	ERR572582	Togo	2011	T9	Public
L409	ERR572842	Togo	2012	T12	Public
MAB001	DRR335691	Bangladesh	2004	BD-1	Public
MAB002	DRR335692	Bangladesh	2004	BD-1.1	Public
MAB003	DRR335693	Bangladesh	2004	BD-2	Public
MAB004	DRR335694	Bangladesh	2005	BD-2	Public
MAB005	DRR335695	Bangladesh	2005	BD-1	Public
MAB006	DRR335696	Bangladesh	2005	BD-2	Public
MAB007	DRR335697	Bangladesh	2005	BD-1	Public
MAB008	DRR335698	Bangladesh	2006	BD-2	Public
MAB011	DRR335700	Bangladesh	2007	BD-1	Public
MAB012	DRR335701	Bangladesh	2007	BD-1	Public
MAB013	DRR335702	Bangladesh	2007	BD-1	Public
MAB014	DRR335703	Bangladesh	2008	BD-2	Public
MAB015	DRR335704	Bangladesh	2008	BD-2	Public
MAB017	DRR335705	Bangladesh	2009	BD-2	Public
MAB018	DRR335706	Bangladesh	2010	BD-1.1	Public
MAB019	DRR335707	Bangladesh	2010	BD-1.1	Public
MAB021	DRR335708	Bangladesh	2010	BD-1.1	Public
MAB022	DRR335709	Bangladesh	2010	BD-2	Public
MAB023	DRR335710	Bangladesh	2011	BD-2	Public
MAB025	DRR335711	Bangladesh	2011	BD-2	Public
MAB026	DRR335712	Bangladesh	2011	BD-2	Public
MAB027	DRR335713	Bangladesh	2011	BD-2	Public
MAB028	DRR335714	Bangladesh	2011	BD-2	Public
MAB029	DRR335715	Bangladesh	2011	BD-2	Public
MAB030	DRR335716	Bangladesh	2011	BD-2	Public
MAB032	DRR335717	Bangladesh	2012	BD-2	Public
MAB033	DRR335718	Bangladesh	2012	BD-2	Public
MAB034	DRR335719	Bangladesh	2012	BD-2	Public
MAB035	DRR335720	Bangladesh	2012	BD-0	Public
MAB037	DRR335721	Bangladesh	2012	BD-0	Public
MAB038	DRR335722	Bangladesh	2012	BD-2	Public
MAB039	DRR335723	Bangladesh	2012	BD-0	Public
MAB040	DRR335724	Bangladesh	2013	BD-2	Public
MAB041	DRR335725	Bangladesh	2014	BD-2	Public
MAM062	DRR391447	Mexico	1991	LAT-2	Public
MAM063	DRR391449	Mexico	1992	LAT-2	Public
MAM064	DRR391450	Mexico	1993	LAT-2	Public
MAM065	DRR391456	Mexico	1994	LAT-2	Public
MAM067	DRR391454	Mexico	1995	LAT-2	Public
MAM068	DRR391455	Mexico	1998	LAT-2	Public
MAM069	DRR391451	Mexico	1999	LAT-2	Public
MAM070	DRR391452	Mexico	1999	LAT-2	Public
MAM072	DRR391457	Mexico	2000	LAT-2	Public
MAM073	DRR391453	Mexico	2000	LAT-2	Public
MAM088	DRR391448	Mexico	2006	LAT-1	Public
Mb1	ERR3039954	Tanzania	2017-09		Public
Mb2	ERR3039955	Tanzania	2017-09		Public
MBN17	ERR018123	India	2004	L2	Public
MBRN14	ERR018130	India	2004	L2	Public
Mex6	ERR042754	Mexico	1992	LAT-2	Public
MG116025	ERR018122	Bangladesh	1991	L2	Public
MG116025	ERR018122	Bangladesh	1991	BD-0	Public
MG116226	ERR025396	Bangladesh	1991	BD-0	Public
MJ1485	ERR018120	Bangladesh	1994	L2	Public
MJ1485	ERR018120	Bangladesh	1994	BD-0	Public
Mo1	ERR3039956	Tanzania	2016-08		Public
Mo2	ERR3039957	Tanzania	2016-08		Public
Mz1	ERR3039958	Tanzania	2016-03		Public
Mz2	ERR3039959	Tanzania	2016-03		Public
NICD_273	ERR1880789	South Africa	1998	T8	Public
P1	ERR1485245	Thailand	2010		Public
P17	ERR1485249	Thailand	2010		Public
P25	ERR1485251	Thailand	2010		Public
P30	ERR1485225	Thailand	2010		Public
P33	ERR1485253	Thailand	2010		Public
P34	ERR1485227	Thailand	2010		Public
P35	ERR1485229	Thailand	2010		Public
P36	ERR1485255	Thailand	2010		Public
P37	ERR1485231	Thailand	2010		Public
P38	ERR1485233	Thailand	2010		Public
P39	ERR1485235	Thailand	2010		Public
P42	ERR1485237	Thailand	2010		Public
P43	ERR1485239	Thailand	2010		Public
P44	ERR1485241	Thailand	2010		Public
P45	ERR1485257	Thailand	2010		Public
P46	ERR1485243	Thailand	2010		Public
P48	ERR1485261	Thailand	2010		Public
P8	ERR1485247	Thailand	2010		Public
Plankton2	ERR3039948	Tanzania	2017		Public
Plankton3	ERR3039949	Tanzania	2017		Public
PRL18	ERR018185	India	1984	L2	Public
PRL5	ERR018189	India	1980	L2	Public
PRL64	ERR018195	India	1992	L2	Public
RKI-ZBS2-CH218	ERR1880794	Turkey	1994		Public
RKI-ZBS2-CH234	ERR1880795	Turkey	1994		Public
RKI-ZBS2-CH8	ERR1880796	Spain	1971		Public
RKI-ZBS2-CH99	ERR1880797	Turkey	1980		Public
Rv1	ERR3039960	Tanzania	2017-11		Public
Rv2	ERR3039961	Tanzania	2017-11		Public
S0014	ERR2144781	Mozambique	2002	T11	Public
S0034	ERR2144756	Mozambique	2002	T11	Public
S0035	ERR2144792	Mozambique	2002	T11	Public
S1019828_5	ERR2144735	Mozambique	2010	T11	Public
Sg1	ERR3039962	Tanzania	2017-10		Public
Sg2	ERR3039963	Tanzania	2017-10		Public
T21_CDC	ERR576970	Thailand	1990		Public
Tg1	ERR3039964	Tanzania	2015-12		Public
Tg2	ERR3039965	Tanzania	2015-12		Public
THSTI_GP106bis	ERR1880815	Germany	1975		Public
UG010	SRR6871249	Uganda	2016-01	T13	Public
UG020	SRR6871250	Uganda	2016-01	T13	Public
UG026	SRR6871247	Uganda	2015-04	T13	Public
UG040	SRR6871253	Uganda	2015-07	T13	Public
UG042	SRR6871248	Uganda	2015-05	T13	Public
UG046	SRR6871245	Uganda	2015-04	T13	Public
UG054	SRR6871246	Uganda	2015	T13	Public
UG060	SRR6871254	Uganda	2014-05	T13	Public
UG071	SRR6871251	Uganda	2014-04	T13	Public
UG086	SRR6871252	Uganda	2015	T13	Public
V01_CDC	ERR576950	Chile	1991	LAT-1	Public
V109	ERR018126	India	1990	L2	Public
V212-1	ERR018125	India	1991	L2	Public
V5	ERR018127	India	1989	L2	Public
VC O1_10	ERR1485267	Thailand	2000		Public
VC O1_8	ERR1485269	Thailand	2000		Public
VC O1_9	ERR1485271	Thailand	2000		Public
VC-1	SRR308665	Nepal	2010		Public
VC-10	SRR308707	Nepal	2010		Public
VC-12	SRR308709	Nepal	2010		Public
VC-13	SRR308713	Nepal	2010		Public
VC-14	SRR308715	Nepal	2010		Public
VC-15	SRR308716	Nepal	2010		Public
VC-16	SRR308717	Nepal	2010		Public
VC-19	SRR308722	Nepal	2010		Public
VC-2	SRR308690	Nepal	2010		Public
VC-21	SRR308724	Nepal	2010		Public
VC-22	SRR308725	Nepal	2010		Public
VC-3	SRR308691	Nepal	2010		Public
VC-4	SRR308692	Nepal	2010		Public
VC-5	SRR308693	Nepal	2010		Public
VC-6	SRR308703	Nepal	2010		Public
VC-7	SRR308704	Nepal	2010		Public
VC-8	SRR308705	Nepal	2010		Public
VC2248_1_CDC	ERR579090	China	2008		Public
VC2454_CDC	ERR579089	China	2005		Public
VC51	ERR018124	India	1992	L2	Public
VE1	ERR037738	Kenya	2009	T10	Public
VE2	ERR037739	Kenya	2009	T10	Public
VE3	ERR037741	Kenya	2009	T10	Public
Water1	ERR3077564	Tanzania	2017		Public
Water2	ERR3077565	Tanzania	2017		Public
X190_CDC	ERR580006	Peru	1991	LAT-1	Public
Zb1	ERR3039966	Tanzania	2016-03		Public
Zb2	ERR3039967	Tanzania	2016-04		Public
Zb3	ERR3039968	Tanzania	2016-05		Public
Zb4	ERR3039969	Tanzania	2017-05		Public
Zb5	ERR3039970	Tanzania	2017-05		Public
Zb6	ERR3039971	Tanzania	2017-05		Public
Zim_12	ERR044798	Zimbabwe	2009	T11	Public
Zim_27	ERR044800	Zimbabwe	2009	T8	Public
863-CDC	ERR576978	Mauritania	1986	T1	Public
116072	ERR044779	Mexico	1991	LAT-2	Public
87258	ERR044780	Mexico	1991	LAT-2	Public
116073	ERR044781	Mexico	1991	LAT-2	Public
7929	ERR163233	Mexico	1991	LAT-2	Public
8012	ERR163234	Mexico	1991	LAT-2	Public
8204	ERR163236	Mexico	1991	LAT-2	Public
8338	ERR163237	Mexico	1991	LAT-2	Public
87151	ERR044782	Mexico	1992	LAT-2	Public
116075	ERR044783	Mexico	1992	LAT-2	Public
16974	ERR163238	Mexico	1992	LAT-2	Public
19294	ERR163239	Mexico	1992	LAT-2	Public
87397	ERR044784	Mexico	1993	LAT-2	Public
87667	ERR044785	Mexico	1993	LAT-2	Public
87662	ERR044786	Mexico	1993	LAT-2	Public
33297	ERR163240	Mexico	1993	LAT-2	Public
87406	ERR044787	Mexico	1994	LAT-2	Public
54267	ERR163241	Mexico	1994	LAT-2	Public
87409	ERR044788	Mexico	1995	LAT-2	Public
60452	ERR163243	Mexico	1995	LAT-2	Public
95430	ERR044791	Mexico	1997	LAT-2	Public
82	ERR108516	Mexico	1998	LAT-2	Public
838	ERR108517	Mexico	1999	LAT-2	Public
54	ERR108518	Mexico	1999	LAT-2	Public
85	ERR108522	Mexico	2000	LAT-2	Public
2006	ERR108535	Mexico	2004	LAT-1	Public
1401	ERR163245	Mexico	2004	LAT-1	Public
1992	ERR163246	Mexico	2004	LAT-1	Public
2007	ERR163248	Mexico	2004	LAT-1	Public
5032	ERR108536	Mexico	2005	LAT-1	Public
688	ERR108537	Mexico	2006	LAT-1	Public
985	ERR163249	Mexico	2007	LAT-1	Public
2533	ERR163250	Mexico	2007	LAT-1	Public
354	ERR163253	Mexico	2008	LAT-1	Public
372	ERR163254	Mexico	2008	LAT-1	Public
504	ERR163255	Mexico	2008	LAT-1	Public
971	ERR163256	Mexico	2008	LAT-1	Public
210	ERR163259	Mexico	2010	LAT-3	Public
211	ERR163260	Mexico	2010	LAT-3	Public
2496	ERR163268	Mexico	2010	LAT-3	Public
204	ERR163271	Mexico	2010	LAT-3	Public
4339	ERR025361	India	2004	L2	Public
4646	ERR025372	India	2007	L2	Public
7682	ERR028066	Kenya	2009	L2	Public
7684	ERR028068	Kenya	2009	L2	Public
7687	ERR028074	Kenya	2009	L2	Public
7686	ERR028075	Kenya	2009	L2	Public
7685	ERR028076	Kenya	2009	L2	Public
MAB010	DRR335613	Bangladesh	2007	BD-2	Public
4670	ERR019883	Bangladesh	1991	L2	Public
4679	ERR018114	Bangladesh	1999	L2	Public
4672	ERR019884	Bangladesh	2000	L2	Public
4675	ERR018113	Bangladesh	2001	L2	Public
4663	ERR018115	Bangladesh	2001	L2	Public
4661	ERR018116	Bangladesh	2001	L2	Public
4662	ERR025373	Bangladesh	2001	L2	Public
4322	ERR019881	India	2004	L2	Public
4519	ERR025374	India	2005	L2	Public
4656	ERR018112	India	2006	L2	Public
4642	ERR019882	India	2006	L2	Public
4488	ERR025369	India	2006	L2	Public
4605	ERR018111	India	2007	L2	Public
4551	ERR025357	India	2007	L2	Public
4623	ERR025358	India	2007	L2	Public
4593	ERR025359	India	2007	L2	Public
4538	ERR025360	India	2007	L2	Public
4585	ERR025366	India	2007	L2	Public
4552	ERR025368	India	2007	L2	Public
4600	ERR025371	India	2007	L2	Public
4536	ERR025375	India	2007	L2	Public
1362	ERR025367	Mozambique	2005	L2	Public
4784	ERR025370	Tanzania	2009	L2	Public
4111	ERR019880	Vietnam	2002	L2	Public
4113	ERR025364	Vietnam	2003	L2	Public
4121	ERR025362	Vietnam	2004	L2	Public
4122	ERR019885	Vietnam	2007	L2	Public
4110	ERR019879	Vietnam	1995	L2	Public
4053024306	ERR1485312	Thailand	2010		Public
DMAVC-18	DRR395015	Bangladesh	05.04.22	BD-1.2	Public
DMAVC-19	DRR395006	Bangladesh	6.02.22	BD-1.2	Public
DMAVC-21	DRR395002	Bangladesh	6.02.22	BD-1.2	Public
DMAVC-22	DRR395014	Bangladesh	04.04.22	BD-1.2	Public
217	ERR386672	Congo	2009	T10	Public
NGICDV-001	SRR26202727	Bangladesh	2015	BD-2	This Study
NGICDV-002	SRR26202726	Bangladesh	2015	BD-2	This Study
NGICDV-003	SRR26202686	Bangladesh	2015	BD-2	This Study
NGICDV-005	SRR26202675	Bangladesh	2015	BD-2	This Study
NGICDV-011	SRR26202664	Bangladesh	2015	BD-2	This Study
NGICDV-012	SRR26202653	Bangladesh	2015	BD-2	This Study
NGICDV-013	SRR26202642	Bangladesh	2015	BD-2	This Study
NGICDV-014	SRR26202631	Bangladesh	2015	BD-2	This Study
NGICDV-015	SRR26202620	Bangladesh	2015	BD-2	This Study
NGICDV-017	SRR26202609	Bangladesh	2015	BD-2	This Study
NGICDV-018	SRR26202725	Bangladesh	2015	BD-2	This Study
NGICDV-019	SRR26202714	Bangladesh	2015	BD-2	This Study
NGICDV-020	SRR26202703	Bangladesh	2015	BD-2	This Study
NGICDV-025	SRR26202693	Bangladesh	2016	BD-2	This Study
NGICDV-026	SRR26202692	Bangladesh	2016	BD-2	This Study
NGICDV-027	SRR26202691	Bangladesh	2016	BD-2	This Study
NGICDV-029	SRR26202690	Bangladesh	2016	BD-2	This Study
NGICDV-030	SRR26202689	Bangladesh	2016	BD-2	This Study
NGICDV-031	SRR26202688	Bangladesh	2016	BD-2	This Study
NGICDV-032	SRR26202687	Bangladesh	2016	BD-2	This Study
NGICDV-033	SRR26202685	Bangladesh	2016	BD-1.2	This Study
NGICDV-034	SRR26202684	Bangladesh	2016	BD-2	This Study
NGICDV-035	SRR26202683	Bangladesh	2016	BD-2	This Study
NGICDV-036	SRR26202682	Bangladesh	2016	BD-2	This Study
NGICDV-037	SRR26202681	Bangladesh	2016	BD-2	This Study
NGICDV-038	SRR26202680	Bangladesh	2016	BD-2	This Study
NGICDV-039	SRR26202679	Bangladesh	2016	BD-2	This Study
NGICDV-040	SRR26202678	Bangladesh	2016	BD-2	This Study
NGICDV-041	SRR26202677	Bangladesh	2017	BD-2	This Study
NGICDV-042	SRR26202676	Bangladesh	2017	BD-2	This Study
NGICDV-043	SRR26202674	Bangladesh	2017	BD-2	This Study
NGICDV-044	SRR26202673	Bangladesh	2017	BD-2	This Study
NGICDV-047	SRR26202672	Bangladesh	2017	BD-2	This Study
NGICDV-048	SRR26202671	Bangladesh	2017	BD-2	This Study
NGICDV-049	SRR26202670	Bangladesh	2017	BD-2	This Study
NGICDV-050	SRR26202669	Bangladesh	2017	BD-1.2	This Study
NGICDV-051	SRR26202668	Bangladesh	2017	BD-2	This Study
NGICDV-052	SRR26202667	Bangladesh	2017	BD-2	This Study
NGICDV-053	SRR26202666	Bangladesh	2017	BD-2	This Study
NGICDV-054	SRR26202665	Bangladesh	2017	BD-2	This Study
NGICDV-055	SRR26202663	Bangladesh	2017	BD-2	This Study
NGICDV-056	SRR26202662	Bangladesh	2017	BD-2	This Study
NGICDV-058	SRR26202661	Bangladesh	2017	BD-2	This Study
NGICDV-061	SRR26202660	Bangladesh	2018	BD-1.2	This Study
NGICDV-062	SRR26202659	Bangladesh	2018	BD-1.2	This Study
NGICDV-063	SRR26202658	Bangladesh	2018	BD-1.2	This Study
NGICDV-065	SRR26202657	Bangladesh	2018	BD-1.2	This Study
NGICDV-066	SRR26202656	Bangladesh	2018	BD-2	This Study
NGICDV-067	SRR26202655	Bangladesh	2018	BD-2	This Study
NGICDV-071	SRR26202654	Bangladesh	2018	BD-1.2	This Study
NGICDV-072	SRR26202652	Bangladesh	2018	BD-1.2	This Study
NGICDV-073	SRR26202651	Bangladesh	2018	BD-1.2	This Study
NGICDV-074	SRR26202650	Bangladesh	2018	BD-1.2	This Study
NGICDV-075	SRR26202649	Bangladesh	2018	BD-1.2	This Study
NGICDV-076	SRR26202648	Bangladesh	2018	BD-1.2	This Study
NGICDV-077	SRR26202647	Bangladesh	2018	BD-1.2	This Study
NGICDV-078	SRR26202646	Bangladesh	2018	BD-1.2	This Study
NGICDV-079	SRR26202645	Bangladesh	2018	BD-1.2	This Study
NGICDV-080	SRR26202644	Bangladesh	2018	BD-1.2	This Study
NGICDV-081	SRR26202643	Bangladesh	2019	BD-2	This Study
NGICDV-082	SRR26202641	Bangladesh	2019	BD-1.2	This Study
NGICDV-084	SRR26202640	Bangladesh	2019	BD-2	This Study
NGICDV-085	SRR26202639	Bangladesh	2019	BD-1.2	This Study
NGICDV-086	SRR26202638	Bangladesh	2019	BD-1.2	This Study
NGICDV-087	SRR26202637	Bangladesh	2019	BD-1.2	This Study
NGICDV-088	SRR26202636	Bangladesh	2019	BD-1.2	This Study
NGICDV-090	SRR26202635	Bangladesh	2019	BD-1.2	This Study
NGICDV-091	SRR26202634	Bangladesh	2019	BD-1.2	This Study
NGICDV-092	SRR26202633	Bangladesh	2019	BD-1.2	This Study
NGICDV-095	SRR26202632	Bangladesh	2019	BD-1.2	This Study
NGICDV-096	SRR26202630	Bangladesh	2019	BD-1.2	This Study
NGICDV-097	SRR26202629	Bangladesh	2019	BD-1.2	This Study
NGICDV-098	SRR26202628	Bangladesh	2019	BD-1.2	This Study
NGIEDV-007	SRR26202627	Bangladesh	2020	BD-1.2	This Study
NGIEDV-017	SRR26202626	Bangladesh	2020	BD-1.2	This Study
NGIEDV-025	SRR26202625	Bangladesh	2020	BD-1.2	This Study
NGIEDV-027	SRR26202624	Bangladesh	2020	BD-1.2	This Study
NGIEDV-028	SRR26202623	Bangladesh	2020	BD-1.2	This Study
NGIEDV-029	SRR26202622	Bangladesh	2020	BD-1.2	This Study
NGIEDV-039	SRR26202621	Bangladesh	2020	BD-1.2	This Study
NGIEDV-044	SRR26202619	Bangladesh	2020	BD-1.2	This Study
NGIEDV-046	SRR26202618	Bangladesh	2020	BD-1.2	This Study
NGIEDV-047	SRR26202617	Bangladesh	2020	BD-1.2	This Study
NGIEDV-048	SRR26202616	Bangladesh	2020	BD-1.2	This Study
NGIEDV-049	SRR26202615	Bangladesh	2020	BD-1.2	This Study
NGIEDV-057	SRR26202614	Bangladesh	2020	BD-1.2	This Study
NGIEDV-058	SRR26202613	Bangladesh	2020	BD-1.2	This Study
NGIEDV-059	SRR26202612	Bangladesh	2020	BD-1.2	This Study
NGIEDV-060	SRR26202611	Bangladesh	2020	BD-1.2	This Study
NGIEDV-061	SRR26202610	Bangladesh	2020	BD-1.2	This Study
NGIEDV-062	SRR26202608	Bangladesh	2020	BD-1.2	This Study
NGIEDV-063	SRR26202607	Bangladesh	2020	BD-1.2	This Study
NGIEDV-064	SRR26202606	Bangladesh	2021	BD-1.2	This Study
NGIEDV-065	SRR26202605	Bangladesh	2021	BD-1.2	This Study
NGIEDV-066	SRR26202604	Bangladesh	2021	BD-1.2	This Study
NGIEDV-067	SRR26202603	Bangladesh	2021	BD-1.2	This Study
NGIEDV-068	SRR26202602	Bangladesh	2021	BD-1.2	This Study
NGIEDV-069	SRR26202601	Bangladesh	2021	BD-1.2	This Study
NGIEDV-070	SRR26202600	Bangladesh	2021	BD-1.2	This Study
NGIEDV-074	SRR26202599	Bangladesh	2021	BD-1.2	This Study
NGIEDV-075	SRR26202724	Bangladesh	2021	BD-1.2	This Study
NGIEDV-076	SRR26202723	Bangladesh	2021	BD-1.2	This Study
NGIEDV-077	SRR26202722	Bangladesh	2021	BD-1.2	This Study
NGIEDV-078	SRR26202721	Bangladesh	2021	BD-1.2	This Study
NGIEDV-079	SRR26202720	Bangladesh	2021	BD-1.2	This Study
NGIEDV-080	SRR26202719	Bangladesh	2021	BD-1.2	This Study
NGIEDV-082	SRR26202718	Bangladesh	2021	BD-1.2	This Study
NGIEDV-086	SRR26202717	Bangladesh	2021	BD-1.2	This Study
NGIEDV-087	SRR26202716	Bangladesh	2021	BD-1.2	This Study
NGIEDV-088	SRR26202715	Bangladesh	2021	BD-1.2	This Study
NGIEDV-089	SRR26202713	Bangladesh	2021	BD-1.2	This Study
NGIEDV-090	SRR26202712	Bangladesh	2021	BD-1.2	This Study
NGIEDV-093	SRR26202711	Bangladesh	2021	BD-1.2	This Study
NGIEDV-094	SRR26202710	Bangladesh	2021	BD-1.2	This Study
NGIEDV-095	SRR26202709	Bangladesh	2021	BD-1.2	This Study
NGIEDV-096	SRR26202708	Bangladesh	2021	BD-1.2	This Study
NGIEDV-097	SRR26202707	Bangladesh	2021	BD-1.2	This Study
NGIEDV-100	SRR26202706	Bangladesh	2021	BD-1.2	This Study
NGIEDV-102	SRR26202705	Bangladesh	2021	BD-1.2	This Study
NGIEDV-103	SRR26202704	Bangladesh	2021	BD-1.2	This Study
NGIEDV-104	SRR26202702	Bangladesh	2021	BD-1.2	This Study
NGIEDV-105	SRR26202701	Bangladesh	2021	BD-1.2	This Study
NGIEDV-106	SRR26202700	Bangladesh	2021	BD-1.2	This Study
NGIEDV-108	SRR26202699	Bangladesh	2021	BD-1.2	This Study
NGIEDV-109	SRR26202698	Bangladesh	2021	BD-1.2	This Study
NGIEDV-110	SRR26202697	Bangladesh	2021	BD-1.2	This Study
NGIEDV-111	SRR26202696	Bangladesh	2021	BD-1.2	This Study
NGIEDV-112	SRR26202695	Bangladesh	2021	BD-1.2	This Study
NGIEDV-113	SRR26202694	Bangladesh	2021	BD-1.2	This Study
