# Supplementary material for: Signature genomic traits of the core and accessory genome of Vibrio Cholerae O1 drive lineage transmission and disease severity
Source: Research Square preprint supplement (doi:10.21203/rs.3.rs-4184222/v1), 2024-04-05
Supplement: Supplementary file 7 [file 667e5cfe068bcb4902174f33.xlsx]

## Sheet: Vibrio_metadata
Isolate IDs		Sample Information				Isolate Typing		AST								AMR Genes (based on CARD database accessed 04-11-2023, min coverage 90%, min identity 90%)																	Virulence Genes (based on VFDB database accessed 04-11-2023, min coverage 70%, min identity 90%)
Strain ID	Lineage	data_group	Location	Division	Collection Date	Serotype	MLST	AMP	CIP	TE	SXT	E	AZM	DO	MEM	Number of ARGs	AAC(6')-Ib-cr (aacA4)	APH(3'')-Ib (neo)	APH(6)-Id (group_370)	OXA-1 (bla)	PER-3 (per1)	Vibrio_cholerae_varG (group_3952)	almG (lpxM_1)	almE (dltA_2)	catB3 (group_989)	catB9 (cat_2)	dfrA1 (dhfrI)	floR (bcr_2)	sul1 (folP_3)	sul2 (folP_2)	tetR (in Vibrio cholerae SXT element)	tet(59) (tetA)	Number of virulence genes	VCA0109	VCA0122	ace	acfA	acfB	acfC	acfD	clpB/vasG	cqsA	ctxA	ctxB	hcp-2	hlyA	icmF/vasK	luxS	rtxA
NGICDV-001	BD-2	icddr,b	Habiganj	Sylhet	2015-09-18	Ogawa	69	R	S	R	R	I	I	R	R	10	0	1	1	0	0	1	1	1	0	1	1	0	0	1	1	1	49	1	1	1	1	1	1	1	1	1	1	1	1	1	1	1	1
NGICDV-002	BD-2	icddr,b	Darus Salam	Dhaka	2015-10-08	Ogawa	69	R	S	R	R	I	S	R	S	10	0	1	1	0	0	1	1	1	0	1	1	0	0	1	1	1	49	1	1	1	1	1	1	1	1	1	1	1	1	1	1	1	1
NGICDV-003	BD-2	icddr,b	Narsingdi	Dhaka	2015-10-18	Ogawa	69	R	S	R	R	I	S	R	R	10	0	1	1	0	0	1	1	1	0	1	1	0	0	1	1	1	49	1	1	1	1	1	1	1	1	1	1	1	1	1	1	1	1
NGICDV-005	BD-2	icddr,b	Darus Salam	Dhaka	2015-10-24	Ogawa	69	R	S	R	R	R	I	R	R	10	0	1	1	0	0	1	1	1	0	1	1	0	0	1	1	1	49	1	1	1	1	1	1	1	1	1	1	1	1	1	1	1	1
NGICDV-011	BD-2	icddr,b	Darus Salam	Dhaka	18/11/2015	Ogawa	69	R	S	R	R	R	S	R	S	10	0	1	1	0	0	1	1	1	0	1	1	0	0	1	1	1	49	1	1	1	1	1	1	1	1	1	1	1	1	1	1	1	1
NGICDV-012	BD-2	icddr,b	Dakshinkhan	Dhaka	20/11/2015	Ogawa	69	R	S	R	R	R	I	R	S	10	0	1	1	0	0	1	1	1	0	1	1	0	0	1	1	1	49	1	1	1	1	1	1	1	1	1	1	1	1	1	1	1	1
NGICDV-013	BD-2	icddr,b	Dakshinkhan	Dhaka	22/11/2015	Inaba	69	R	S	R	R	I	S	R	S	10	0	1	1	0	0	1	1	1	0	1	1	0	0	1	1	1	49	1	1	1	1	1	1	1	1	1	1	1	1	1	1	1	1
NGICDV-014	BD-2	icddr,b	Kamrangirchar	Dhaka	4/12/2015	Ogawa	69	R	S	R	R	R	I	R	S	10	0	1	1	0	0	1	1	1	0	1	1	0	0	1	1	1	49	1	1	1	1	1	1	1	1	1	1	1	1	1	1	1	1
NGICDV-015	BD-2	icddr,b	Gulshan	Dhaka	4/12/2015	Ogawa	69	R	S	R	R	R	I	R	R	10	0	1	1	0	0	1	1	1	0	1	1	0	0	1	1	1	49	1	1	1	1	1	1	1	1	1	1	1	1	1	1	1	1
NGICDV-017	BD-2	icddr,b	Jatrabari	Dhaka	16/12/2015	Inaba	69	R	S	R	R	R	I	R	S	10	0	1	1	0	0	1	1	1	0	1	1	0	0	1	1	1	49	1	1	1	1	1	1	1	1	1	1	1	1	1	1	1	1
NGICDV-018	BD-2	icddr,b	Joydebpur/Gazipur	Dhaka	26/12/2015	Inaba	69	S	S	R	R	I	S	R	R	10	0	1	1	0	0	1	1	1	0	1	1	0	0	1	1	1	49	1	1	1	1	1	1	1	1	1	1	1	1	1	1	1	1
NGICDV-019	BD-2	icddr,b	Motijheel	Dhaka	2015-10-03	Ogawa	69	R	S	R	R	R	S	R	S	10	0	1	1	0	0	1	1	1	0	1	1	0	0	1	1	1	49	1	1	1	1	1	1	1	1	1	1	1	1	1	1	1	1
NGICDV-020	BD-2	icddr,b	Narsingdi	Dhaka	13/11/2015	Ogawa	69	I	S	R	R	I	S	R	S	10	0	1	1	0	0	1	1	1	0	1	1	0	0	1	1	1	49	1	1	1	1	1	1	1	1	1	1	1	1	1	1	1	1
NGICDV-025	BD-2	icddr,b	Habiganj	Sylhet	2016-07-20	Inaba	69	I	S	R	R	I	S	R	S	10	0	1	1	0	0	1	1	1	0	1	1	0	0	1	1	1	49	1	1	1	1	1	1	1	1	1	1	1	1	1	1	1	1
NGICDV-026	BD-2	icddr,b	Habiganj	Sylhet	2016-07-30	Inaba	69	R	S	R	R	R	R	R	S	10	0	1	1	0	0	1	1	1	0	1	1	0	0	1	1	1	49	1	1	1	1	1	1	1	1	1	1	1	1	1	1	1	1
NGICDV-027	BD-2	icddr,b	Habiganj	Sylhet	2016-08-20	Inaba	69	I	S	R	R	I	I	R	S	10	0	1	1	0	0	1	1	1	0	1	1	0	0	1	1	1	49	1	1	1	1	1	1	1	1	1	1	1	1	1	1	1	1
NGICDV-029	BD-2	icddr,b	Habiganj	Sylhet	2016-08-28	Inaba	69	I	S	R	R	I	I	R	S	10	0	1	1	0	0	1	1	1	0	1	1	0	0	1	1	1	49	1	1	1	1	1	1	1	1	1	1	1	1	1	1	1	1
NGICDV-030	BD-2	icddr,b	Habiganj	Sylhet	2016-09-01	Inaba	69	I	S	R	R	I	S	R	S	10	0	1	1	0	0	1	1	1	0	1	1	0	0	1	1	1	48	1	1	1	1	1	1	1	1	1	1	1	1	1	1	1	1
NGICDV-031	BD-2	icddr,b	Tongi	Dhaka	2016-01-17	Inaba	69	I	S	R	R	I	S	R	S	10	0	1	1	0	0	1	1	1	0	1	1	0	0	1	1	1	49	1	1	1	1	1	1	1	1	1	1	1	1	1	1	1	1
NGICDV-032	BD-2	icddr,b	Khilgaon	Dhaka	2016-01-18	Inaba	69	S	S	R	R	I	S	I	I	10	0	1	1	0	0	1	1	1	0	1	1	0	0	1	1	1	49	1	1	1	1	1	1	1	1	1	1	1	1	1	1	1	1
NGICDV-033	BD-1.2	icddr,b	Tongi	Dhaka	2016-01-24	Ogawa	69	I	S	S	R	I	S	S	S	5	0	0	0	0	0	1	1	1	0	1	1	0	0	0	0	0	49	1	1	1	1	1	1	1	1	1	1	1	1	1	1	1	1
NGICDV-034	BD-2	icddr,b	lalbagh	Dhaka	2016-03-17	Inaba	69	S	S	R	R	I	S	I	I	10	0	1	1	0	0	1	1	1	0	1	1	0	0	1	1	1	49	1	1	1	1	1	1	1	1	1	1	1	1	1	1	1	1
NGICDV-035	BD-2	icddr,b	Ramna	Dhaka	2016-03-23	Inaba	69	S	S	R	R	I	S	R	R	10	0	1	1	0	0	1	1	1	0	1	1	0	0	1	1	1	49	1	1	1	1	1	1	1	1	1	1	1	1	1	1	1	1
NGICDV-036	BD-2	icddr,b	Dakshinkhan	Dhaka	2016-03-27	Inaba	69	R	S	R	R	I	S	R	R	10	0	1	1	0	0	1	1	1	0	1	1	0	0	1	1	1	49	1	1	1	1	1	1	1	1	1	1	1	1	1	1	1	1
NGICDV-037	BD-2	icddr,b	Fatullah	Dhaka	2016-04-04	Inaba	69	S	S	R	R	I	R	R	R	10	0	1	1	0	0	1	1	1	0	1	1	0	0	1	1	1	49	1	1	1	1	1	1	1	1	1	1	1	1	1	1	1	1
NGICDV-038	BD-2	icddr,b	Mohammadpur	Dhaka	2016-04-11	Inaba	69	I	S	R	R	R	R	R	R	10	0	1	1	0	0	1	1	1	0	1	1	0	0	1	1	1	49	1	1	1	1	1	1	1	1	1	1	1	1	1	1	1	1
NGICDV-039	BD-2	icddr,b	Demra	Dhaka	2016-07-17	Inaba	69	I	S	R	R	I	R	R	R	10	0	1	1	0	0	1	1	1	0	1	1	0	0	1	1	1	49	1	1	1	1	1	1	1	1	1	1	1	1	1	1	1	1
NGICDV-040	BD-2	icddr,b	Mirpur	Dhaka	2016-09-05	Inaba	69	I	S	R	R	I	I	R	R	10	0	1	1	0	0	1	1	1	0	1	1	0	0	1	1	1	49	1	1	1	1	1	1	1	1	1	1	1	1	1	1	1	1
NGICDV-041	BD-2	icddr,b	BITID,Chattogram	Chittagong	2017-02-12	Inaba	69	I	S	R	R	I	I	R	R	10	0	1	1	0	0	1	1	1	0	1	1	0	0	1	1	1	49	1	1	1	1	1	1	1	1	1	1	1	1	1	1	1	1
NGICDV-042	BD-2	icddr,b	BITID,Chattogram	Chittagong	2017-05-06	Inaba	69	I	S	R	R	I	I	R	R	10	0	1	1	0	0	1	1	1	0	1	1	0	0	1	1	1	49	1	1	1	1	1	1	1	1	1	1	1	1	1	1	1	1
NGICDV-043	BD-2	icddr,b	BITID,Chattogram	Chittagong	2017-06-07	Inaba	69	R	S	R	R	I	I	R	R	10	0	1	1	0	0	1	1	1	0	1	1	0	0	1	1	1	49	1	1	1	1	1	1	1	1	1	1	1	1	1	1	1	1
NGICDV-044	BD-2	icddr,b	BITID,Chattogram	Chittagong	2017-11-11	Inaba	69	R	S	R	R	R	I	R	R	10	0	1	1	0	0	1	1	1	0	1	1	0	0	1	1	1	49	1	1	1	1	1	1	1	1	1	1	1	1	1	1	1	1
NGICDV-047	BD-2	icddr,b	Habiganj	Sylhet	2017-04-01	Inaba	69	R	S	R	R	I	S	R	R	10	0	1	1	0	0	1	1	1	0	1	1	0	0	1	1	1	49	1	1	1	1	1	1	1	1	1	1	1	1	1	1	1	1
NGICDV-048	BD-2	icddr,b	DMCH,Dhaka	Dhaka	2017-04-15	Inaba	69	I	S	R	R	I	I	R	R	10	0	1	1	0	0	1	1	1	0	1	1	0	0	1	1	1	49	1	1	1	1	1	1	1	1	1	1	1	1	1	1	1	1
NGICDV-049	BD-2	icddr,b	Tangail	Dhaka	2017-03-14	Inaba	69	I	S	R	R	I	I	R	R	10	0	1	1	0	0	1	1	1	0	1	1	0	0	1	1	1	49	1	1	1	1	1	1	1	1	1	1	1	1	1	1	1	1
NGICDV-050	BD-1.2	icddr,b	Shibganj	Rajshahi	2017-07-12	Ogawa	69	R	S	S	R	R	S	I	I	9	0	1	1	0	0	1	1	1	0	1	1	1	0	1	0	0	49	1	1	1	1	1	1	1	1	1	1	1	1	1	1	1	1
NGICDV-051	BD-2	icddr,b	Ramna	Dhaka	2017-03-04	Inaba	69	R	S	R	R	I	I	R	R	10	0	1	1	0	0	1	1	1	0	1	1	0	0	1	1	1	49	1	1	1	1	1	1	1	1	1	1	1	1	1	1	1	1
NGICDV-052	BD-2	icddr,b	Jatrabari	Dhaka	2017-03-20	Inaba	69	R	S	R	R	R	I	R	R	10	0	1	1	0	0	1	1	1	0	1	1	0	0	1	1	1	49	1	1	1	1	1	1	1	1	1	1	1	1	1	1	1	1
NGICDV-053	BD-2	icddr,b	Rampura	Dhaka	2017-03-21	Inaba	69	I	S	R	R	R	I	R	R	10	0	1	1	0	0	1	1	1	0	1	1	0	0	1	1	1	49	1	1	1	1	1	1	1	1	1	1	1	1	1	1	1	1
NGICDV-054	BD-2	icddr,b	Bandar	Dhaka	2017-03-30	Inaba	69	R	S	R	R	R	I	R	R	10	0	1	1	0	0	1	1	1	0	1	1	0	0	1	1	1	49	1	1	1	1	1	1	1	1	1	1	1	1	1	1	1	1
NGICDV-055	BD-2	icddr,b	Keraniganj	Dhaka	2017-03-31	Inaba	69	R	S	R	R	I	I	R	R	10	0	1	1	0	0	1	1	1	0	1	1	0	0	1	1	1	49	1	1	1	1	1	1	1	1	1	1	1	1	1	1	1	1
NGICDV-056	BD-2	icddr,b	Badda	Dhaka	2017-03-31	Inaba	69	R	S	R	R	R	I	R	R	10	0	1	1	0	0	1	1	1	0	1	1	0	0	1	1	1	49	1	1	1	1	1	1	1	1	1	1	1	1	1	1	1	1
NGICDV-058	BD-2	icddr,b	Kotwali	Dhaka	2017-04-09	Inaba	69	R	S	R	R	R	R	R	R	10	0	1	1	0	0	1	1	1	0	1	1	0	0	1	1	1	49	1	1	1	1	1	1	1	1	1	1	1	1	1	1	1	1
NGICDV-061	BD-1.2	icddr,b	Tangail	Dhaka	2018-04-25	Ogawa	69	R	S	S	R	I	I	S	S	9	0	1	1	0	0	1	1	1	0	1	1	1	0	1	0	0	49	1	1	1	1	1	1	1	1	1	1	1	1	1	1	1	1
NGICDV-062	BD-1.2	icddr,b	Tangail	Dhaka	2018-09-24	Ogawa	69	R	S	S	R	I	I	S	S	9	0	1	1	0	0	1	1	1	0	1	1	1	0	1	0	0	49	1	1	1	1	1	1	1	1	1	1	1	1	1	1	1	1
NGICDV-063	BD-1.2	icddr,b	Tangail	Dhaka	2018-09-29	Ogawa	69	R	S	S	R	I	I	S	S	9	0	1	1	0	0	1	1	1	0	1	1	1	0	1	0	0	49	1	1	1	1	1	1	1	1	1	1	1	1	1	1	1	1
NGICDV-065	BD-1.2	icddr,b	Narayanganj	Dhaka	2018-11-26	Ogawa	69	R	S	S	R	I	S	S	S	9	0	1	1	0	0	1	1	1	0	1	1	1	0	1	0	0	49	1	1	1	1	1	1	1	1	1	1	1	1	1	1	1	1
NGICDV-066	BD-2	icddr,b	Narayanganj	Dhaka	2018-12-08	Ogawa	69	R	S	S	R	I	I	S	S	7	0	1	1	0	0	1	1	1	0	1	1	0	0	0	0	0	49	1	1	1	1	1	1	1	1	1	1	1	1	1	1	1	1
NGICDV-067	BD-2	icddr,b	Chuadanga	Khulna	2018-01-03	Inaba	69	I	S	S	R	I	S	S	S	10	0	1	1	0	0	1	1	1	0	1	1	0	0	1	1	1	49	1	1	1	1	1	1	1	1	1	1	1	1	1	1	1	1
NGICDV-071	BD-1.2	icddr,b	Chawkbazar	Dhaka	2018-05-06	Ogawa	69	I	S	S	R	I	S	S	S	9	0	1	1	0	0	1	1	1	0	1	1	1	0	1	0	0	49	1	1	1	1	1	1	1	1	1	1	1	1	1	1	1	1
NGICDV-072	BD-1.2	icddr,b	Bangshal	Dhaka	2018-05-07	Ogawa	69	R	S	S	R	I	S	S	S	9	0	1	1	0	0	1	1	1	0	1	1	1	0	1	0	0	49	1	1	1	1	1	1	1	1	1	1	1	1	1	1	1	1
NGICDV-073	BD-1.2	icddr,b	Shampur	Dhaka	2018-05-08	Ogawa	69	I	S	S	R	I	S	S	S	9	0	1	1	0	0	1	1	1	0	1	1	1	0	1	0	0	49	1	1	1	1	1	1	1	1	1	1	1	1	1	1	1	1
NGICDV-074	BD-1.2	icddr,b	Mohammadpur	Dhaka	2018-05-26	Ogawa	69	R	S	S	R	I	S	S	S	9	0	1	1	0	0	1	1	1	0	1	1	1	0	1	0	0	49	1	1	1	1	1	1	1	1	1	1	1	1	1	1	1	1
NGICDV-075	BD-1.2	icddr,b	Siddhirganj	Dhaka	2018-07-04	Ogawa	69	I	S	S	R	I	S	S	S	10	0	1	1	1	0	1	1	1	0	1	1	1	0	1	0	0	49	1	1	1	1	1	1	1	1	1	1	1	1	1	1	1	1
NGICDV-076	BD-1.2	icddr,b	Jatrabari	Dhaka	2018-07-25	Ogawa	69	R	S	S	R	I	S	S	S	9	0	1	1	0	0	1	1	1	0	1	1	1	0	1	0	0	49	1	1	1	1	1	1	1	1	1	1	1	1	1	1	1	1
NGICDV-077	BD-1.2	icddr,b	Dakshinkhan	Dhaka	2018-09-28	Ogawa	69	I	S	S	R	I	S	S	S	9	0	1	1	0	0	1	1	1	0	1	1	1	0	1	0	0	49	1	1	1	1	1	1	1	1	1	1	1	1	1	1	1	1
NGICDV-078	BD-1.2	icddr,b	Kadamtali	Dhaka	2018-09-30	Ogawa	69	R	S	S	R	I	S	S	S	9	0	1	1	0	0	1	1	1	0	1	1	1	0	1	0	0	49	1	1	1	1	1	1	1	1	1	1	1	1	1	1	1	1
NGICDV-079	BD-1.2	icddr,b	Mohammadpur	Dhaka	2018-04-28	Ogawa	69	I	S	S	R	I	S	S	S	9	0	1	1	0	0	1	1	1	0	1	1	1	0	1	0	0	49	1	1	1	1	1	1	1	1	1	1	1	1	1	1	1	1
NGICDV-080	BD-1.2	icddr,b	Mirpur	Dhaka	2018-11-04	Ogawa	69	I	S	S	R	I	S	S	S	9	0	1	1	0	0	1	1	1	0	1	1	1	0	1	0	0	49	1	1	1	1	1	1	1	1	1	1	1	1	1	1	1	1
NGICDV-081	BD-2	icddr,b	Naogaon	Rajshahi	2019-02-03	Inaba	69	R	R	R	R	R	I	R	R	14	1	1	1	0	1	1	1	1	1	1	1	0	1	1	1	1	49	1	1	1	1	1	1	1	1	1	1	1	1	1	1	1	1
NGICDV-082	BD-1.2	icddr,b	Naogaon	Rajshahi	2019-11-03	Ogawa	69	R	S	S	R	I	S	S	S	9	0	1	1	0	0	1	1	1	0	1	1	1	0	1	0	0	49	1	1	1	1	1	1	1	1	1	1	1	1	1	1	1	1
NGICDV-084	BD-2	icddr,b	Naogaon	Rajshahi	2019-07-16	Ogawa	69	R	S	S	R	I	R	S	S	10	0	1	1	0	0	1	1	1	0	1	1	0	0	1	1	1	49	1	1	1	1	1	1	1	1	1	1	1	1	1	1	1	1
NGICDV-085	BD-1.2	icddr,b	DMCH,Dhaka	Dhaka	2019-12-28	Inaba	69	I	S	S	R	R	I	S	S	9	0	1	1	0	0	1	1	1	0	1	1	1	0	1	0	0	49	1	1	1	1	1	1	1	1	1	1	1	1	1	1	1	1
NGICDV-086	BD-1.2	icddr,b	DMCH,Dhaka	Dhaka	2019-11-13	Ogawa	69	I	S	S	R	I	S	S	S	9	0	1	1	0	0	1	1	1	0	1	1	1	0	1	0	0	49	1	1	1	1	1	1	1	1	1	1	1	1	1	1	1	1
NGICDV-087	BD-1.2	icddr,b	BITID,Chattogram	Chittagong	2019-04-27	Ogawa	69	I	S	S	R	I	I	S	S	9	0	1	1	0	0	1	1	1	0	1	1	1	0	1	0	0	49	1	1	1	1	1	1	1	1	1	1	1	1	1	1	1	1
NGICDV-088	BD-1.2	icddr,b	BITID,Chattogram	Chittagong	2019-06-24	Ogawa	69	R	S	S	R	I	I	S	S	7	0	0	0	0	0	1	1	1	0	1	1	1	0	1	0	0	49	1	1	1	1	1	1	1	1	1	1	1	1	1	1	1	1
NGICDV-090	BD-1.2	icddr,b	Chowgasa,Jessore	Khulna	2019-11-13	Ogawa	69	I	S	S	R	I	I	S	S	9	0	1	1	0	0	1	1	1	0	1	1	1	0	1	0	0	49	1	1	1	1	1	1	1	1	1	1	1	1	1	1	1	1
NGICDV-091	BD-1.2	icddr,b	Bangshal	Dhaka	2019-05-21	Ogawa	69	I	S	S	R	I	S	S	S	9	0	1	1	0	0	1	1	1	0	1	1	1	0	1	0	0	49	1	1	1	1	1	1	1	1	1	1	1	1	1	1	1	1
NGICDV-092	BD-1.2	icddr,b	Dakshinkhan	Dhaka	2019-05-23	Ogawa	69	I	S	S	R	I	S	S	S	9	0	1	1	0	0	1	1	1	0	1	1	1	0	1	0	0	49	1	1	1	1	1	1	1	1	1	1	1	1	1	1	1	1
NGICDV-095	BD-1.2	icddr,b	Khilkhet	Dhaka	2019-04-12	Ogawa	69	R	S	S	R	I	S	S	S	9	0	1	1	0	0	1	1	1	0	1	1	1	0	1	0	0	49	1	1	1	1	1	1	1	1	1	1	1	1	1	1	1	1
NGICDV-096	BD-1.2	icddr,b	Joydebpur/Gazipur	Dhaka	2019-04-20	Ogawa	69	I	S	S	R	I	S	S	S	9	0	1	1	0	0	1	1	1	0	1	1	1	0	1	0	0	49	1	1	1	1	1	1	1	1	1	1	1	1	1	1	1	1
NGICDV-097	BD-1.2	icddr,b	Lalbagh	Dhaka	2019-06-02	Ogawa	69	I	S	S	R	I	S	S	S	9	0	1	1	0	0	1	1	1	0	1	1	1	0	1	0	0	49	1	1	1	1	1	1	1	1	1	1	1	1	1	1	1	1
NGICDV-098	BD-1.2	icddr,b	Mohammadpur	Dhaka	2019-06-02	Ogawa	69	I	S	S	R	I	S	S	S	9	0	1	1	0	0	1	1	1	0	1	1	1	0	1	0	0	49	1	1	1	1	1	1	1	1	1	1	1	1	1	1	1	1
NGIEDV-007	BD-1.2	IEDCR	Narayanganj	Dhaka	2020-05-11	Inaba	69	I	S	S	R	I	S	S	S	9	0	1	1	0	0	1	1	1	0	1	1	1	0	1	0	0	49	1	1	1	1	1	1	1	1	1	1	1	1	1	1	1	1
NGIEDV-017	BD-1.2	IEDCR	Narayanganj	Dhaka	16/11/2020	Inaba	69	R	S	R	S	R	R	R	S	9	0	1	1	0	0	1	1	1	0	1	1	1	0	1	0	0	49	1	1	1	1	1	1	1	1	1	1	1	1	1	1	1	1
NGIEDV-025	BD-1.2	IEDCR	Narayanganj	Dhaka	16/11/2020	Inaba	69	R	S	S	R	S	S	S	S	9	0	1	1	0	0	1	1	1	0	1	1	1	0	1	0	0	49	1	1	1	1	1	1	1	1	1	1	1	1	1	1	1	1
NGIEDV-027	BD-1.2	IEDCR	Narayanganj	Dhaka	2020-01-11	Inaba	69	R	S	S	R	I	S	S	S	9	0	1	1	0	0	1	1	1	0	1	1	1	0	1	0	0	49	1	1	1	1	1	1	1	1	1	1	1	1	1	1	1	1
NGIEDV-028	BD-1.2	IEDCR	Narayanganj	Dhaka	2020-01-11	Inaba	69	R	S	S	R	I	S	S	S	9	0	1	1	0	0	1	1	1	0	1	1	1	0	1	0	0	49	1	1	1	1	1	1	1	1	1	1	1	1	1	1	1	1
NGIEDV-029	BD-1.2	IEDCR	Narayanganj	Dhaka	2020-01-11	Inaba	69	R	I	S	R	I	S	S	S	9	0	1	1	0	0	1	1	1	0	1	1	1	0	1	0	0	49	1	1	1	1	1	1	1	1	1	1	1	1	1	1	1	1
NGIEDV-039	BD-1.2	IEDCR	Narayanganj	Dhaka	2020-07-12	Inaba	69	R	S	S	R	I	S	S	S	9	0	1	1	0	0	1	1	1	0	1	1	1	0	1	0	0	49	1	1	1	1	1	1	1	1	1	1	1	1	1	1	1	1
NGIEDV-044	BD-1.2	IEDCR	Narayanganj	Dhaka	2020-07-12	Ogawa	69	I	S	S	R	I	S	S	S	9	0	1	1	0	0	1	1	1	0	1	1	1	0	1	0	0	49	1	1	1	1	1	1	1	1	1	1	1	1	1	1	1	1
NGIEDV-046	BD-1.2	IEDCR	Narayanganj	Dhaka	2020-07-12	Inaba	69	R	S	S	R	I	S	S	S	9	0	1	1	0	0	1	1	1	0	1	1	1	0	1	0	0	49	1	1	1	1	1	1	1	1	1	1	1	1	1	1	1	1
NGIEDV-047	BD-1.2	IEDCR	Narayanganj	Dhaka	2020-07-12	Inaba	69	R	S	S	R	I	S	S	S	9	0	1	1	0	0	1	1	1	0	1	1	1	0	1	0	0	49	1	1	1	1	1	1	1	1	1	1	1	1	1	1	1	1
NGIEDV-048	BD-1.2	IEDCR	Narayanganj	Dhaka	2020-07-12	Inaba	69	I	S	S	R	I	S	S	S	9	0	1	1	0	0	1	1	1	0	1	1	1	0	1	0	0	49	1	1	1	1	1	1	1	1	1	1	1	1	1	1	1	1
NGIEDV-049	BD-1.2	IEDCR	Narayanganj	Dhaka	2020-07-12	Inaba	69	R	S	S	R	I	S	S	S	9	0	1	1	0	0	1	1	1	0	1	1	1	0	1	0	0	49	1	1	1	1	1	1	1	1	1	1	1	1	1	1	1	1
NGIEDV-057	BD-1.2	IEDCR	Narayanganj	Dhaka	22/12/2021	Ogawa	69	R	S	S	R	I	S	S	S	9	0	1	1	0	0	1	1	1	0	1	1	1	0	1	0	0	49	1	1	1	1	1	1	1	1	1	1	1	1	1	1	1	1
NGIEDV-058	BD-1.2	IEDCR	Narayanganj	Dhaka	22/12/2021	Ogawa	69	S	R	R	R	R	R	R	S	9	0	1	1	0	0	1	1	1	0	1	1	1	0	1	0	0	49	1	1	1	1	1	1	1	1	1	1	1	1	1	1	1	1
NGIEDV-059	BD-1.2	IEDCR	Narayanganj	Dhaka	22/12/2021	Ogawa	69	S	R	R	R	R	R	R	S	9	0	1	1	0	0	1	1	1	0	1	1	1	0	1	0	0	49	1	1	1	1	1	1	1	1	1	1	1	1	1	1	1	1
NGIEDV-060	BD-1.2	IEDCR	Narayanganj	Dhaka	22/12/2021	Inaba	69	R	R	R	R	R	R	R	S	9	0	1	1	0	0	1	1	1	0	1	1	1	0	1	0	0	49	1	1	1	1	1	1	1	1	1	1	1	1	1	1	1	1
NGIEDV-061	BD-1.2	IEDCR	Narayanganj	Dhaka	22/12/2021	Inaba	69	R	S	S	R	I	S	S	S	9	0	1	1	0	0	1	1	1	0	1	1	1	0	1	0	0	49	1	1	1	1	1	1	1	1	1	1	1	1	1	1	1	1
NGIEDV-062	BD-1.2	IEDCR	Narayanganj	Dhaka	22/12/2021	Inaba	69	R	S	S	R	I	S	S	S	9	0	1	1	0	0	1	1	1	0	1	1	1	0	1	0	0	49	1	1	1	1	1	1	1	1	1	1	1	1	1	1	1	1
NGIEDV-063	BD-1.2	IEDCR	Narayanganj	Dhaka	22/12/2021	Inaba	69	I	S	S	R	I	S	S	S	9	0	1	1	0	0	1	1	1	0	1	1	1	0	1	0	0	49	1	1	1	1	1	1	1	1	1	1	1	1	1	1	1	1
NGIEDV-064	BD-1.2	IEDCR	Narayanganj	Dhaka	2021-04-02	Inaba	69	R	S	S	R	I	S	S	S	5	0	0	0	0	0	1	1	1	0	1	1	0	0	0	0	0	49	1	1	1	1	1	1	1	1	1	1	1	1	1	1	1	1
NGIEDV-065	BD-1.2	IEDCR	Narayanganj	Dhaka	2021-04-02	Ogawa	69	R	S	S	R	S	S	S	S	9	0	1	1	0	0	1	1	1	0	1	1	1	0	1	0	0	49	1	1	1	1	1	1	1	1	1	1	1	1	1	1	1	1
NGIEDV-066	BD-1.2	IEDCR	Narayanganj	Dhaka	2021-04-02	Inaba	69	R	S	S	R	S	S	S	S	9	0	1	1	0	0	1	1	1	0	1	1	1	0	1	0	0	49	1	1	1	1	1	1	1	1	1	1	1	1	1	1	1	1
NGIEDV-067	BD-1.2	IEDCR	Narayanganj	Dhaka	2021-04-02	Inaba	69	R	S	S	R	S	S	S	S	9	0	1	1	0	0	1	1	1	0	1	1	1	0	1	0	0	49	1	1	1	1	1	1	1	1	1	1	1	1	1	1	1	1
NGIEDV-068	BD-1.2	IEDCR	Narayanganj	Dhaka	2021-04-02	Inaba	69	R	S	S	R	S	S	S	S	9	0	1	1	0	0	1	1	1	0	1	1	1	0	1	0	0	49	1	1	1	1	1	1	1	1	1	1	1	1	1	1	1	1
NGIEDV-069	BD-1.2	IEDCR	Narayanganj	Dhaka	2021-04-02	Inaba	69	I	S	S	R	S	S	S	S	9	0	1	1	0	0	1	1	1	0	1	1	1	0	1	0	0	49	1	1	1	1	1	1	1	1	1	1	1	1	1	1	1	1
NGIEDV-070	BD-1.2	IEDCR	Narayanganj	Dhaka	2021-04-02	Inaba	69	R	S	S	R	S	S	S	S	9	0	1	1	0	0	1	1	1	0	1	1	1	0	1	0	0	49	1	1	1	1	1	1	1	1	1	1	1	1	1	1	1	1
NGIEDV-074	BD-1.2	IEDCR	Narayanganj	Dhaka	2021-02-03	Inaba	69	I	S	S	R	S	S	S	S	9	0	1	1	0	0	1	1	1	0	1	1	1	0	1	0	0	49	1	1	1	1	1	1	1	1	1	1	1	1	1	1	1	1
NGIEDV-075	BD-1.2	IEDCR	Narayanganj	Dhaka	2021-02-03	Inaba	69	R	S	S	R	S	S	S	S	9	0	1	1	0	0	1	1	1	0	1	1	1	0	1	0	0	48	1	1	1	1	1	1	1	1	1	1	1	1	1	1	1	1
NGIEDV-076	BD-1.2	IEDCR	Narayanganj	Dhaka	2021-02-03	Ogawa	69	R	S	S	R	S	S	S	S	9	0	1	1	0	0	1	1	1	0	1	1	1	0	1	0	0	45	1	1	0	1	1	1	1	1	1	0	0	1	1	1	1	1
NGIEDV-077	BD-1.2	IEDCR	Narayanganj	Dhaka	2021-02-03	Inaba	69	R	S	S	R	S	S	S	S	9	0	1	1	0	0	1	1	1	0	1	1	1	0	1	0	0	49	1	1	1	1	1	1	1	1	1	1	1	1	1	1	1	1
NGIEDV-078	BD-1.2	IEDCR	Narayanganj	Dhaka	2021-02-03	Ogawa	69	R	S	S	R	S	S	S	S	9	0	1	1	0	0	1	1	1	0	1	1	1	0	1	0	0	49	1	1	1	1	1	1	1	1	1	1	1	1	1	1	1	1
NGIEDV-079	BD-1.2	IEDCR	Narayanganj	Dhaka	2021-02-03	Inaba	69	R	S	S	R	S	S	S	S	9	0	1	1	0	0	1	1	1	0	1	1	1	0	1	0	0	49	1	1	1	1	1	1	1	1	1	1	1	1	1	1	1	1
NGIEDV-080	BD-1.2	IEDCR	Narayanganj	Dhaka	2021-02-03	Inaba	69	I	S	S	R	S	S	S	S	9	0	1	1	0	0	1	1	1	0	1	1	1	0	1	0	0	49	1	1	1	1	1	1	1	1	1	1	1	1	1	1	1	1
NGIEDV-082	BD-1.2	IEDCR	Narayanganj	Dhaka	21/03/2021	Inaba	69	R	S	S	R	S	S	S	S	9	0	1	1	0	0	1	1	1	0	1	1	1	0	1	0	0	49	1	1	1	1	1	1	1	1	1	1	1	1	1	1	1	1
NGIEDV-086	BD-1.2	IEDCR	Narayanganj	Dhaka	21/03/2021	Ogawa	69	I	S	S	R	S	S	S	S	9	0	1	1	0	0	1	1	1	0	1	1	1	0	1	0	0	49	1	1	1	1	1	1	1	1	1	1	1	1	1	1	1	1
NGIEDV-087	BD-1.2	IEDCR	Narayanganj	Dhaka	21/03/2021	Ogawa	69	R	S	S	R	S	S	S	S	9	0	1	1	0	0	1	1	1	0	1	1	1	0	1	0	0	49	1	1	1	1	1	1	1	1	1	1	1	1	1	1	1	1
NGIEDV-088	BD-1.2	IEDCR	Narayanganj	Dhaka	21/03/2021	Ogawa	69	I	S	S	R	S	S	S	S	9	0	1	1	0	0	1	1	1	0	1	1	1	0	1	0	0	49	1	1	1	1	1	1	1	1	1	1	1	1	1	1	1	1
NGIEDV-089	BD-1.2	IEDCR	Narayanganj	Dhaka	21/03/2021	Inaba	69	R	S	S	R	S	S	S	S	9	0	1	1	0	0	1	1	1	0	1	1	1	0	1	0	0	49	1	1	1	1	1	1	1	1	1	1	1	1	1	1	1	1
NGIEDV-090	BD-1.2	IEDCR	Narayanganj	Dhaka	21/03/2021	Ogawa	69	R	S	S	R	S	S	S	S	9	0	1	1	0	0	1	1	1	0	1	1	1	0	1	0	0	49	1	1	1	1	1	1	1	1	1	1	1	1	1	1	1	1
NGIEDV-093	BD-1.2	IEDCR	Narayanganj	Dhaka	21/03/2021	Inaba	69	R	S	S	R	I	S	S	S	9	0	1	1	0	0	1	1	1	0	1	1	1	0	1	0	0	49	1	1	1	1	1	1	1	1	1	1	1	1	1	1	1	1
NGIEDV-094	BD-1.2	IEDCR	Narayanganj	Dhaka	21/03/2021	Inaba	69	R	S	S	R	S	S	S	S	9	0	1	1	0	0	1	1	1	0	1	1	1	0	1	0	0	49	1	1	1	1	1	1	1	1	1	1	1	1	1	1	1	1
NGIEDV-095	BD-1.2	IEDCR	Narayanganj	Dhaka	21/03/2021	Ogawa	69	R	S	S	R	S	S	S	S	9	0	1	1	0	0	1	1	1	0	1	1	1	0	1	0	0	49	1	1	1	1	1	1	1	1	1	1	1	1	1	1	1	1
NGIEDV-096	BD-1.2	IEDCR	Narayanganj	Dhaka	2021-03-04	Inaba	69	R	S	S	R	I	S	S	S	9	0	1	1	0	0	1	1	1	0	1	1	1	0	1	0	0	49	1	1	1	1	1	1	1	1	1	1	1	1	1	1	1	1
NGIEDV-097	BD-1.2	IEDCR	Narayanganj	Dhaka	25/04/2021	Ogawa	69	R	S	S	R	I	S	S	S	9	0	1	1	0	0	1	1	1	0	1	1	1	0	1	0	0	49	1	1	1	1	1	1	1	1	1	1	1	1	1	1	1	1
NGIEDV-100	BD-1.2	IEDCR	Narayanganj	Dhaka	19/05/2021	Inaba	69	R	S	S	R	I	S	S	S	9	0	1	1	0	0	1	1	1	0	1	1	1	0	1	0	0	49	1	1	1	1	1	1	1	1	1	1	1	1	1	1	1	1
NGIEDV-102	BD-1.2	IEDCR	BARISAL	Barisal	25/04/2021	Ogawa	69	R	S	S	R	I	S	S	S	9	0	1	1	0	0	1	1	1	0	1	1	1	0	1	0	0	49	1	1	1	1	1	1	1	1	1	1	1	1	1	1	1	1
NGIEDV-103	BD-1.2	IEDCR	BARISAL	Barisal	25/04/2021	Ogawa	69	R	S	S	R	I	S	S	S	9	0	1	1	0	0	1	1	1	0	1	1	1	0	1	0	0	49	1	1	1	1	1	1	1	1	1	1	1	1	1	1	1	1
NGIEDV-104	BD-1.2	IEDCR	BARISAL	Barisal	25/04/2021	Inaba	69	R	S	S	R	I	S	S	S	9	0	1	1	0	0	1	1	1	0	1	1	1	0	1	0	0	49	1	1	1	1	1	1	1	1	1	1	1	1	1	1	1	1
NGIEDV-105	BD-1.2	IEDCR	BARISAL	Barisal	25/04/2021	Inaba	69	S	S	S	R	S	S	S	S	9	0	1	1	0	0	1	1	1	0	1	1	1	0	1	0	0	49	1	1	1	1	1	1	1	1	1	1	1	1	1	1	1	1
NGIEDV-106	BD-1.2	IEDCR	BARISAL	Barisal	25/04/2021	Inaba	69	R	S	S	R	S	S	S	S	5	0	0	0	0	0	1	1	1	0	1	1	0	0	0	0	0	49	1	1	1	1	1	1	1	1	1	1	1	1	1	1	1	1
NGIEDV-108	BD-1.2	IEDCR	BARISAL	Barisal	25/04/2021	Ogawa	69	R	S	S	R	I	S	S	S	9	0	1	1	0	0	1	1	1	0	1	1	1	0	1	0	0	49	1	1	1	1	1	1	1	1	1	1	1	1	1	1	1	1
NGIEDV-109	BD-1.2	IEDCR	BARISAL	Barisal	25/04/2021	Ogawa	69	R	S	S	R	I	S	S	S	9	0	1	1	0	0	1	1	1	0	1	1	1	0	1	0	0	49	1	1	1	1	1	1	1	1	1	1	1	1	1	1	1	1
NGIEDV-110	BD-1.2	IEDCR	BARISAL	Barisal	25/04/2021	Inaba	69	I	S	S	R	I	S	S	S	9	0	1	1	0	0	1	1	1	0	1	1	1	0	1	0	0	49	1	1	1	1	1	1	1	1	1	1	1	1	1	1	1	1
NGIEDV-111	BD-1.2	IEDCR	BARISAL	Barisal	25/04/2021	Ogawa	69	R	S	S	R	I	S	S	S	9	0	1	1	0	0	1	1	1	0	1	1	1	0	1	0	0	49	1	1	1	1	1	1	1	1	1	1	1	1	1	1	1	1
NGIEDV-112	BD-1.2	IEDCR	BARISAL	Barisal	25/04/2021	Inaba	69	R	S	S	R	S	S	S	S	9	0	1	1	0	0	1	1	1	0	1	1	1	0	1	0	0	49	1	1	1	1	1	1	1	1	1	1	1	1	1	1	1	1
NGIEDV-113	BD-1.2	IEDCR	BARISAL	Barisal	25/04/2021	Ogawa	69	R	S	S	R	S	S	S	S	9	0	1	1	0	0	1	1	1	0	1	1	1	0	1	0	0	49	1	1	1	1	1	1	1	1	1	1	1	1	1	1	1	1
[truncated: 33 more columns]

## Sheet: matched_genenames
ARGs in database	ARGs in our Vibrio cholerae	freq against 129 samples	identity(%)	coverage(%)
AAC(6')-Ib-cr	aacA4	1/129	99.83	100
APH(3'')-Ib	neo	125/129	99.75	100
APH(6)-Id	group_370	125/129	99.88	100
OXA-1	bla	1/129	99.88	100
PER-3	per1	1/129	100	100
Vibrio_cholerae_varG	group_3952	129/129	100	100
almG	lpxM_1	129/129	100	100
catB3	group_989	1/129	100	100
catB9	cat_2	129/129	100	100
dfrA1	dhfrI	129/129	99.79	100
floR	bcr_2	81/129	99.92	100
sul1	folP_3	1/129	100	100
sul2	folP_2	125/129	100	100
tet(59)	tetA	44/129	99.67	100
almE	dltA_2	129/129	98.56	100
tetR	tetR (in Vibrio cholerae SXT element)	44/129	99.67	100
