# Supplementary material for: Signature genomic traits of the core and accessory genome of Vibrio Cholerae O1 drive lineage transmission and disease severity
Source: Research Square preprint supplement (doi:10.21203/rs.3.rs-4184222/v1), 2024-04-05
Supplement: Supplementary file 9 [file cee9cb9b37a35489fc786dd3.xlsx]

## Sheet: Table S9
ID	Type	Symptoms	Feature Name	Protein names	Distance from downstream gene	Distance from upstream gene
group_798	accessory gene	Vomit, stools 11-15 times vs. 16-20 times, stools 11-15 times vs. 21+ times	group_798	IS1004 transposase
c01603	core genome snp	Vomit, diarrhoea duration <1 day vs. 1-3 days, stools 11-15 times vs. 16-20 times, stools 11-15 times vs. 21+ times	gshB	Glutathione synthetase
c01551	core genome snp	Vomit, diarrhoea duration <1 day vs. 1-3 days, stools 11-15 times vs. 16-20 times, stools 11-15 times vs. 21+ times	group_4402	PilZ domain-containing protein
c01530	core genome snp	Vomit, diarrhoea duration <1 day vs. 1-3 days, stools 11-15 times vs. 16-20 times, stools 11-15 times vs. 21+ times	group_4303	Exopolysaccharide biosynthesis protein, putative
c00255	core genome snp	Vomit, diarrhoea duration <1 day vs. 1-3 days, stools 11-15 times vs. 16-20 times, stools 11-15 times vs. 21+ times	clpS	ATP-dependent Clp protease adapter protein ClpS
c01526	core genome snp	Vomit, diarrhoea duration <1 day vs. 1-3 days, stools 11-15 times vs. 16-20 times, stools 11-15 times vs. 21+ times	group_4287	Magnesium transporter MgtE
c01553	core genome snp	Vomit, diarrhoea duration <1 day vs. 1-3 days, stools 11-15 times vs. 16-20 times, stools 11-15 times vs. 21+ times	group_4408	DnaJ-related protein
group_185	accessory gene	Vomit, diarrhoea duration <1 day vs. 1-3 days	group_132	IS91 family transposase
c00297	core genome snp	Vomit, Abdominal Pain, diarrhoea duration <1 day vs. 1-3 days, stools 11-15 times vs. 16-20 times, stools 11-15 times vs. 21+ times	dapF	Diaminopimelate epimerase
c00364	core genome snp	Vomit, Abdominal Pain, diarrhoea duration <1 day vs. 1-3 days, stools 11-15 times vs. 16-20 times, stools 11-15 times vs. 21+ times	fabV_1	Enoyl-[acyl-carrier-protein] reductase [NADH] 1
i00011	intergenic region snp	Vomit, Abdominal Pain, diarrhoea duration <1 day vs. 1-3 days, stools 11-15 times vs. 16-20 times, stools 11-15 times vs. 21+ times	Cluster 498 - group_1848 / folD		160bp	135bp
c00637	core genome snp	Abdominal Pain, moderate vs. severe dehydration, diarrhoea duration <1 day vs. 1-3 days, stools 11-15 times vs. 16-20 times, stools 11-15 times vs. 21+ times	group_1907	Transcription elongation factor GreA/GreB C-terminal domain-containing protein
c00007	core genome snp	Abdominal Pain, moderate vs. severe dehydration, diarrhoea duration <1 day vs. 1-3 days, stools 11-15 times vs. 16-20 times, stools 11-15 times vs. 21+ times	add	Adenosine deaminase
group_542	accessory gene	Vomit, Abdominal Pain, diarrhoea duration <1 day vs. 1-3 days, stools 11-15 times vs. 16-20 times, stools 11-15 times vs. 21+ times	group_542	Uncharacterized protein
group_59	accessory gene	Vomit, Abdominal Pain, diarrhoea duration <1 day vs. 1-3 days, stools 11-15 times vs. 16-20 times, stools 11-15 times vs. 21+ times	group_59	Phage replication protein Cri
c01562	core genome snp	Vomit, Abdominal Pain, moderate vs. severe dehydration, stools 11-15 times vs. 21+ times	group_4424	Toxin coregulated pilus biosynthesis protein B
group_4357	accessory gene	Vomit, diarrhoea duration <1 day vs. 1-3 days, stools 11-15 times vs. 16-20 times, stools 11-15 times vs. 21+ times	group_4357	RstA1 protein
group_196	accessory gene	Vomit, Abdominal Pain, diarrhoea duration <1 day vs. 1-3 days, stools 11-15 times vs. 21+ times	group_196	VOC domain-containing protein
group_182	accessory gene	Vomit, stools 11-15 times vs. 16-20 times, stools 11-15 times vs. 21+ times	group_182	DUF1289 domain-containing protein
group_4347	accessory gene	Vomit, Abdominal Pain, diarrhoea duration <1 day vs. 1-3 days, stools 11-15 times vs. 16-20 times, stools 11-15 times vs. 21+ times	group_4347	Cryptic phage CTXphi transcriptional repressor RstR
group_198	accessory gene	diarrhoea duration <1 day vs. 1-3 days	group_198	VOC domain-containing protein
group_190	accessory gene	Vomit, Abdominal Pain, moderate vs. severe dehydration, stools 11-15 times vs. 16-20 times, stools 11-15 times vs. 21+ times	group_190	VOC domain-containing protein
i00038	intergenic region snp	Abdominal Pain	Cluster 715 - add / tRNA-Asp(gtc)		202bp	38bp
group_29	accessory gene	Abdominal Pain, diarrhoea duration <1 day vs. 1-3 days, stools 11-15 times vs. 16-20 times, stools 11-15 times vs. 21+ times	group_29	RfbT-related protein
tufB_2	accessory gene	Vomit, Abdominal Pain, diarrhoea duration <1 day vs. 1-3 days, stools 11-15 times vs. 16-20 times, stools 11-15 times vs. 21+ times	tufB_2	Elongation factor Tu
i00037	intergenic region snp	Abdominal Pain	Cluster 715 - add / tRNA-Asp(gtc)		194bp	46bp
group_181	accessory gene	Vomit, Abdominal Pain, diarrhoea duration <1 day vs. 1-3 days, stools 11-15 times vs. 21+ times	group_181	DUF1289 domain-containing protein, Fe-S protein
i00036	intergenic region snp	Abdominal Pain	Cluster 715 - add / tRNA-Asp(gtc)		185bp	55bp
group_4810	accessory gene	Vomit, moderate vs. severe dehydration, diarrhoea duration <1 day vs. 1-3 days	group_4810	RstB1 protein
group_21	accessory gene	Vomit	group_21	GGDEF family protein
blc	accessory gene	Vomit, stools 11-15 times vs. 16-20 times, stools 11-15 times vs. 21+ times	blc	Outer membrane lipoprotein Blc
group_19	accessory gene	Abdominal Pain	group_19	Uncharacterized protein
c02345	core genome snp	Vomit, Abdominal Pain, moderate vs. severe dehydration, stools 11-15 times vs. 16-20 times	tufB	Elongation factor Tu-B
c02346	core genome snp	Vomit, Abdominal Pain, moderate vs. severe dehydration, stools 11-15 times vs. 16-20 times	tufB	Elongation factor Tu-B
group_180	accessory gene	Vomit	group_180	DUF1289 domain-containing protein, Fe-S protein
group_868	accessory gene	Vomit, Abdominal Pain, diarrhoea duration <1 day vs. 1-3 days, stools 11-15 times vs. 16-20 times, stools 11-15 times vs. 21+ times	group_868	Outer membrane lipoprotein Blc
c01911	core genome snp	Abdominal Pain, diarrhoea duration <1 day vs. 1-3 days, stools 11-15 times vs. 16-20 times, stools 11-15 times vs. 21+ times	lpoA	Penicillin-binding protein activator LpoA
c02379	core genome snp	moderate vs. severe dehydration, diarrhoea duration <1 day vs. 1-3 days	yjcS	Metallo-beta-lactamase domain-containing protein
group_63	accessory gene	diarrhoea duration <1 day vs. 1-3 days	group_63	Phage replication protein Cri
c02155	core genome snp	moderate vs. severe dehydration, diarrhoea duration <1 day vs. 1-3 days	phrB	Cryptochrome/photolyase family protein
group_46	accessory gene	diarrhoea duration <1 day vs. 1-3 days	group_46	Glycosyl hydrolase
group_1317	accessory gene	Vomit, diarrhoea duration <1 day vs. 1-3 days	group_1317	RstB1 protein
group_943	accessory gene	moderate vs. severe dehydration, diarrhoea duration <1 day vs. 1-3 days	group_943	Biphenyl-2,3-diol 1,2-dioxygenase III-related protein
group_61	accessory gene	Vomit, Abdominal Pain, moderate vs. severe dehydration	group_61	Phage replication protein Cri
group_197	accessory gene	Vomit, stools 11-15 times vs. 16-20 times, stools 11-15 times vs. 21+ times	group_197	VOC domain-containing protein
i00004	intergenic region snp	moderate vs. severe dehydration, diarrhoea duration <1 day vs. 1-3 days	Cluster 217 - ltxB / group_3693		250bp	172bp
c00362	core genome snp	moderate vs. severe dehydration, diarrhoea duration <1 day vs. 1-3 days	fabH1	Beta-ketoacyl-[acyl-carrier-protein] synthase III 1
c01234	core genome snp	moderate vs. severe dehydration, diarrhoea duration <1 day vs. 1-3 days	group_2848	ABC3 transporter permease protein domain-containing protein
group_174(yiaC)	accessory gene	Vomit, Abdominal Pain	group_174(yiaC)	N-acetyltransferase domain-containing protein
group_9	accessory gene	Vomit	group_9	Uncharacterized protein
group_170	accessory gene	Vomit	group_170	N-acetyltransferase domain-containing protein
group_172	accessory gene	Vomit, Abdominal Pain, stools 11-15 times vs. 16-20 times, stools 11-15 times vs. 21+ times	group_172	N-acetyltransferase domain-containing protein
c02348	core genome snp	Vomit, moderate vs. severe dehydration	tufB	Elongation factor Tu-B
c02349	core genome snp	Vomit, moderate vs. severe dehydration	tufB	Elongation factor Tu-B
c02350	core genome snp	Vomit, moderate vs. severe dehydration	tufB	Elongation factor Tu-B
group_618	accessory gene	diarrhoea duration <1 day vs. 1-3 days, stools 11-15 times vs. 16-20 times, stools 11-15 times vs. 21+ times	group_618	-
group_947	accessory gene	moderate vs. severe dehydration, stools 11-15 times vs. 21+ times	group_947	Uncharacterized protein
group_3786	accessory gene	Vomit, Abdominal Pain, diarrhoea duration <1 day vs. 1-3 days	group_3786	Uncharacterized protein
c02236	core genome snp	diarrhoea duration <1 day vs. 1-3 days	tadA_2	Deoxycytidylate deaminase-related protein
i00041	intergenic region snp	diarrhoea duration <1 day vs. 1-3 days	Cluster 1495 - trmO / rpmE2		19bp	114bp
c02132	core genome snp	diarrhoea duration <1 day vs. 1-3 days	pepN	Aminopeptidase N
c00762	core genome snp	diarrhoea duration <1 day vs. 1-3 days	group_1972	DNA-binding protein inhibitor Id-2-related protein
c01574	core genome snp	diarrhoea duration <1 day vs. 1-3 days	group_4460	Lipoprotein
c02117	core genome snp	diarrhoea duration <1 day vs. 1-3 days	padC	Probable phenolic acid decarboxylase
c00293	core genome snp	diarrhoea duration <1 day vs. 1-3 days	cysG_2	uroporphyrinogen-III C-methyltransferase
group_194	accessory gene	moderate vs. severe dehydration, diarrhoea duration <1 day vs. 1-3 days, stools 11-15 times vs. 21+ times	group_194	VOC domain-containing protein
group_3784	accessory gene	Vomit	group_3784	Uncharacterized protein
yiaC	accessory gene	Abdominal Pain	yiaC	N-acetyltransferase domain-containing protein
group_583	accessory gene	Abdominal Pain	group_583	DNA polymerase III, epsilon subunit, putative
group_948	accessory gene	Vomit, moderate vs. severe dehydration, stools 11-15 times vs. 16-20 times, stools 11-15 times vs. 21+ times	group_948	Uncharacterized protein
group_946	accessory gene	Vomit, moderate vs. severe dehydration	group_946	Uncharacterized protein
pckA	accessory gene	Abdominal Pain	pckA	Phosphoenolpyruvate carboxykinase (ATP)
group_4087	accessory gene	stools 11-15 times vs. 21+ times	group_4087	Biphenyl-2,3-diol 1,2-dioxygenase III-related protein
group_4201	accessory gene	Vomit, Abdominal Pain, moderate vs. severe dehydration, diarrhoea duration <1 day vs. 1-3 days	group_4201	Uncharacterized protein
group_3789	accessory gene	stools 11-15 times vs. 16-20 times	group_3789	Uncharacterized protein
group_4088	accessory gene	Vomit, Abdominal Pain	group_4088	Biphenyl-2,3-diol 1,2-dioxygenase III-related protein
luxR_2	accessory gene	Vomit, moderate vs. severe dehydration, diarrhoea duration <1 day vs. 1-3 days	luxR_2	LuxR family transcriptional regulator
group_48	accessory gene	diarrhoea duration <1 day vs. 1-3 days	group_48	PilZ domain-containing protein
hcpA_1	accessory gene	stools 11-15 times vs. 16-20 times	hcpA_1	Hcp protein
rpoS	accessory gene	Vomit	rpoS	RNA polymerase sigma factor RpoS
dcuA	accessory gene	Abdominal Pain	dcuA	C4-dicarboxylate transporter
group_594	accessory gene	stools 11-15 times vs. 16-20 times, stools 11-15 times vs. 21+ times	group_594	-
group_4811	accessory gene	stools 11-15 times vs. 16-20 times, stools 11-15 times vs. 21+ times	group_4811	RstB2 protein
group_189	accessory gene	moderate vs. severe dehydration, stools 11-15 times vs. 16-20 times, stools 11-15 times vs. 21+ times	group_189	Transposase zinc-binding domain-containing protein
c02347	core genome snp	Vomit, moderate vs. severe dehydration, stools 11-15 times vs. 16-20 times, stools 11-15 times vs. 21+ times	tufB	Elongation factor Tu-B
group_3783	accessory gene	Vomit, moderate vs. severe dehydration	group_3783	Uncharacterized protein
group_187	accessory gene	Vomit, Abdominal Pain, moderate vs. severe dehydration	group_187	Transposase zinc-binding domain-containing protein
group_862	accessory gene	Vomit, moderate vs. severe dehydration	group_862	-
luxR	accessory gene	diarrhoea duration <1 day vs. 1-3 days	luxR	LuxR family transcriptional regulator
oppA	accessory gene	Abdominal Pain	oppA	Oligopeptide ABC transporter, periplasmic oligopeptide-binding protein
group_54	accessory gene	Vomit, moderate vs. severe dehydration, stools 11-15 times vs. 21+ times	group_54	Acetyltransferase, putative
group_56	accessory gene	Vomit, diarrhoea duration <1 day vs. 1-3 days	group_56	Acetyltransferase, putative
