# Supplementary material for: Signature genomic traits of the core and accessory genome of Vibrio Cholerae O1 drive lineage transmission and disease severity
Source: Research Square preprint supplement (doi:10.21203/rs.3.rs-4184222/v1), 2024-04-05
Supplement: Supplementary file 10 [file f532b811e854c67d059edd14.xlsx]

## Sheet: TableS3
Accessory Features								Core SNPs								Intergenic SNPs
Feature Type	Feature ID	Feature	Presence BD-1.2 (% of samples with feature)	Presence BD-2 (% of samples with feature)	Fisher Exact p-value			Feature Type	Feature ID	Feature	Presence BD-1.2 (% of samples with feature)	Presence BD-2 (% of samples with feature)	Fisher Exact p-value			Feature Type	Feature ID	Feature	Presence BD-1.2 (% of samples with feature)	Presence BD-2 (% of samples with feature)	Fisher Exact p-value
Accessory	group_256	group_256	0	100	7.96977e-36			Core SNP	c02382	znuC-synonymous	100	0	7.96977e-36			Intergenic SNP	i00110	Cluster_61- between umuD and dinG_2	0	100	7.96977e-36
Accessory	group_749	group_749	100	0	7.96977e-36			Core SNP	c00258	cobB-nonsynonymous (L50P)	100	0	7.96977e-36			Intergenic SNP	i00111	Cluster_61- between umuD and dinG_2	0	100	7.96977e-36
Accessory	endA	endA	100	0	7.96977e-36			Core SNP	c00254	clcA-nonsynonymous (G104E)	100	0	7.96977e-36			Intergenic SNP	i00112	Cluster_61- between xerC_1 and dhfrI	0	100	7.96977e-36
Accessory	group_747	group_747	100	0	7.96977e-36			Core SNP	c02187	putA-nonsynonymous (V600A)	100	0	7.96977e-36			Intergenic SNP	i00113	Cluster_61- between group_3567 and group_259	0	100	7.96977e-36
Accessory	group_746	group_746	100	0	7.96977e-36			Core SNP	c02192	recD-nonsynonymous (Y680C)	100	0	7.96977e-36			Intergenic SNP	i00114	Cluster_61- between group_3567 and group_259	0	100	7.96977e-36
Accessory	group_745	group_745	100	0	7.96977e-36			Core SNP	c02197	ribE-synonymous	100	0	7.96977e-36			Intergenic SNP	i00115	Cluster_2616- between group_2628 and wcaJ	0	100	7.96977e-36
Accessory	group_744	group_744	100	0	7.96977e-36			Core SNP	c02218	rssB_3-nonsynonymous (L79F)	100	0	7.96977e-36			Intergenic SNP	i00116	Cluster_2262- between group_2628 and wcaJ	0	100	7.96977e-36
Accessory	group_743	group_743	100	0	7.96977e-36			Core SNP	c02219	rstA-synonymous	100	0	7.96977e-36			Intergenic SNP	i00163	Cluster_890- between group_3825 and group_2161	0	100	7.96977e-36
Accessory	group_742	group_742	100	0	7.96977e-36			Core SNP	c02223	rtxA-synonymous	100	0	7.96977e-36			Intergenic SNP	i00117	Cluster_2262- between group_2628 and wcaJ	0	100	7.96977e-36
Accessory	group_741	group_741	100	0	7.96977e-36			Core SNP	c02231	skp-nonsynonymous (L46W)	100	0	7.96977e-36			Intergenic SNP	i00119	Cluster_528- between group_2628 and wcaJ	0	100	7.96977e-36
Accessory	group_739	group_739	100	0	7.96977e-36			Core SNP	c02090	nagA_1-synonymous	100	0	7.96977e-36			Intergenic SNP	i00120	Cluster_528- between group_2628 and wcaJ	0	100	7.96977e-36
Accessory	group_738	group_738	100	0	7.96977e-36			Core SNP	c02235	suhB-nonsynonymous (G217E)	100	0	7.96977e-36			Intergenic SNP	i00121	Cluster_528- between group_2628 and wcaJ	0	100	7.96977e-36
Accessory	group_737	group_737	100	0	7.96977e-36			Core SNP	c02344	trmL_1-nonsynonymous (S6T)	100	0	7.96977e-36			Intergenic SNP	i00122	Cluster_528- between group_2628 and wcaJ	0	100	7.96977e-36
Accessory	group_736	group_736	100	0	7.96977e-36			Core SNP	c01509	group_3644-synonymous	100	0	7.96977e-36			Intergenic SNP	i00123	Cluster_528- between group_2628 and wcaJ	0	100	7.96977e-36
Accessory	group_735	group_735	100	0	7.96977e-36			Core SNP	c01510	group_375-nonsynonymous (A181E)	100	0	7.96977e-36			Intergenic SNP	i00124	Cluster_528- between group_2628 and wcaJ	0	100	7.96977e-36
Accessory	group_734	group_734	100	0	7.96977e-36			Core SNP	c02351	tyrA-synonymous	100	0	7.96977e-36			Intergenic SNP	i00118	Cluster_528- between group_2628 and wcaJ	0	100	7.96977e-36
Accessory	adh	adh	100	0	7.96977e-36			Core SNP	c02352	tyrS_1-nonsynonymous (A393T)	100	0	7.96977e-36			Intergenic SNP	i00125	Cluster_528- between group_2628 and wcaJ	0	100	7.96977e-36
Accessory	group_732	group_732	100	0	7.96977e-36			Core SNP	c01511	group_3798-synonymous	100	0	7.96977e-36			Intergenic SNP	i00109	Cluster_61- between umuD and dinG_2	0	100	7.96977e-36
Accessory	group_750	group_750	100	0	7.96977e-36			Core SNP	c01513	group_3967-synonymous	100	0	7.96977e-36			Intergenic SNP	i00107	Cluster_61- between umuD and dinG_2	0	100	7.96977e-36
Accessory	group_731	group_731	100	0	7.96977e-36			Core SNP	c01515	group_4262-nonsynonymous (S161I)	100	0	7.96977e-36			Intergenic SNP	i00169	Cluster_2038- between group_3825 and group_2161	0	100	7.96977e-36
Accessory	group_751	group_751	100	0	7.96977e-36			Core SNP	c01517	group_4266-nonsynonymous (A150T)	100	0	7.96977e-36			Intergenic SNP	i00168	Cluster_2038- between group_3825 and group_2161	0	100	7.96977e-36
Accessory	group_753	group_753	100	0	7.96977e-36			Core SNP	c02237	tamA-nonsynonymous (I266T)	100	0	7.96977e-36			Intergenic SNP	i00167	Cluster_2038- between group_3825 and group_2161	0	100	7.96977e-36
Accessory	group_91	group_91	0	100	7.96977e-36			Core SNP	c02358	valS-nonsynonymous (R599H)	100	0	7.96977e-36			Intergenic SNP	i00166	Cluster_2038- between group_3825 and group_2161	0	100	7.96977e-36
Accessory	group_72	group_72	0	100	7.96977e-36			Core SNP	c02152	phhA-nonsynonymous (L19Q)	100	0	7.96977e-36			Intergenic SNP	i00165	Cluster_2038- between group_3825 and group_2161	0	100	7.96977e-36
Accessory	group_42	group_42	0	100	7.96977e-36			Core SNP	c00291	cydB_2-synonymous	100	0	7.96977e-36			Intergenic SNP	i00164	Cluster_2038- between group_3825 and group_2161	0	100	7.96977e-36
Accessory	group_378	group_378	0	100	7.96977e-36			Core SNP	c01164	group_225-nonsynonymous (V140K)	100	0	7.96977e-36			Intergenic SNP	i00108	Cluster_61- between umuD and dinG_2	0	100	7.96977e-36
Accessory	aer_3	aer_3	0	100	7.96977e-36			Core SNP	c01165	group_225-synonymous	100	0	7.96977e-36			Intergenic SNP	i00099	Cluster_2057- between group_4072 and yiaC	0	100	7.96977e-36
Accessory	group_333	group_333	0	100	7.96977e-36			Core SNP	c01198	group_2293-synonymous	100	0	7.96977e-36			Intergenic SNP	i00101	Cluster_2057- between group_4072 and yiaC	0	100	7.96977e-36
Accessory	group_332	group_332	0	100	7.96977e-36			Core SNP	c01208	group_2369-synonymous	100	0	7.96977e-36			Intergenic SNP	i00102	Cluster_2057- between group_4072 and yiaC	0	100	7.96977e-36
Accessory	group_331	group_331	0	100	7.96977e-36			Core SNP	c00376	glsA2-synonymous	100	0	7.96977e-36			Intergenic SNP	i00103	Cluster_61- between umuD and dinG_2	0	100	7.96977e-36
Accessory	group_330	group_330	0	100	7.96977e-36			Core SNP	c01209	group_2488-synonymous	100	0	7.96977e-36			Intergenic SNP	i00104	Cluster_61- between umuD and dinG_2	0	100	7.96977e-36
Accessory	group_329	group_329	0	100	7.96977e-36			Core SNP	c01212	group_2593-synonymous	100	0	7.96977e-36			Intergenic SNP	i00105	Cluster_61- between umuD and dinG_2	0	100	7.96977e-36
Accessory	group_328	group_328	0	100	7.96977e-36			Core SNP	c00371	glmM-nonsynonymous (L196R)	100	0	7.96977e-36			Intergenic SNP	i00106	Cluster_61- between umuD and dinG_2	0	100	7.96977e-36
Accessory	group_327	group_327	0	100	7.96977e-36			Core SNP	c00369	ftsY_2-synonymous	100	0	7.96977e-36			Intergenic SNP	i00100	Cluster_2057- between group_4072 and yiaC	0	100	7.96977e-36
Accessory	mepM_3	mepM_3	0	100	7.96977e-36			Core SNP	c00290	ctxB-nonsynonymous (H20N)	100	0	7.96977e-36			Intergenic SNP	i00170	Cluster_2038- between group_3825 and group_2161	0	100	7.96977e-36
Accessory	group_325	group_325	0	100	7.96977e-36			Core SNP	c00368	ftsX-synonymous	100	0	7.96977e-36			Intergenic SNP	i00126	Cluster_2124- between bepE_1 and group_150	0	100	7.96977e-36
Accessory	group_321	group_321	0	100	7.96977e-36			Core SNP	c00365	fadJ-synonymous	100	0	7.96977e-36			Intergenic SNP	i00128	Cluster_1092- between gltB_1 and group_3982	0	100	7.96977e-36
Accessory	group_100	group_100	0	100	7.96977e-36			Core SNP	c00355	dsbD-nonsynonymous (T583I)	100	0	7.96977e-36			Intergenic SNP	i00147	Cluster_2339- between appC and group_2044	0	100	7.96977e-36
Accessory	group_754	group_754	100	0	7.96977e-36			Core SNP	c00340	dltA_1-nonsynonymous (F1049L)	100	0	7.96977e-36			Intergenic SNP	i00148	Cluster_326- between metR and metE	0	100	7.96977e-36
Accessory	group_752	group_752	100	0	7.96977e-36			Core SNP	c02129	pctB_4-nonsynonymous (W249L)	100	0	7.96977e-36			Intergenic SNP	i00149	Cluster_326- between metR and metE	0	100	7.96977e-36
Accessory	group_70	group_70	100	0	7.96977e-36			Core SNP	c02116	oppD_2-synonymous	100	0	7.96977e-36			Intergenic SNP	i00150	Cluster_326- between metR and metE	0	100	7.96977e-36
Accessory	lon_3	lon_3	100	0	7.96977e-36			Core SNP	c00307	dctD_2-synonymous	100	0	7.96977e-36			Intergenic SNP	i00151	Cluster_326- between metR and metE	0	100	7.96977e-36
Accessory	group_122	group_122	100	0	7.96977e-36			Core SNP	c02108	nudF_2-nonsynonymous (C109R)	100	0	7.96977e-36			Intergenic SNP	i00152	Cluster_326- between group_291 and group_200	0	100	7.96977e-36
Accessory	group_310	group_310	0	97.7778	6.77431e-34			Core SNP	c00296	czcA-synonymous	100	0	7.96977e-36			Intergenic SNP	i00146	Cluster_2339- between appC and group_2044	0	100	7.96977e-36
Accessory	group_309	group_309	0	97.7778	6.77431e-34			Core SNP	c00292	cysG_1-nonsynonymous (A38V)	100	0	7.96977e-36			Intergenic SNP	i00153	Cluster_326- between metR and metE	0	100	7.96977e-36
Accessory	group_308	group_308	0	97.7778	6.77431e-34			Core SNP	c00366	ftsI-nonsynonymous (R491H)	100	0	7.96977e-36			Intergenic SNP	i00155	Cluster_326- between metR and metE	0	100	7.96977e-36
Accessory	group_313	group_313	0	97.7778	6.77431e-34			Core SNP	c01519	group_4277-nonsynonymous (N98D)	100	0	7.96977e-36			Intergenic SNP	i00156	Cluster_890- between group_3825 and group_2161	0	100	7.96977e-36
Accessory	group_306	group_306	0	97.7778	6.77431e-34			Core SNP	c02191	recD-nonsynonymous (Y680C)	100	0	7.96977e-36			Intergenic SNP	i00157	Cluster_890- between group_3825 and group_2161	0	100	7.96977e-36
Accessory	group_305	group_305	0	97.7778	6.77431e-34			Core SNP	c01533	group_4305-nonsynonymous (Q272H)	100	0	7.96977e-36			Intergenic SNP	i00158	Cluster_890- between group_3825 and group_2161	0	100	7.96977e-36
Accessory	group_304	group_304	0	97.7778	6.77431e-34			Core SNP	c00025	bluF-nonsynonymous (K149N)	100	0	7.96977e-36			Intergenic SNP	i00159	Cluster_890- between group_3825 and group_2161	0	100	7.96977e-36
Accessory	group_303	group_303	0	97.7778	6.77431e-34			Core SNP	c00028	bluF-nonsynonymous (S150R)	100	0	7.96977e-36			Intergenic SNP	i00160	Cluster_890- between group_3825 and group_2161	0	100	7.96977e-36
Accessory	group_302	group_302	0	97.7778	6.77431e-34			Core SNP	c00032	bluF-nonsynonymous (L151H)	100	0	7.96977e-36			Intergenic SNP	i00154	Cluster_326- between metR and metE	0	100	7.96977e-36
Accessory	group_293	group_293	0	97.7778	6.77431e-34			Core SNP	c00031	bluF-nonsynonymous (G152S)	100	0	7.96977e-36			Intergenic SNP	i00127	Cluster_2124- between bepE_1 and group_150	0	100	7.96977e-36
Accessory	group_292	group_292	0	97.7778	6.77431e-34			Core SNP	c00029	bluF-nonsynonymous (F153A)	100	0	7.96977e-36			Intergenic SNP	i00145	Cluster_2153- between bepE_1 and group_150	0	100	7.96977e-36
Accessory	group_291	group_291	0	97.7778	6.77431e-34			Core SNP	c00024	bluF-nonsynonymous (Q154A)	100	0	7.96977e-36			Intergenic SNP	i00143	Cluster_2187- between gltB_1 and group_3982	0	100	7.96977e-36
Accessory	group_110	group_110	0	97.7778	6.77431e-34			Core SNP	c00030	bluF-nonsynonymous (T155N)	100	0	7.96977e-36			Intergenic SNP	i00129	Cluster_1092- between gltB_1 and group_3982	0	100	7.96977e-36
Accessory	hlyA_1	hlyA_1	0	97.7778	6.77431e-34			Core SNP	c00023	bluF-nonsynonymous (A156S)	100	0	7.96977e-36			Intergenic SNP	i00130	Cluster_1092- between gltB_1 and group_3982	0	100	7.96977e-36
Accessory	group_119	group_119	0	97.7778	6.77431e-34			Core SNP	c00022	bluF-nonsynonymous (I157R)	100	0	7.96977e-36			Intergenic SNP	i00131	Cluster_1092- between gltB_1 and group_3982	0	100	7.96977e-36
Accessory	mrr	mrr	0	97.7778	6.77431e-34			Core SNP	c00021	bluF-nonsynonymous (D158I)	100	0	7.96977e-36			Intergenic SNP	i00132	Cluster_1092- between gltB_1 and group_3982	0	100	7.96977e-36
Accessory	mcrC	mcrC	0	97.7778	6.77431e-34			Core SNP	c00019	bhuA-synonymous	100	0	7.96977e-36			Intergenic SNP	i00133	Cluster_1092- between gltB_1 and group_3982	0	100	7.96977e-36
Accessory	group_283	group_283	0	97.7778	6.77431e-34			Core SNP	c01604	gyrA-nonsynonymous (E660D)	100	0	7.96977e-36			Intergenic SNP	i00134	Cluster_1092- between gltB_1 and group_3982	0	100	7.96977e-36
Accessory	tetR	tetR	0	97.7778	6.77431e-34			Core SNP	c00020	bluF-nonsynonymous (-237Y)	100	0	7.96977e-36			Intergenic SNP	i00144	Cluster_2153- between bepE_1 and group_150	0	100	7.96977e-36
Accessory	group_316	group_316	0	97.7778	6.77431e-34			Core SNP	c01901	kbl-synonymous	100	0	7.96977e-36			Intergenic SNP	i00135	Cluster_1092- between gltB_1 and group_3982	0	100	7.96977e-36
Accessory	group_317	group_317	0	97.7778	6.77431e-34			Core SNP	c01907	licH-nonsynonymous (A56T)	100	0	7.96977e-36			Intergenic SNP	i00137	Cluster_1092- between gltB_1 and group_3982	0	100	7.96977e-36
Accessory	group_318	group_318	0	97.7778	6.77431e-34			Core SNP	c01919	mak-nonsynonymous (G116R)	100	0	7.96977e-36			Intergenic SNP	i00138	Cluster_1092- between gltB_1 and group_3982	0	100	7.96977e-36
Accessory	tetA	tetA	0	97.7778	6.77431e-34			Core SNP	c01926	manP_2-synonymous	100	0	7.96977e-36			Intergenic SNP	i00139	Cluster_1092- between gltB_1 and group_3982	0	100	7.96977e-36
Accessory	group_289	group_289	0	97.7778	6.77431e-34			Core SNP	c01955	murI-nonsynonymous (S137A)	100	0	7.96977e-36			Intergenic SNP	i00140	Cluster_1092- between gltB_1 and group_3982	0	100	7.96977e-36
Accessory	group_315	group_315	0	97.7778	6.77431e-34			Core SNP	c01957	mutL-nonsynonymous (C350R)	100	0	7.96977e-36			Intergenic SNP	i00141	Cluster_1092- between gltB_1 and group_3982	0	100	7.96977e-36
Accessory	group_314	group_314	0	97.7778	6.77431e-34			Core SNP	c01610	hrpB-nonsynonymous (V782A)	100	0	7.96977e-36			Intergenic SNP	i00142	Cluster_1092- between gltB_1 and group_3982	0	100	7.96977e-36
Accessory	hdfR_4	hdfR_4	96.4286	0	1.37845e-31			Core SNP	c00011	argG-nonsynonymous (A283T)	100	0	7.96977e-36			Intergenic SNP	i00136	Cluster_1092- between gltB_1 and group_3982	0	100	7.96977e-36
Accessory	group_759	group_759	96.4286	0	1.37845e-31			Core SNP	c00033	bluF-synonymous	100	0	7.96977e-36			Intergenic SNP	i00161	Cluster_890- between group_3825 and group_2161	0	100	7.96977e-36
Accessory	bcr_2	bcr_2	96.4286	0	1.37845e-31			Core SNP	c01570	group_4448-nonsynonymous (S48N)	100	0	7.96977e-36			Intergenic SNP	i00162	Cluster_890- between group_3825 and group_2161	0	100	7.96977e-36
Accessory	group_95	group_95	4.7619	100	1.6886e-30			Core SNP	c01579	group_4471-nonsynonymous (E7D)	100	0	7.96977e-36			Intergenic SNP	i00186	Cluster_2092- between group_120 and group_318	0	100	7.96977e-36
Accessory	group_22	group_22	5.95238	100	1.6886e-29			Core SNP	c00010	appC-nonsynonymous (A226T)	100	0	7.96977e-36			Intergenic SNP	i00197	Cluster_421- between group_3319 and group_4446	0	100	7.96977e-36
Accessory	group_238	group_238	100	13.3333	4.9621e-27			Core SNP	c00026	bluF-synonymous	100	0	7.96977e-36			Intergenic SNP	i00196	Cluster_421- between group_3319 and group_4446	0	100	7.96977e-36
Accessory	group_389	group_389	100	13.3333	4.9621e-27			Core SNP	c00027	bluF-nonsynonymous (-252V)	100	0	7.96977e-36			Intergenic SNP	i00195	Cluster_421- between group_3319 and group_4446	0	100	7.96977e-36
Accessory	group_390	group_390	100	13.3333	4.9621e-27			Core SNP	c01521	group_4278-nonsynonymous (A175V)	100	0	7.96977e-36			Intergenic SNP	i00194	Cluster_421- between group_3319 and group_4446	0	100	7.96977e-36
Accessory	group_387	group_387	100	13.3333	4.9621e-27			Core SNP	c01565	group_4431-nonsynonymous (H34N)	100	0	7.96977e-36			Intergenic SNP	i00193	Cluster_421- between group_3319 and group_4446	0	100	7.96977e-36
Accessory	group_388	group_388	100	13.3333	4.9621e-27			Core SNP	c02373	ycbB-nonsynonymous (S326P)	100	0	7.96977e-36			Intergenic SNP	i00192	Cluster_421- between group_3319 and group_4446	0	100	7.96977e-36
Accessory	group_239	group_239	100	17.7778	7.41834e-25			Core SNP	c01549	group_4391-nonsynonymous (M103V)	100	0	7.96977e-36			Intergenic SNP	i00191	Cluster_421- between group_3319 and group_4446	0	100	7.96977e-36
Accessory	group_324	group_324	94.0476	13.3333	3.8211e-21			Core SNP	c01548	group_4387-nonsynonymous (A241S)	100	0	7.96977e-36			Intergenic SNP	i00190	Cluster_2092- between group_120 and group_318	0	100	7.96977e-36
Accessory	group_232	group_232	0	73.3333	4.97847e-21			Core SNP	c01568	group_4447-synonymous	100	0	7.96977e-36			Intergenic SNP	i00189	Cluster_2092- between group_120 and group_318	0	100	7.96977e-36
Accessory	group_341	group_341	0	68.8889	2.60029e-19			Core SNP	c01560	group_4422-nonsynonymous (V277G)	100	0	7.96977e-36			Intergenic SNP	i00039	Cluster_820- between and viaA	0	100	7.96977e-36
Accessory	group_342	group_342	0	68.8889	2.60029e-19			Core SNP	c01564	group_4430-nonsynonymous (T354I)	100	0	7.96977e-36			Intergenic SNP	i00040	Cluster_748- between metN and gmhB	0	100	7.96977e-36
Accessory	group_362	group_362	0	68.8889	2.60029e-19			Core SNP	c01547	group_4386-nonsynonymous (A121S)	100	0	7.96977e-36			Intergenic SNP	i00181	Cluster_1925- between group_278 and group_279	0	100	7.96977e-36
Accessory	group_361	group_361	0	68.8889	2.60029e-19			Core SNP	c01538	group_4348-nonsynonymous (D201G)	100	0	7.96977e-36			Intergenic SNP	i00188	Cluster_2092- between group_120 and group_318	0	100	7.96977e-36
Accessory	group_360	group_360	0	68.8889	2.60029e-19			Core SNP	c01544	group_4363-nonsynonymous (Y108D)	100	0	7.96977e-36			Intergenic SNP	i00182	Cluster_1925- between group_278 and group_279	0	100	7.96977e-36
Accessory	group_359	group_359	0	68.8889	2.60029e-19			Core SNP	c01543	group_4362-nonsynonymous (S191P)	100	0	7.96977e-36			Intergenic SNP	i00183	Cluster_1925- between ykgO and abgT_2	0	100	7.96977e-36
Accessory	group_358	group_358	0	68.8889	2.60029e-19			Core SNP	c01539	group_4353-nonsynonymous (C45Y)	100	0	7.96977e-36			Intergenic SNP	i00184	Cluster_1925- between ykgO and abgT_2	0	100	7.96977e-36
Accessory	group_357	group_357	0	68.8889	2.60029e-19			Core SNP	c00012	argT-synonymous	98.8095	0	3.6661e-34			Intergenic SNP	i00185	Cluster_2466- between group_120 and group_318	0	100	7.96977e-36
Accessory	group_356	group_356	0	68.8889	2.60029e-19			Core SNP	c02239	thiI-synonymous	98.8095	0	3.6661e-34			Intergenic SNP	i00046	Cluster_63- between group_2205 and gntR_1	0	100	7.96977e-36
Accessory	group_355	group_355	0	68.8889	2.60029e-19			Core SNP	c01605	hdfR_1-nonsynonymous (A174V)	98.8095	0	3.6661e-34			Intergenic SNP	i00187	Cluster_2092- between group_120 and group_318	0	100	7.96977e-36
Accessory	group_354	group_354	0	68.8889	2.60029e-19			Core SNP	c02238	thiG-nonsynonymous (A191V)	98.8095	0	3.6661e-34			Intergenic SNP	i00028	Cluster_1089- between trmJ and suhB	0	100	7.96977e-36
Accessory	group_352	group_352	0	68.8889	2.60029e-19			Core SNP	c02374	ycjX-nonsynonymous (A447V)	98.8095	0	3.6661e-34			Intergenic SNP	i00044	Cluster_2317- between group_1944 and glpT	0	100	7.96977e-36
Accessory	group_351	group_351	0	68.8889	2.60029e-19			Core SNP	c02353	ubiA-nonsynonymous (T199I)	98.8095	0	3.6661e-34			Intergenic SNP	i00198	Cluster_421- between group_3319 and group_4446	0	100	7.96977e-36
Accessory	group_349	group_349	0	68.8889	2.60029e-19			Core SNP	c02381	zntB-synonymous	98.8095	0	3.6661e-34			Intergenic SNP	i00200	Cluster_421- between group_3319 and group_4446	0	100	7.96977e-36
Accessory	group_348	group_348	0	68.8889	2.60029e-19			Core SNP	c01576	group_4464-nonsynonymous (A1103T)	98.8095	0	3.6661e-34			Intergenic SNP	i00003	Cluster_606- between thrS and group_1615	0	100	7.96977e-36
Accessory	group_347	group_347	0	68.8889	2.60029e-19			Core SNP	c01019	group_203-synonymous	100	2.22222	6.77431e-34			Intergenic SNP	i00213	Cluster_421- between umuC_2 and group_265	0	100	7.96977e-36
Accessory	group_343	group_343	0	68.8889	2.60029e-19			Core SNP	c00998	group_202-synonymous	100	2.22222	6.77431e-34			Intergenic SNP	i00212	Cluster_421- between umuC_2 and group_265	0	100	7.96977e-36
Accessory	group_346	group_346	0	68.8889	2.60029e-19			Core SNP	c01018	group_203-synonymous	100	2.22222	6.77431e-34			Intergenic SNP	i00211	Cluster_421- between umuC_2 and group_265	0	100	7.96977e-36
Accessory	group_339	group_339	0	68.8889	2.60029e-19			Core SNP	c01013	group_203-nonsynonymous (T7S)	100	2.22222	6.77431e-34			Intergenic SNP	i00009	Cluster_290- between group_4050 and leuA	0	100	7.96977e-36
Accessory	group_344	group_344	0	68.8889	2.60029e-19			Core SNP	c01000	group_202-nonsynonymous (K98N)	100	2.22222	6.77431e-34			Intergenic SNP	i00210	Cluster_421- between umuC_2 and group_265	0	100	7.96977e-36
Accessory	group_345	group_345	0	68.8889	2.60029e-19			Core SNP	c01015	group_203-nonsynonymous (Q11L)	100	2.22222	6.77431e-34			Intergenic SNP	i00209	Cluster_421- between umuC_2 and group_265	0	100	7.96977e-36
Accessory	group_221	group_221	0	68.8889	2.60029e-19			Core SNP	c01012	group_202-synonymous	100	2.22222	6.77431e-34			Intergenic SNP	i00208	Cluster_421- between group_262 and group_263	0	100	7.96977e-36
Accessory	group_353	group_353	0	68.8889	2.60029e-19			Core SNP	c01011	group_202-synonymous	100	2.22222	6.77431e-34			Intergenic SNP	i00014	Cluster_1346- between group_167 and argF	0	100	7.96977e-36
Accessory	group_340	group_340	0	68.8889	2.60029e-19			Core SNP	c01010	group_202-synonymous	100	2.22222	6.77431e-34			Intergenic SNP	i00199	Cluster_421- between group_3319 and group_4446	0	100	7.96977e-36
Accessory	group_350	group_350	0	68.8889	2.60029e-19			Core SNP	c01009	group_202-synonymous	100	2.22222	6.77431e-34			Intergenic SNP	i00015	Cluster_122- between group_3150 and group_4339	0	100	7.96977e-36
Accessory	group_131	group_131	51.1905	2.22222	1.26656e-09			Core SNP	c01008	group_202-nonsynonymous (E127Q)	100	2.22222	6.77431e-34			Intergenic SNP	i00206	Cluster_421- between group_262 and group_263	0	100	7.96977e-36
Accessory	group_237	group_237	47.619	95.5556	7.96922e-09			Core SNP	c01007	group_202-nonsynonymous (T126S)	100	2.22222	6.77431e-34			Intergenic SNP	i00205	Cluster_421- between group_262 and group_263	0	100	7.96977e-36
Accessory	group_322	group_322	3.57143	44.4444	1.87972e-08			Core SNP	c01006	group_202-nonsynonymous (A116E)	100	2.22222	6.77431e-34			Intergenic SNP	i00204	Cluster_421- between group_3319 and group_4446	0	100	7.96977e-36
Accessory	group_132	group_132	48.8095	4.44444	5.69872e-08			Core SNP	c01005	group_202-nonsynonymous (N113T)	100	2.22222	6.77431e-34			Intergenic SNP	i00203	Cluster_421- between group_3319 and group_4446	0	100	7.96977e-36
Accessory	group_36	group_36	36.9048	0	1.75684e-07			Core SNP	c01016	group_203-synonymous	100	2.22222	6.77431e-34			Intergenic SNP	i00202	Cluster_421- between group_3319 and group_4446	0	100	7.96977e-36
Accessory	group_135	group_135	40.4762	82.2222	5.78072e-06			Core SNP	c01004	group_202-nonsynonymous (N113T)	100	2.22222	6.77431e-34			Intergenic SNP	i00201	Cluster_421- between group_3319 and group_4446	0	100	7.96977e-36
Accessory	group_4348	group_4348	13.0952	51.1111	6.10669e-06			Core SNP	c01003	group_202-nonsynonymous (N113T)	100	2.22222	6.77431e-34			Intergenic SNP	i00207	Cluster_421- between group_262 and group_263	0	100	7.96977e-36
Accessory	group_224	group_224	77.381	37.7778	1.65025e-05			Core SNP	c01002	group_202-synonymous	100	2.22222	6.77431e-34			Intergenic SNP	i00043	Cluster_1406- between cpdB and group_3683	0	100	7.96977e-36
Accessory	group_4336	group_4336	16.6667	51.1111	7.44347e-05			Core SNP	c01014	group_203-synonymous	100	2.22222	6.77431e-34			Intergenic SNP	i00020	Cluster_28- between rraB and arcA_2	1.19048	100	3.6661e-34
Accessory	group_338	group_338	100	82.2222	0.000141418			Core SNP	c01017	group_203-synonymous	100	2.22222	6.77431e-34			Intergenic SNP	i00017	Cluster_257- between aruC and trpG_2	0	93.3333	8.44756e-31
Accessory	group_337	group_337	100	82.2222	0.000141418			Core SNP	c00999	group_202-synonymous	100	2.22222	6.77431e-34			Intergenic SNP	i00031	Cluster_601- between ackA_2 and group_3979	0	93.3333	8.44756e-31
Accessory	inhA	inhA	100	82.2222	0.000141418			Core SNP	c01001	group_202-nonsynonymous (M105L)	100	2.22222	6.77431e-34			Intergenic SNP	i00006	Cluster_953- between fieF and group_3403	0	93.3333	8.44756e-31
Accessory	group_20	group_20	52.381	84.4444	0.000266414			Core SNP	c00992	group_201-synonymous	100	2.22222	6.77431e-34			Intergenic SNP	i00073	Cluster_9- between brnQ and yfiC_1	0	68.8889	2.60029e-19
Accessory	tufB_2	tufB_2	15.4762	46.6667	0.000270908			Core SNP	c00996	group_202-synonymous	100	2.22222	6.77431e-34			Intergenic SNP	i00090	Cluster_9- between brnQ and yfiC_1	0	68.8889	2.60029e-19
Accessory	group_133	group_133	28.5714	62.2222	0.000308791			Core SNP	c00974	group_201-nonsynonymous (T238M)	100	2.22222	6.77431e-34			Intergenic SNP	i00089	Cluster_9- between brnQ and yfiC_1	0	68.8889	2.60029e-19
Accessory	group_4474	group_4474	7.14286	31.1111	0.000639577			Core SNP	c00973	group_201-synonymous	100	2.22222	6.77431e-34			Intergenic SNP	i00088	Cluster_9- between brnQ and yfiC_1	0	68.8889	2.60029e-19
Accessory	group_223	group_223	16.6667	44.4444	0.0013821			Core SNP	c00972	group_201-synonymous	100	2.22222	6.77431e-34			Intergenic SNP	i00087	Cluster_9- between brnQ and yfiC_1	0	68.8889	2.60029e-19
Accessory	blc	blc	83.3333	55.5556	0.0013821			Core SNP	c00971	group_201-synonymous	100	2.22222	6.77431e-34			Intergenic SNP	i00086	Cluster_9- between brnQ and yfiC_1	0	68.8889	2.60029e-19
Accessory	group_423	group_423	0	13.3333	0.00143193			Core SNP	c00970	group_201-nonsynonymous (V196M)	100	2.22222	6.77431e-34			Intergenic SNP	i00085	Cluster_9- between brnQ and yfiC_1	0	68.8889	2.60029e-19
Accessory	group_425	group_425	0	13.3333	0.00143193			Core SNP	c00969	group_201-synonymous	100	2.22222	6.77431e-34			Intergenic SNP	i00084	Cluster_9- between brnQ and yfiC_1	0	68.8889	2.60029e-19
Accessory	group_395	group_395	0	13.3333	0.00143193			Core SNP	c00968	group_201-synonymous	100	2.22222	6.77431e-34			Intergenic SNP	i00083	Cluster_9- between brnQ and yfiC_1	0	68.8889	2.60029e-19
Accessory	group_426	group_426	0	13.3333	0.00143193			Core SNP	c00975	group_201-synonymous	100	2.22222	6.77431e-34			Intergenic SNP	i00072	Cluster_9- between brnQ and yfiC_1	0	68.8889	2.60029e-19
Accessory	group_424	group_424	0	13.3333	0.00143193			Core SNP	c00967	group_201-synonymous	100	2.22222	6.77431e-34			Intergenic SNP	i00082	Cluster_9- between brnQ and yfiC_1	0	68.8889	2.60029e-19
Accessory	group_430	group_430	0	13.3333	0.00143193			Core SNP	c00965	group_201-synonymous	100	2.22222	6.77431e-34			Intergenic SNP	i00080	Cluster_9- between brnQ and yfiC_1	0	68.8889	2.60029e-19
Accessory	group_428	group_428	0	13.3333	0.00143193			Core SNP	c00964	group_201-nonsynonymous (E152D)	100	2.22222	6.77431e-34			Intergenic SNP	i00079	Cluster_9- between brnQ and yfiC_1	0	68.8889	2.60029e-19
Accessory	group_429	group_429	0	13.3333	0.00143193			Core SNP	c00963	group_201-synonymous	100	2.22222	6.77431e-34			Intergenic SNP	i00078	Cluster_9- between brnQ and yfiC_1	0	68.8889	2.60029e-19
Accessory	group_422	group_422	0	13.3333	0.00143193			Core SNP	c00962	group_201-synonymous	100	2.22222	6.77431e-34			Intergenic SNP	i00077	Cluster_9- between brnQ and yfiC_1	0	68.8889	2.60029e-19
Accessory	group_431	group_431	0	13.3333	0.00143193			Core SNP	c00961	group_201-synonymous	100	2.22222	6.77431e-34			Intergenic SNP	i00076	Cluster_9- between brnQ and yfiC_1	0	68.8889	2.60029e-19
Accessory	group_432	group_432	0	13.3333	0.00143193			Core SNP	c00960	group_201-nonsynonymous (T122A)	100	2.22222	6.77431e-34			Intergenic SNP	i00075	Cluster_9- between brnQ and yfiC_1	0	68.8889	2.60029e-19
Accessory	group_433	group_433	0	13.3333	0.00143193			Core SNP	c00959	group_201-synonymous	100	2.22222	6.77431e-34			Intergenic SNP	i00074	Cluster_9- between brnQ and yfiC_1	0	68.8889	2.60029e-19
Accessory	group_434	group_434	0	13.3333	0.00143193			Core SNP	c00966	group_201-nonsynonymous (R171L)	100	2.22222	6.77431e-34			Intergenic SNP	i00071	Cluster_9- between brnQ and yfiC_1	0	68.8889	2.60029e-19
Accessory	group_435	group_435	0	13.3333	0.00143193			Core SNP	c00976	group_201-synonymous	100	2.22222	6.77431e-34			Intergenic SNP	i00091	Cluster_9- between brnQ and yfiC_1	0	68.8889	2.60029e-19
Accessory	group_436	group_436	0	13.3333	0.00143193			Core SNP	c00977	group_201-synonymous	100	2.22222	6.77431e-34			Intergenic SNP	i00081	Cluster_9- between brnQ and yfiC_1	0	68.8889	2.60029e-19
Accessory	ptsG_1	ptsG_1	0	13.3333	0.00143193			Core SNP	c00978	group_201-synonymous	100	2.22222	6.77431e-34			Intergenic SNP	i00069	Cluster_9- between brnQ and yfiC_1	0	68.8889	2.60029e-19
Accessory	group_394	group_394	0	13.3333	0.00143193			Core SNP	c00995	group_202-synonymous	100	2.22222	6.77431e-34			Intergenic SNP	i00055	Cluster_9- between group_220 and group_339	0	68.8889	2.60029e-19
Accessory	group_393	group_393	0	13.3333	0.00143193			Core SNP	c00994	group_202-nonsynonymous (Q16R)	100	2.22222	6.77431e-34			Intergenic SNP	i00056	Cluster_9- between group_220 and group_339	0	68.8889	2.60029e-19
Accessory	group_392	group_392	0	13.3333	0.00143193			Core SNP	c00993	group_202-synonymous	100	2.22222	6.77431e-34			Intergenic SNP	i00057	Cluster_9- between group_220 and group_339	0	68.8889	2.60029e-19
Accessory	group_427	group_427	0	13.3333	0.00143193			Core SNP	c01020	group_203-nonsynonymous (D115G)	100	2.22222	6.77431e-34			Intergenic SNP	i00058	Cluster_9- between group_220 and group_339	0	68.8889	2.60029e-19
Accessory	group_421	group_421	0	13.3333	0.00143193			Core SNP	c00991	group_201-synonymous	100	2.22222	6.77431e-34			Intergenic SNP	i00059	Cluster_9- between group_220 and group_339	0	68.8889	2.60029e-19
Accessory	group_391	group_391	0	13.3333	0.00143193			Core SNP	c00990	group_201-synonymous	100	2.22222	6.77431e-34			Intergenic SNP	i00070	Cluster_9- between brnQ and yfiC_1	0	68.8889	2.60029e-19
Accessory	group_419	group_419	0	13.3333	0.00143193			Core SNP	c00989	group_201-synonymous	100	2.22222	6.77431e-34			Intergenic SNP	i00060	Cluster_9- between group_220 and group_339	0	68.8889	2.60029e-19
Accessory	group_401	group_401	0	13.3333	0.00143193			Core SNP	c00988	group_201-synonymous	100	2.22222	6.77431e-34			Intergenic SNP	i00061	Cluster_9- between group_220 and group_339	0	68.8889	2.60029e-19
Accessory	group_402	group_402	0	13.3333	0.00143193			Core SNP	c00987	group_201-synonymous	100	2.22222	6.77431e-34			Intergenic SNP	i00062	Cluster_9- between group_220 and group_339	0	68.8889	2.60029e-19
Accessory	group_403	group_403	0	13.3333	0.00143193			Core SNP	c00986	group_201-nonsynonymous (I323L)	100	2.22222	6.77431e-34			Intergenic SNP	i00063	Cluster_9- between brnQ and yfiC_1	0	68.8889	2.60029e-19
Accessory	group_404	group_404	0	13.3333	0.00143193			Core SNP	c00985	group_201-synonymous	100	2.22222	6.77431e-34			Intergenic SNP	i00064	Cluster_9- between brnQ and yfiC_1	0	68.8889	2.60029e-19
Accessory	group_405	group_405	0	13.3333	0.00143193			Core SNP	c00984	group_201-nonsynonymous (T314A)	100	2.22222	6.77431e-34			Intergenic SNP	i00065	Cluster_9- between brnQ and yfiC_1	0	68.8889	2.60029e-19
Accessory	group_407	group_407	0	13.3333	0.00143193			Core SNP	c00983	group_201-synonymous	100	2.22222	6.77431e-34			Intergenic SNP	i00066	Cluster_9- between brnQ and yfiC_1	0	68.8889	2.60029e-19
Accessory	group_408	group_408	0	13.3333	0.00143193			Core SNP	c00982	group_201-nonsynonymous (G296T)	100	2.22222	6.77431e-34			Intergenic SNP	i00067	Cluster_9- between brnQ and yfiC_1	0	68.8889	2.60029e-19
Accessory	group_409	group_409	0	13.3333	0.00143193			Core SNP	c00981	group_201-synonymous	100	2.22222	6.77431e-34			Intergenic SNP	i00068	Cluster_9- between brnQ and yfiC_1	0	68.8889	2.60029e-19
Accessory	group_410	group_410	0	13.3333	0.00143193			Core SNP	c00980	group_201-nonsynonymous (S282L)	100	2.22222	6.77431e-34			Intergenic SNP	i00054	Cluster_9- between group_220 and group_339	0	68.8889	2.60029e-19
Accessory	group_411	group_411	0	13.3333	0.00143193			Core SNP	c00979	group_201-synonymous	100	2.22222	6.77431e-34			Intergenic SNP	i00053	Cluster_9- between group_220 and group_339	0	68.8889	2.60029e-19
Accessory	group_412	group_412	0	13.3333	0.00143193			Core SNP	c00997	group_202-nonsynonymous (K61E)	100	2.22222	6.77431e-34			Intergenic SNP	i00011	Cluster_498- between group_2636 and folD	47.619	100	3.14853e-11
Accessory	group_413	group_413	0	13.3333	0.00143193			Core SNP	c01021	group_203-nonsynonymous (A117T)	100	2.22222	6.77431e-34			Intergenic SNP	i00051	Cluster_394- between emrD and group_3417	0	33.3333	2.30592e-08
Accessory	group_414	group_414	0	13.3333	0.00143193			Core SNP	c00775	group_199-nonsynonymous (S7N)	100	2.22222	6.77431e-34			Intergenic SNP	i00217	-	0	17.7778	0.000141418
Accessory	group_415	group_415	0	13.3333	0.00143193			Core SNP	c01023	group_203-nonsynonymous (A123V)	100	2.22222	6.77431e-34			Intergenic SNP	i00216	-	0	17.7778	0.000141418
Accessory	group_400	group_400	0	13.3333	0.00143193			Core SNP	c01085	group_206-nonsynonymous (D111E)	100	2.22222	6.77431e-34			Intergenic SNP	i00219	-	0	17.7778	0.000141418
Accessory	group_399	group_399	0	13.3333	0.00143193			Core SNP	c01084	group_206-synonymous	100	2.22222	6.77431e-34			Intergenic SNP	i00218	-	0	17.7778	0.000141418
Accessory	group_398	group_398	0	13.3333	0.00143193			Core SNP	c01083	group_206-synonymous	100	2.22222	6.77431e-34			Intergenic SNP	i00038	Cluster_715- between VC_2751 and tRNA-Asp(gtc)	23.8095	0	0.000160592
Accessory	group_416	group_416	0	13.3333	0.00143193			Core SNP	c01082	group_206-synonymous	100	2.22222	6.77431e-34			Intergenic SNP	i00037	Cluster_715- between VC_2751 and tRNA-Asp(gtc)	21.4286	0	0.00029682
Accessory	group_397	group_397	0	13.3333	0.00143193			Core SNP	c01081	group_206-synonymous	100	2.22222	6.77431e-34			Intergenic SNP	i00036	Cluster_715- between VC_2751 and tRNA-Asp(gtc)	20.2381	0	0.000583798
Accessory	group_417	group_417	0	13.3333	0.00143193			Core SNP	c01080	group_206-nonsynonymous (L51Q)	100	2.22222	6.77431e-34			Intergenic SNP	i00005	Cluster_688- between treR and treB	0	8.88889	0.0135335
Accessory	group_418	group_418	0	13.3333	0.00143193			Core SNP	c01079	group_206-synonymous	100	2.22222	6.77431e-34			Intergenic SNP	i00004	Cluster_217- between ltxB and group_2041	10.7143	0	0.026611
Accessory	group_420	group_420	0	13.3333	0.00143193			Core SNP	c01078	group_206-nonsynonymous (P29T)	100	2.22222	6.77431e-34			Intergenic SNP	i00041	Cluster_1495- between trmO and rpmE2	8.33333	0	0.095228
Accessory	group_396	group_396	0	13.3333	0.00143193			Core SNP	c01086	group_206-synonymous	100	2.22222	6.77431e-34			Intergenic SNP	i00097	Cluster_470- between group_3326 and leuO_1	0	4.44444	0.119913
Accessory	group_406	group_406	0	13.3333	0.00143193			Core SNP	c01077	group_206-nonsynonymous (S27P)	100	2.22222	6.77431e-34			Intergenic SNP	i00096	Cluster_1425- between truB and rpsO	0	4.44444	0.119913
Accessory	group_367	group_367	14.2857	40	0.00185422			Core SNP	c01075	group_205-synonymous	100	2.22222	6.77431e-34			Intergenic SNP	i00042	Cluster_1820- between group_2462 and lptG	0	2.22222	0.348837
Accessory	group_222	group_222	26.1905	55.5556	0.00192118			Core SNP	c01074	group_205-synonymous	100	2.22222	6.77431e-34			Intergenic SNP	i00047	Cluster_1653- between cydD and trxB	0	2.22222	0.348837
Accessory	group_35	group_35	16.6667	0	0.00217736			Core SNP	c01073	group_205-nonsynonymous (L277V)	100	2.22222	6.77431e-34			Intergenic SNP	i00019	Cluster_111- between group_3880 and tcpA	0	2.22222	0.348837
Accessory	group_4340	group_4340	75	48.8889	0.00364402			Core SNP	c01072	group_205-synonymous	100	2.22222	6.77431e-34			Intergenic SNP	i00025	Cluster_488- between aroG and glnQ_2	0	2.22222	0.348837
Accessory	group_323	group_323	3.57143	20	0.0036866			Core SNP	c01071	group_205-synonymous	100	2.22222	6.77431e-34			Intergenic SNP	i00012	Cluster_1248- between lolB and hemA	0	2.22222	0.348837
Accessory	group_4341	group_4341	16.6667	40	0.00517364			Core SNP	c01070	group_205-synonymous	100	2.22222	6.77431e-34			Intergenic SNP	i00016	Cluster_168- between rpsJ and rlmB_1	0	2.22222	0.348837
Accessory	group_4471	group_4471	9.52381	28.8889	0.0062811			Core SNP	c01069	group_205-synonymous	100	2.22222	6.77431e-34			Intergenic SNP	i00093	Cluster_15- between group_2262 and group_1217	0	2.22222	0.348837
Accessory	group_32	group_32	2.38095	15.5556	0.00864642			Core SNP	c01068	group_205-synonymous	100	2.22222	6.77431e-34			Intergenic SNP	i00095	Cluster_2535- between gdx and group_1957	0	2.22222	0.348837
Accessory	group_33	group_33	54.7619	77.7778	0.0127586			Core SNP	c01076	group_206-nonsynonymous (S11T)	100	2.22222	6.77431e-34			Intergenic SNP	i00094	Cluster_15- between group_2262 and group_1217	0	2.22222	0.348837
Accessory	group_111	group_111	79.7619	95.5556	0.0180541			Core SNP	c01087	group_206-synonymous	100	2.22222	6.77431e-34			Intergenic SNP	i00002	Cluster_2003- between sdaA_1 and sdaC_1	0	2.22222	0.348837
Accessory	group_756	group_756	5.95238	20	0.019357			Core SNP	c01088	group_206-synonymous	100	2.22222	6.77431e-34			Intergenic SNP	i00026	Cluster_73- between clsA and group_4036	0	2.22222	0.348837
Accessory	group_380	group_380	33.3333	13.3333	0.0201611			Core SNP	c01089	group_206-nonsynonymous (Y134D)	100	2.22222	6.77431e-34			Intergenic SNP	i00092	Cluster_15- between group_2262 and group_1217	2.38095	0	0.542151
Accessory	group_134	group_134	22.619	42.2222	0.0259936			Core SNP	c01108	group_206-synonymous	100	2.22222	6.77431e-34			Intergenic SNP	i00007	Cluster_1039- between pckA and group_2055	2.38095	0	0.542151
Accessory	group_39	group_39	22.619	6.66667	0.0263509			Core SNP	c01107	group_206-nonsynonymous (-196*)	100	2.22222	6.77431e-34			Intergenic SNP	i00035	Cluster_2072- between tatC and tatB	2.38095	0	0.542151
Accessory	group_38	group_38	10.7143	0	0.026611			Core SNP	c01106	group_206-nonsynonymous (-196*)	100	2.22222	6.77431e-34			Intergenic SNP	i00034	Cluster_2072- between tatC and tatB	2.38095	0	0.542151
Accessory	group_19	group_19	100	93.3333	0.0406004			Core SNP	c01105	group_206-nonsynonymous (-195F)	100	2.22222	6.77431e-34			Intergenic SNP	i00033	Cluster_2072- between tatC and tatB	2.38095	0	0.542151
Accessory	group_438	group_438	4.7619	15.5556	0.048882			Core SNP	c01104	group_206-nonsynonymous (-194R)	100	2.22222	6.77431e-34			Intergenic SNP	i00032	Cluster_2072- between tatC and tatB	2.38095	0	0.542151
Accessory	group_9	group_9	90.4762	100	0.049872			Core SNP	c01103	group_206-nonsynonymous (-193V)	100	2.22222	6.77431e-34			Intergenic SNP	i00023	Cluster_496- between sdaC_1 and nudL	2.38095	0	0.542151
Accessory	group_384	group_384	16.6667	4.44444	0.0520416			Core SNP	c01102	group_206-synonymous	100	2.22222	6.77431e-34			Intergenic SNP	i00008	Cluster_1177- between group_3601 and group_2185	2.38095	0	0.542151
Accessory	group_255	group_255	59.5238	75.5556	0.0824584			Core SNP	c01101	group_206-nonsynonymous (C187N)	100	2.22222	6.77431e-34			Intergenic SNP	i00021	Cluster_482- between group_3174 and fadL	1.19048	0	1
Accessory	group_4312	group_4312	67.8571	82.2222	0.0980492			Core SNP	c01100	group_206-synonymous	100	2.22222	6.77431e-34			Intergenic SNP	i00215	Cluster_22- between group_3319 and group_4446	2.38095	2.22222	1
Accessory	group_4342	group_4342	10.7143	22.2222	0.116054			Core SNP	c01099	group_206-synonymous	100	2.22222	6.77431e-34			Intergenic SNP	i00022	Cluster_31- between group_2195 and rcsC_8	1.19048	0	1
Accessory	group_228	group_228	100	95.5556	0.119913			Core SNP	c01098	group_206-synonymous	100	2.22222	6.77431e-34			Intergenic SNP	i00018	Cluster_278- between ugd and group_2535	1.19048	0	1
Accessory	group_385	group_385	57.1429	42.2222	0.139163			Core SNP	c01097	group_206-synonymous	100	2.22222	6.77431e-34			Intergenic SNP	i00010	Cluster_163- between mioC and mnmG	1.19048	0	1
Accessory	group_246	group_246	42.8571	57.7778	0.139163			Core SNP	c01096	group_206-synonymous	100	2.22222	6.77431e-34			Intergenic SNP	i00013	Cluster_1238- between msrB_2 and group_1647	1.19048	0	1
Accessory	pckA	pckA	90.4762	97.7778	0.160215			Core SNP	c01095	group_206-synonymous	100	2.22222	6.77431e-34			Intergenic SNP	i00024	Cluster_934- between cutC and group_2946	1.19048	0	1
Accessory	group_4369	group_4369	69.0476	55.5556	0.176654			Core SNP	c01094	group_206-synonymous	100	2.22222	6.77431e-34			Intergenic SNP	i00214	Cluster_22- between group_3319 and group_4446	98.8095	100	1
Accessory	group_383	group_383	11.9048	4.44444	0.213902			Core SNP	c01093	group_206-nonsynonymous (P145S)	100	2.22222	6.77431e-34			Intergenic SNP	i00098	Cluster_913- between group_1532 and ygiF	1.19048	0	1
Accessory	hpt	hpt	98.8095	95.5556	0.278538			Core SNP	c01092	group_206-synonymous	100	2.22222	6.77431e-34			Intergenic SNP	i00029	Cluster_905- between group_2082 and nagK	1.19048	0	1
Accessory	group_4317	group_4317	27.381	17.7778	0.281922			Core SNP	c01091	group_206-nonsynonymous (I142L)	100	2.22222	6.77431e-34			Intergenic SNP	i00171	Cluster_222- between rapA and group_167	1.19048	2.22222	1
Accessory	group_4370	group_4370	21.4286	31.1111	0.285218			Core SNP	c01090	group_206-synonymous	100	2.22222	6.77431e-34			Intergenic SNP	i00172	Cluster_222- between rapA and group_167	1.19048	2.22222	1
Accessory	acuC	acuC	95.2381	100	0.297061			Core SNP	c01067	group_205-synonymous	100	2.22222	6.77431e-34			Intergenic SNP	i00173	Cluster_222- between rapA and group_167	1.19048	2.22222	1
Accessory	group_94	group_94	95.2381	100	0.297061			Core SNP	c01022	group_203-synonymous	100	2.22222	6.77431e-34			Intergenic SNP	i00174	Cluster_222- between rapA and group_167	1.19048	2.22222	1
Accessory	group_114	group_114	4.7619	0	0.297061			Core SNP	c01066	group_205-nonsynonymous (I205T)	100	2.22222	6.77431e-34			Intergenic SNP	i00175	Cluster_222- between rapA and group_167	1.19048	2.22222	1
Accessory	group_706	group_706	0	2.22222	0.348837			Core SNP	c01064	group_205-synonymous	100	2.22222	6.77431e-34			Intergenic SNP	i00176	Cluster_421- between group_120 and group_318	1.19048	2.22222	1
Accessory	group_696	group_696	0	2.22222	0.348837			Core SNP	c01040	group_205-synonymous	100	2.22222	6.77431e-34			Intergenic SNP	i00177	Cluster_421- between group_120 and group_318	1.19048	2.22222	1
Accessory	group_697	group_697	0	2.22222	0.348837			Core SNP	c01039	group_205-synonymous	100	2.22222	6.77431e-34			Intergenic SNP	i00027	Cluster_100- between malT_1 and malP	1.19048	0	1
Accessory	group_698	group_698	0	2.22222	0.348837			Core SNP	c01038	group_205-synonymous	100	2.22222	6.77431e-34			Intergenic SNP	i00178	Cluster_1552- between group_102 and intS	1.19048	2.22222	1
Accessory	group_699	group_699	0	2.22222	0.348837			Core SNP	c01037	group_205-synonymous	100	2.22222	6.77431e-34			Intergenic SNP	i00180	Cluster_1552- between group_102 and intS	1.19048	2.22222	1
Accessory	group_700	group_700	0	2.22222	0.348837			Core SNP	c01036	group_205-nonsynonymous (M17I)	100	2.22222	6.77431e-34			Intergenic SNP	i00052	Cluster_9- between group_220 and group_339	1.19048	0	1
Accessory	group_716	group_716	0	2.22222	0.348837			Core SNP	c01035	group_205-synonymous	100	2.22222	6.77431e-34			Intergenic SNP	i00050	Cluster_55- between glpF and glpA	1.19048	0	1
Accessory	yjlD	yjlD	0	2.22222	0.348837			Core SNP	c01034	group_204-nonsynonymous (T171A)	100	2.22222	6.77431e-34			Intergenic SNP	i00049	Cluster_27	1.19048	0	1
Accessory	group_715	group_715	0	2.22222	0.348837			Core SNP	c00958	group_201-synonymous	100	2.22222	6.77431e-34			Intergenic SNP	i00048	Cluster_907- between group_4300 and group_2099	1.19048	0	1
Accessory	group_708	group_708	0	2.22222	0.348837			Core SNP	c01041	group_205-synonymous	100	2.22222	6.77431e-34			Intergenic SNP	i00045	Cluster_559	1.19048	0	1
Accessory	group_703	group_703	0	2.22222	0.348837			Core SNP	c01033	group_204-synonymous	100	2.22222	6.77431e-34			Intergenic SNP	i00030	Cluster_905- between group_2082 and nagK	1.19048	2.22222	1
Accessory	group_714	group_714	0	2.22222	0.348837			Core SNP	c01031	group_204-synonymous	100	2.22222	6.77431e-34			Intergenic SNP	i00179	Cluster_1552- between group_102 and intS	1.19048	2.22222	1
Accessory	group_704	group_704	0	2.22222	0.348837			Core SNP	c01030	group_204-synonymous	100	2.22222	6.77431e-34			Intergenic SNP	i00001	Cluster_571- between group_1398 and group_2827	1.19048	0	1
Accessory	group_713	group_713	0	2.22222	0.348837			Core SNP	c01029	group_204-synonymous	100	2.22222	6.77431e-34
Accessory	group_712	group_712	0	2.22222	0.348837			Core SNP	c01028	group_204-nonsynonymous (A83S)	100	2.22222	6.77431e-34
Accessory	group_705	group_705	0	2.22222	0.348837			Core SNP	c01027	group_204-nonsynonymous (M81I)	100	2.22222	6.77431e-34
Accessory	group_711	group_711	0	2.22222	0.348837			Core SNP	c01026	group_204-nonsynonymous (V125A)	100	2.22222	6.77431e-34
Accessory	dxs_2	dxs_2	0	2.22222	0.348837			Core SNP	c01025	group_204-nonsynonymous (H12Q)	100	2.22222	6.77431e-34
Accessory	group_709	group_709	0	2.22222	0.348837			Core SNP	c01024	group_203-synonymous	100	2.22222	6.77431e-34
Accessory	rny	rny	0	2.22222	0.348837			Core SNP	c01032	group_204-synonymous	100	2.22222	6.77431e-34
Accessory	group_707	group_707	0	2.22222	0.348837			Core SNP	c01042	group_205-nonsynonymous (S54T)	100	2.22222	6.77431e-34
Accessory	bglA_2	bglA_2	0	2.22222	0.348837			Core SNP	c01043	group_205-nonsynonymous (S56P)	100	2.22222	6.77431e-34
Accessory	group_694	group_694	0	2.22222	0.348837			Core SNP	c01044	group_205-nonsynonymous (A58S)	100	2.22222	6.77431e-34
Accessory	der_2	der_2	0	2.22222	0.348837			Core SNP	c01063	group_205-synonymous	100	2.22222	6.77431e-34
Accessory	group_673	group_673	0	2.22222	0.348837			Core SNP	c01062	group_205-synonymous	100	2.22222	6.77431e-34
Accessory	group_674	group_674	0	2.22222	0.348837			Core SNP	c01061	group_205-synonymous	100	2.22222	6.77431e-34
Accessory	group_675	group_675	0	2.22222	0.348837			Core SNP	c01060	group_205-synonymous	100	2.22222	6.77431e-34
Accessory	glnM	glnM	0	2.22222	0.348837			Core SNP	c01059	group_205-synonymous	100	2.22222	6.77431e-34
Accessory	group_677	group_677	0	2.22222	0.348837			Core SNP	c01058	group_205-nonsynonymous (N178I)	100	2.22222	6.77431e-34
Accessory	msmX	msmX	0	2.22222	0.348837			Core SNP	c01057	group_205-synonymous	100	2.22222	6.77431e-34
Accessory	group_679	group_679	0	2.22222	0.348837			Core SNP	c01056	group_205-synonymous	100	2.22222	6.77431e-34
Accessory	group_68	group_68	0	2.22222	0.348837			Core SNP	c01055	group_205-synonymous	100	2.22222	6.77431e-34
Accessory	gpsA_2	gpsA_2	0	2.22222	0.348837			Core SNP	c01054	group_205-synonymous	100	2.22222	6.77431e-34
Accessory	fusA_3	fusA_3	0	2.22222	0.348837			Core SNP	c01053	group_205-synonymous	100	2.22222	6.77431e-34
Accessory	group_682	group_682	0	2.22222	0.348837			Core SNP	c01052	group_205-nonsynonymous (K93Q)	100	2.22222	6.77431e-34
Accessory	nifA	nifA	0	2.22222	0.348837			Core SNP	c01051	group_205-synonymous	100	2.22222	6.77431e-34
Accessory	group_717	group_717	0	2.22222	0.348837			Core SNP	c01050	group_205-synonymous	100	2.22222	6.77431e-34
Accessory	group_685	group_685	0	2.22222	0.348837			Core SNP	c01049	group_205-synonymous	100	2.22222	6.77431e-34
Accessory	group_686	group_686	0	2.22222	0.348837			Core SNP	c01048	group_205-nonsynonymous (T64M)	100	2.22222	6.77431e-34
Accessory	group_687	group_687	0	2.22222	0.348837			Core SNP	c01047	group_205-nonsynonymous (T61V)	100	2.22222	6.77431e-34
Accessory	rnj1	rnj1	0	2.22222	0.348837			Core SNP	c01046	group_205-nonsynonymous (A59T)	100	2.22222	6.77431e-34
Accessory	group_689	group_689	0	2.22222	0.348837			Core SNP	c01045	group_205-synonymous	100	2.22222	6.77431e-34
Accessory	group_690	group_690	0	2.22222	0.348837			Core SNP	c01065	group_205-nonsynonymous (V201G)	100	2.22222	6.77431e-34
Accessory	group_691	group_691	0	2.22222	0.348837			Core SNP	c00957	group_201-nonsynonymous (A94V)	100	2.22222	6.77431e-34
Accessory	group_692	group_692	0	2.22222	0.348837			Core SNP	c00946	group_201-nonsynonymous (A15S)	100	2.22222	6.77431e-34
Accessory	group_693	group_693	0	2.22222	0.348837			Core SNP	c00955	group_201-synonymous	100	2.22222	6.77431e-34
Accessory	group_695	group_695	0	2.22222	0.348837			Core SNP	c00838	group_200-nonsynonymous (P390L)	100	2.22222	6.77431e-34
Accessory	rbsR_2	rbsR_2	0	2.22222	0.348837			Core SNP	c00837	group_200-synonymous	100	2.22222	6.77431e-34
Accessory	group_769	group_769	0	2.22222	0.348837			Core SNP	c00836	group_200-synonymous	100	2.22222	6.77431e-34
Accessory	group_720	group_720	0	2.22222	0.348837			Core SNP	c00835	group_200-synonymous	100	2.22222	6.77431e-34
Accessory	group_791	group_791	0	2.22222	0.348837			Core SNP	c00834	group_200-synonymous	100	2.22222	6.77431e-34
Accessory	group_790	group_790	0	2.22222	0.348837			Core SNP	c00833	group_200-synonymous	100	2.22222	6.77431e-34
Accessory	group_789	group_789	0	2.22222	0.348837			Core SNP	c00832	group_200-synonymous	100	2.22222	6.77431e-34
Accessory	group_788	group_788	0	2.22222	0.348837			Core SNP	c00831	group_200-nonsynonymous (P310L)	100	2.22222	6.77431e-34
Accessory	group_787	group_787	0	2.22222	0.348837			Core SNP	c00839	group_200-synonymous	100	2.22222	6.77431e-34
Accessory	yfbR_2	yfbR_2	0	2.22222	0.348837			Core SNP	c00830	group_200-synonymous	100	2.22222	6.77431e-34
Accessory	group_785	group_785	0	2.22222	0.348837			Core SNP	c00828	group_200-synonymous	100	2.22222	6.77431e-34
Accessory	group_784	group_784	0	2.22222	0.348837			Core SNP	c00827	group_200-synonymous	100	2.22222	6.77431e-34
Accessory	group_783	group_783	0	2.22222	0.348837			Core SNP	c00826	group_200-synonymous	100	2.22222	6.77431e-34
Accessory	group_782	group_782	0	2.22222	0.348837			Core SNP	c00825	group_200-synonymous	100	2.22222	6.77431e-34
Accessory	group_772	group_772	0	2.22222	0.348837			Core SNP	c00824	group_200-synonymous	100	2.22222	6.77431e-34
Accessory	group_781	group_781	0	2.22222	0.348837			Core SNP	c00823	group_200-synonymous	100	2.22222	6.77431e-34
Accessory	group_780	group_780	0	2.22222	0.348837			Core SNP	c00822	group_200-synonymous	100	2.22222	6.77431e-34
Accessory	group_779	group_779	0	2.22222	0.348837			Core SNP	c00821	group_200-synonymous	100	2.22222	6.77431e-34
Accessory	group_671	group_671	0	2.22222	0.348837			Core SNP	c00829	group_200-nonsynonymous (K299R)	100	2.22222	6.77431e-34
Accessory	group_778	group_778	0	2.22222	0.348837			Core SNP	c00840	group_200-synonymous	100	2.22222	6.77431e-34
Accessory	group_773	group_773	0	2.22222	0.348837			Core SNP	c00841	group_200-synonymous	100	2.22222	6.77431e-34
Accessory	group_774	group_774	0	2.22222	0.348837			Core SNP	c00842	group_200-synonymous	100	2.22222	6.77431e-34
Accessory	group_775	group_775	0	2.22222	0.348837			Core SNP	c00861	group_200-synonymous	100	2.22222	6.77431e-34
Accessory	group_776	group_776	0	2.22222	0.348837			Core SNP	c00860	group_200-synonymous	100	2.22222	6.77431e-34
Accessory	group_777	group_777	0	2.22222	0.348837			Core SNP	c00859	group_200-synonymous	100	2.22222	6.77431e-34
Accessory	group_792	group_792	0	2.22222	0.348837			Core SNP	c00858	group_200-synonymous	100	2.22222	6.77431e-34
Accessory	group_719	group_719	0	2.22222	0.348837			Core SNP	c00857	group_200-synonymous	100	2.22222	6.77431e-34
Accessory	group_793	group_793	0	2.22222	0.348837			Core SNP	c00856	group_200-synonymous	100	2.22222	6.77431e-34
Accessory	orn_1	orn_1	0	2.22222	0.348837			Core SNP	c00855	group_200-synonymous	100	2.22222	6.77431e-34
Accessory	group_721	group_721	0	2.22222	0.348837			Core SNP	c00854	group_200-synonymous	100	2.22222	6.77431e-34
Accessory	group_722	group_722	0	2.22222	0.348837			Core SNP	c00853	group_200-synonymous	100	2.22222	6.77431e-34
Accessory	group_723	group_723	0	2.22222	0.348837			Core SNP	c00852	group_200-synonymous	100	2.22222	6.77431e-34
Accessory	group_724	group_724	0	2.22222	0.348837			Core SNP	c00851	group_200-synonymous	100	2.22222	6.77431e-34
Accessory	group_725	group_725	0	2.22222	0.348837			Core SNP	c00850	group_200-synonymous	100	2.22222	6.77431e-34
Accessory	group_726	group_726	0	2.22222	0.348837			Core SNP	c00849	group_200-synonymous	100	2.22222	6.77431e-34
Accessory	group_727	group_727	0	2.22222	0.348837			Core SNP	c00848	group_200-synonymous	100	2.22222	6.77431e-34
Accessory	rplF_2	rplF_2	0	2.22222	0.348837			Core SNP	c00847	group_200-synonymous	100	2.22222	6.77431e-34
Accessory	gadB	gadB	0	2.22222	0.348837			Core SNP	c00846	group_200-synonymous	100	2.22222	6.77431e-34
Accessory	group_730	group_730	0	2.22222	0.348837			Core SNP	c00845	group_200-synonymous	100	2.22222	6.77431e-34
Accessory	group_765	group_765	0	2.22222	0.348837			Core SNP	c00844	group_200-synonymous	100	2.22222	6.77431e-34
Accessory	group_766	group_766	0	2.22222	0.348837			Core SNP	c00843	group_200-synonymous	100	2.22222	6.77431e-34
Accessory	group_767	group_767	0	2.22222	0.348837			Core SNP	c00820	group_200-nonsynonymous (R225S)	100	2.22222	6.77431e-34
Accessory	group_768	group_768	0	2.22222	0.348837			Core SNP	c00862	group_200-synonymous	100	2.22222	6.77431e-34
Accessory	group_77	group_77	0	2.22222	0.348837			Core SNP	c00819	group_200-synonymous	100	2.22222	6.77431e-34
Accessory	group_770	group_770	0	2.22222	0.348837			Core SNP	c00817	group_200-synonymous	100	2.22222	6.77431e-34
Accessory	group_771	group_771	0	2.22222	0.348837			Core SNP	c00793	group_199-synonymous	100	2.22222	6.77431e-34
Accessory	group_799	group_799	0	2.22222	0.348837			Core SNP	c00792	group_199-synonymous	100	2.22222	6.77431e-34
Accessory	group_798	group_798	0	2.22222	0.348837			Core SNP	c00791	group_199-synonymous	100	2.22222	6.77431e-34
Accessory	group_797	group_797	0	2.22222	0.348837			Core SNP	c00790	group_199-synonymous	100	2.22222	6.77431e-34
Accessory	group_796	group_796	0	2.22222	0.348837			Core SNP	c00789	group_199-synonymous	100	2.22222	6.77431e-34
Accessory	group_794	group_794	0	2.22222	0.348837			Core SNP	c00788	group_199-synonymous	100	2.22222	6.77431e-34
Accessory	opuAA	opuAA	0	2.22222	0.348837			Core SNP	c00787	group_199-synonymous	100	2.22222	6.77431e-34
Accessory	group_477	group_477	0	2.22222	0.348837			Core SNP	c00786	group_199-synonymous	100	2.22222	6.77431e-34
Accessory	group_668	group_668	0	2.22222	0.348837			Core SNP	c00794	group_199-nonsynonymous (E193K)	100	2.22222	6.77431e-34
Accessory	group_599	group_599	0	2.22222	0.348837			Core SNP	c00785	group_199-nonsynonymous (S122A)	100	2.22222	6.77431e-34
Accessory	grdA	grdA	0	2.22222	0.348837			Core SNP	c00783	group_199-nonsynonymous (S86T)	100	2.22222	6.77431e-34
Accessory	group_800	group_800	0	2.22222	0.348837			Core SNP	c00782	group_199-synonymous	100	2.22222	6.77431e-34
Accessory	group_601	group_601	0	2.22222	0.348837			Core SNP	c00781	group_199-nonsynonymous (S78A)	100	2.22222	6.77431e-34
Accessory	por_1	por_1	0	2.22222	0.348837			Core SNP	c00780	group_199-synonymous	100	2.22222	6.77431e-34
Accessory	group_603	group_603	0	2.22222	0.348837			Core SNP	c00779	group_199-nonsynonymous (D57E)	100	2.22222	6.77431e-34
Accessory	group_604	group_604	0	2.22222	0.348837			Core SNP	c00778	group_199-nonsynonymous (E52D)	100	2.22222	6.77431e-34
Accessory	macB_3	macB_3	0	2.22222	0.348837			Core SNP	c00777	group_199-synonymous	100	2.22222	6.77431e-34
Accessory	group_606	group_606	0	2.22222	0.348837			Core SNP	c00776	group_199-synonymous	100	2.22222	6.77431e-34
Accessory	hisS_2	hisS_2	0	2.22222	0.348837			Core SNP	c00784	group_199-synonymous	100	2.22222	6.77431e-34
Accessory	ycsE	ycsE	0	2.22222	0.348837			Core SNP	c00795	group_199-synonymous	100	2.22222	6.77431e-34
Accessory	group_609	group_609	0	2.22222	0.348837			Core SNP	c00796	group_200-nonsynonymous (L5F)	100	2.22222	6.77431e-34
Accessory	gbuC	gbuC	0	2.22222	0.348837			Core SNP	c00797	group_200-synonymous	100	2.22222	6.77431e-34
Accessory	group_611	group_611	0	2.22222	0.348837			Core SNP	c00816	group_200-synonymous	100	2.22222	6.77431e-34
Accessory	group_612	group_612	0	2.22222	0.348837			Core SNP	c00815	group_200-synonymous	100	2.22222	6.77431e-34
Accessory	cbiF	cbiF	0	2.22222	0.348837			Core SNP	c00814	group_200-synonymous	100	2.22222	6.77431e-34
Accessory	rbsA_2	rbsA_2	0	2.22222	0.348837			Core SNP	c00813	group_200-synonymous	100	2.22222	6.77431e-34
Accessory	group_615	group_615	0	2.22222	0.348837			Core SNP	c00812	group_200-synonymous	100	2.22222	6.77431e-34
Accessory	group_616	group_616	0	2.22222	0.348837			Core SNP	c00811	group_200-nonsynonymous (G113S)	100	2.22222	6.77431e-34
Accessory	group_617	group_617	0	2.22222	0.348837			Core SNP	c00810	group_200-nonsynonymous (A95T)	100	2.22222	6.77431e-34
Accessory	group_618	group_618	0	2.22222	0.348837			Core SNP	c00809	group_200-synonymous	100	2.22222	6.77431e-34
Accessory	group_598	group_598	0	2.22222	0.348837			Core SNP	c00808	group_200-synonymous	100	2.22222	6.77431e-34
Accessory	group_619	group_619	0	2.22222	0.348837			Core SNP	c00807	group_200-synonymous	100	2.22222	6.77431e-34
Accessory	group_597	group_597	0	2.22222	0.348837			Core SNP	c00806	group_200-nonsynonymous (N67H)	100	2.22222	6.77431e-34
Accessory	group_595	group_595	0	2.22222	0.348837			Core SNP	c00805	group_200-nonsynonymous (L60S)	100	2.22222	6.77431e-34
Accessory	group_575	group_575	0	2.22222	0.348837			Core SNP	c00804	group_200-nonsynonymous (L60S)	100	2.22222	6.77431e-34
Accessory	group_576	group_576	0	2.22222	0.348837			Core SNP	c00803	group_200-synonymous	100	2.22222	6.77431e-34
Accessory	group_577	group_577	0	2.22222	0.348837			Core SNP	c00802	group_200-synonymous	100	2.22222	6.77431e-34
Accessory	group_578	group_578	0	2.22222	0.348837			Core SNP	c00801	group_200-synonymous	100	2.22222	6.77431e-34
Accessory	celD	celD	0	2.22222	0.348837			Core SNP	c00800	group_200-synonymous	100	2.22222	6.77431e-34
Accessory	btuD_6	btuD_6	0	2.22222	0.348837			Core SNP	c00799	group_200-synonymous	100	2.22222	6.77431e-34
Accessory	group_581	group_581	0	2.22222	0.348837			Core SNP	c00798	group_200-nonsynonymous (V13I)	100	2.22222	6.77431e-34
Accessory	group_582	group_582	0	2.22222	0.348837			Core SNP	c00818	group_200-synonymous	100	2.22222	6.77431e-34
Accessory	group_583	group_583	0	2.22222	0.348837			Core SNP	c00863	group_200-synonymous	100	2.22222	6.77431e-34
Accessory	lplJ	lplJ	0	2.22222	0.348837			Core SNP	c00864	group_200-synonymous	100	2.22222	6.77431e-34
Accessory	group_585	group_585	0	2.22222	0.348837			Core SNP	c00865	group_200-synonymous	100	2.22222	6.77431e-34
Accessory	group_586	group_586	0	2.22222	0.348837			Core SNP	c00930	group_200-synonymous	100	2.22222	6.77431e-34
Accessory	group_587	group_587	0	2.22222	0.348837			Core SNP	c00929	group_200-nonsynonymous (Q1154L)	100	2.22222	6.77431e-34
Accessory	group_588	group_588	0	2.22222	0.348837			Core SNP	c00928	group_200-synonymous	100	2.22222	6.77431e-34
Accessory	group_589	group_589	0	2.22222	0.348837			Core SNP	c00927	group_200-synonymous	100	2.22222	6.77431e-34
Accessory	group_59	group_59	0	2.22222	0.348837			Core SNP	c00926	group_200-synonymous	100	2.22222	6.77431e-34
Accessory	group_590	group_590	0	2.22222	0.348837			Core SNP	c00925	group_200-synonymous	100	2.22222	6.77431e-34
Accessory	group_591	group_591	0	2.22222	0.348837			Core SNP	c00924	group_200-synonymous	100	2.22222	6.77431e-34
Accessory	group_592	group_592	0	2.22222	0.348837			Core SNP	c01109	group_207-synonymous	100	2.22222	6.77431e-34
Accessory	yjeM	yjeM	0	2.22222	0.348837			Core SNP	c00931	group_200-synonymous	100	2.22222	6.77431e-34
Accessory	group_594	group_594	0	2.22222	0.348837			Core SNP	c00923	group_200-synonymous	100	2.22222	6.77431e-34
Accessory	mprF	mprF	0	2.22222	0.348837			Core SNP	c00921	group_200-synonymous	100	2.22222	6.77431e-34
Accessory	group_669	group_669	0	2.22222	0.348837			Core SNP	c00920	group_200-synonymous	100	2.22222	6.77431e-34
Accessory	group_620	group_620	0	2.22222	0.348837			Core SNP	c00919	group_200-synonymous	100	2.22222	6.77431e-34
Accessory	group_622	group_622	0	2.22222	0.348837			Core SNP	c00918	group_200-synonymous	100	2.22222	6.77431e-34
Accessory	group_647	group_647	0	2.22222	0.348837			Core SNP	c00917	group_200-synonymous	100	2.22222	6.77431e-34
Accessory	group_648	group_648	0	2.22222	0.348837			Core SNP	c00916	group_200-synonymous	100	2.22222	6.77431e-34
Accessory	mepA_4	mepA_4	0	2.22222	0.348837			Core SNP	c00915	group_200-synonymous	100	2.22222	6.77431e-34
Accessory	glmM_2	glmM_2	0	2.22222	0.348837			Core SNP	c00914	group_200-synonymous	100	2.22222	6.77431e-34
Accessory	group_651	group_651	0	2.22222	0.348837			Core SNP	c00922	group_200-synonymous	100	2.22222	6.77431e-34
Accessory	group_652	group_652	0	2.22222	0.348837			Core SNP	c00932	group_200-synonymous	100	2.22222	6.77431e-34
Accessory	xerC_3	xerC_3	0	2.22222	0.348837			Core SNP	c00933	group_200-synonymous	100	2.22222	6.77431e-34
Accessory	cdaA	cdaA	0	2.22222	0.348837			Core SNP	c00934	group_200-synonymous	100	2.22222	6.77431e-34
Accessory	ptsH_2	ptsH_2	0	2.22222	0.348837			Core SNP	c00954	group_201-synonymous	100	2.22222	6.77431e-34
Accessory	group_656	group_656	0	2.22222	0.348837			Core SNP	c00953	group_201-synonymous	100	2.22222	6.77431e-34
Accessory	bglC	bglC	0	2.22222	0.348837			Core SNP	c00952	group_201-synonymous	100	2.22222	6.77431e-34
Accessory	group_658	group_658	0	2.22222	0.348837			Core SNP	c00951	group_201-synonymous	100	2.22222	6.77431e-34
Accessory	metN_2	metN_2	0	2.22222	0.348837			Core SNP	c00950	group_201-synonymous	100	2.22222	6.77431e-34
Accessory	group_660	group_660	0	2.22222	0.348837			Core SNP	c00949	group_201-synonymous	100	2.22222	6.77431e-34
Accessory	artM_2	artM_2	0	2.22222	0.348837			Core SNP	c00948	group_201-synonymous	100	2.22222	6.77431e-34
Accessory	group_662	group_662	0	2.22222	0.348837			Core SNP	c00947	group_201-nonsynonymous (Y26F)	100	2.22222	6.77431e-34
Accessory	group_663	group_663	0	2.22222	0.348837			Core SNP	c00945	group_201-synonymous	100	2.22222	6.77431e-34
Accessory	group_664	group_664	0	2.22222	0.348837			Core SNP	c00944	group_201-synonymous	100	2.22222	6.77431e-34
Accessory	group_665	group_665	0	2.22222	0.348837			Core SNP	c00943	group_201-nonsynonymous (R2Q)	100	2.22222	6.77431e-34
Accessory	group_666	group_666	0	2.22222	0.348837			Core SNP	c00942	group_200-synonymous	100	2.22222	6.77431e-34
Accessory	ltrA	ltrA	0	2.22222	0.348837			Core SNP	c00941	group_200-synonymous	100	2.22222	6.77431e-34
Accessory	mnmG_2	mnmG_2	0	2.22222	0.348837			Core SNP	c00940	group_200-nonsynonymous (D1204E)	100	2.22222	6.77431e-34
Accessory	group_621	group_621	0	2.22222	0.348837			Core SNP	c00939	group_200-nonsynonymous (A1203T)	100	2.22222	6.77431e-34
Accessory	sepF	sepF	0	2.22222	0.348837			Core SNP	c00938	group_200-synonymous	100	2.22222	6.77431e-34
Accessory	group_643	group_643	0	2.22222	0.348837			Core SNP	c00937	group_200-synonymous	100	2.22222	6.77431e-34
Accessory	por_2	por_2	0	2.22222	0.348837			Core SNP	c00936	group_200-synonymous	100	2.22222	6.77431e-34
Accessory	group_624	group_624	0	2.22222	0.348837			Core SNP	c00935	group_200-synonymous	100	2.22222	6.77431e-34
Accessory	group_625	group_625	0	2.22222	0.348837			Core SNP	c00913	group_200-synonymous	100	2.22222	6.77431e-34
Accessory	group_626	group_626	0	2.22222	0.348837			Core SNP	c00912	group_200-synonymous	100	2.22222	6.77431e-34
Accessory	group_627	group_627	0	2.22222	0.348837			Core SNP	c00911	group_200-synonymous	100	2.22222	6.77431e-34
Accessory	fsaA	fsaA	0	2.22222	0.348837			Core SNP	c00910	group_200-synonymous	100	2.22222	6.77431e-34
Accessory	group_629	group_629	0	2.22222	0.348837			Core SNP	c00884	group_200-synonymous	100	2.22222	6.77431e-34
Accessory	group_630	group_630	0	2.22222	0.348837			Core SNP	c00883	group_200-synonymous	100	2.22222	6.77431e-34
Accessory	group_631	group_631	0	2.22222	0.348837			Core SNP	c00882	group_200-synonymous	100	2.22222	6.77431e-34
Accessory	group_632	group_632	0	2.22222	0.348837			Core SNP	c00881	group_200-synonymous	100	2.22222	6.77431e-34
Accessory	fldZ	fldZ	0	2.22222	0.348837			Core SNP	c00880	group_200-synonymous	100	2.22222	6.77431e-34
Accessory	group_634	group_634	0	2.22222	0.348837			Core SNP	c00879	group_200-synonymous	100	2.22222	6.77431e-34
Accessory	ilvC_2	ilvC_2	0	2.22222	0.348837			Core SNP	c00878	group_200-synonymous	100	2.22222	6.77431e-34
Accessory	rpoB_2	rpoB_2	0	2.22222	0.348837			Core SNP	c00877	group_200-synonymous	100	2.22222	6.77431e-34
Accessory	group_637	group_637	0	2.22222	0.348837			Core SNP	c00876	group_200-synonymous	100	2.22222	6.77431e-34
Accessory	group_638	group_638	0	2.22222	0.348837			Core SNP	c00875	group_200-synonymous	100	2.22222	6.77431e-34
Accessory	group_639	group_639	0	2.22222	0.348837			Core SNP	c00874	group_200-synonymous	100	2.22222	6.77431e-34
Accessory	group_64	group_64	0	2.22222	0.348837			Core SNP	c00873	group_200-synonymous	100	2.22222	6.77431e-34
Accessory	group_640	group_640	0	2.22222	0.348837			Core SNP	c00872	group_200-synonymous	100	2.22222	6.77431e-34
Accessory	group_641	group_641	0	2.22222	0.348837			Core SNP	c00871	group_200-synonymous	100	2.22222	6.77431e-34
Accessory	group_642	group_642	0	2.22222	0.348837			Core SNP	c00870	group_200-synonymous	100	2.22222	6.77431e-34
Accessory	group_644	group_644	0	2.22222	0.348837			Core SNP	c00869	group_200-synonymous	100	2.22222	6.77431e-34
Accessory	group_801	group_801	0	2.22222	0.348837			Core SNP	c00868	group_200-synonymous	100	2.22222	6.77431e-34
Accessory	group_904	group_904	0	2.22222	0.348837			Core SNP	c00867	group_200-synonymous	100	2.22222	6.77431e-34
Accessory	group_803	group_803	0	2.22222	0.348837			Core SNP	c00866	group_200-synonymous	100	2.22222	6.77431e-34
Accessory	group_928	group_928	0	2.22222	0.348837			Core SNP	c00885	group_200-synonymous	100	2.22222	6.77431e-34
Accessory	group_929	group_929	0	2.22222	0.348837			Core SNP	c00956	group_201-synonymous	100	2.22222	6.77431e-34
Accessory	group_930	group_930	0	2.22222	0.348837			Core SNP	c00886	group_200-synonymous	100	2.22222	6.77431e-34
Accessory	group_931	group_931	0	2.22222	0.348837			Core SNP	c00888	group_200-synonymous	100	2.22222	6.77431e-34
Accessory	group_932	group_932	0	2.22222	0.348837			Core SNP	c00909	group_200-synonymous	100	2.22222	6.77431e-34
Accessory	group_933	group_933	0	2.22222	0.348837			Core SNP	c00908	group_200-synonymous	100	2.22222	6.77431e-34
Accessory	group_934	group_934	0	2.22222	0.348837			Core SNP	c00907	group_200-synonymous	100	2.22222	6.77431e-34
Accessory	group_935	group_935	0	2.22222	0.348837			Core SNP	c00906	group_200-synonymous	100	2.22222	6.77431e-34
Accessory	group_936	group_936	0	2.22222	0.348837			Core SNP	c00905	group_200-synonymous	100	2.22222	6.77431e-34
Accessory	group_937	group_937	0	2.22222	0.348837			Core SNP	c00903	group_200-synonymous	100	2.22222	6.77431e-34
Accessory	group_938	group_938	0	2.22222	0.348837			Core SNP	c00902	group_200-synonymous	100	2.22222	6.77431e-34
Accessory	group_939	group_939	0	2.22222	0.348837			Core SNP	c00900	group_200-synonymous	100	2.22222	6.77431e-34
Accessory	group_940	group_940	0	2.22222	0.348837			Core SNP	c00899	group_200-synonymous	100	2.22222	6.77431e-34
Accessory	group_941	group_941	0	2.22222	0.348837			Core SNP	c00898	group_200-synonymous	100	2.22222	6.77431e-34
Accessory	group_942	group_942	0	2.22222	0.348837			Core SNP	c00897	group_200-synonymous	100	2.22222	6.77431e-34
Accessory	group_943	group_943	0	2.22222	0.348837			Core SNP	c00896	group_200-synonymous	100	2.22222	6.77431e-34
Accessory	group_944	group_944	0	2.22222	0.348837			Core SNP	c00895	group_200-synonymous	100	2.22222	6.77431e-34
Accessory	group_945	group_945	0	2.22222	0.348837			Core SNP	c00894	group_200-synonymous	100	2.22222	6.77431e-34
Accessory	group_946	group_946	0	2.22222	0.348837			Core SNP	c00893	group_200-synonymous	100	2.22222	6.77431e-34
Accessory	group_947	group_947	0	2.22222	0.348837			Core SNP	c00892	group_200-synonymous	100	2.22222	6.77431e-34
Accessory	group_948	group_948	0	2.22222	0.348837			Core SNP	c00891	group_200-synonymous	100	2.22222	6.77431e-34
Accessory	group_927	group_927	0	2.22222	0.348837			Core SNP	c00890	group_200-synonymous	100	2.22222	6.77431e-34
Accessory	group_949	group_949	0	2.22222	0.348837			Core SNP	c00889	group_200-synonymous	100	2.22222	6.77431e-34
Accessory	group_926	group_926	0	2.22222	0.348837			Core SNP	c00887	group_200-synonymous	100	2.22222	6.77431e-34
Accessory	group_924	group_924	0	2.22222	0.348837			Core SNP	c01110	group_207-synonymous	100	2.22222	6.77431e-34
Accessory	group_903	group_903	0	2.22222	0.348837			Core SNP	c01156	group_208-nonsynonymous (S153T)	100	2.22222	6.77431e-34
Accessory	group_574	group_574	0	2.22222	0.348837			Core SNP	c01112	group_207-synonymous	100	2.22222	6.77431e-34
Accessory	group_905	group_905	0	2.22222	0.348837			Core SNP	c01396	group_300-synonymous	100	2.22222	6.77431e-34
Accessory	group_906	group_906	0	2.22222	0.348837			Core SNP	c01395	group_300-synonymous	100	2.22222	6.77431e-34
Accessory	dnaN_2	dnaN_2	0	2.22222	0.348837			Core SNP	c01394	group_300-synonymous	100	2.22222	6.77431e-34
Accessory	smc	smc	0	2.22222	0.348837			Core SNP	c01393	group_300-synonymous	100	2.22222	6.77431e-34
Accessory	group_909	group_909	0	2.22222	0.348837			Core SNP	c01392	group_300-synonymous	100	2.22222	6.77431e-34
Accessory	group_910	group_910	0	2.22222	0.348837			Core SNP	c01391	group_299-synonymous	100	2.22222	6.77431e-34
Accessory	group_911	group_911	0	2.22222	0.348837			Core SNP	c01390	group_299-synonymous	100	2.22222	6.77431e-34
Accessory	group_912	group_912	0	2.22222	0.348837			Core SNP	c01389	group_299-synonymous	100	2.22222	6.77431e-34
Accessory	group_913	group_913	0	2.22222	0.348837			Core SNP	c01388	group_299-synonymous	100	2.22222	6.77431e-34
Accessory	group_914	group_914	0	2.22222	0.348837			Core SNP	c01387	group_299-synonymous	100	2.22222	6.77431e-34
Accessory	group_915	group_915	0	2.22222	0.348837			Core SNP	c01386	group_299-synonymous	100	2.22222	6.77431e-34
Accessory	group_916	group_916	0	2.22222	0.348837			Core SNP	c01385	group_299-synonymous	100	2.22222	6.77431e-34
Accessory	group_917	group_917	0	2.22222	0.348837			Core SNP	c01384	group_299-synonymous	100	2.22222	6.77431e-34
Accessory	group_918	group_918	0	2.22222	0.348837			Core SNP	c01383	group_299-synonymous	100	2.22222	6.77431e-34
Accessory	group_919	group_919	0	2.22222	0.348837			Core SNP	c01382	group_299-synonymous	100	2.22222	6.77431e-34
Accessory	group_920	group_920	0	2.22222	0.348837			Core SNP	c01381	group_299-synonymous	100	2.22222	6.77431e-34
Accessory	group_921	group_921	0	2.22222	0.348837			Core SNP	c01380	group_299-synonymous	100	2.22222	6.77431e-34
Accessory	group_922	group_922	0	2.22222	0.348837			Core SNP	c01397	group_300-nonsynonymous (S64T)	100	2.22222	6.77431e-34
Accessory	group_923	group_923	0	2.22222	0.348837			Core SNP	c01379	group_299-synonymous	100	2.22222	6.77431e-34
Accessory	group_925	group_925	0	2.22222	0.348837			Core SNP	c01398	group_300-synonymous	100	2.22222	6.77431e-34
Accessory	group_902	group_902	0	2.22222	0.348837			Core SNP	c01400	group_300-synonymous	100	2.22222	6.77431e-34
Accessory	tus	tus	0	2.22222	0.348837			Core SNP	c01418	group_301-nonsynonymous (N5S)	100	2.22222	6.77431e-34
Accessory	group_952	group_952	0	2.22222	0.348837			Core SNP	c01416	group_300-synonymous	100	2.22222	6.77431e-34
Accessory	group_977	group_977	0	2.22222	0.348837			Core SNP	c01415	group_300-synonymous	100	2.22222	6.77431e-34
Accessory	hns_2	hns_2	0	2.22222	0.348837			Core SNP	c01414	group_300-synonymous	100	2.22222	6.77431e-34
Accessory	group_979	group_979	0	2.22222	0.348837			Core SNP	c01413	group_300-synonymous	100	2.22222	6.77431e-34
Accessory	group_980	group_980	0	2.22222	0.348837			Core SNP	c01412	group_300-synonymous	100	2.22222	6.77431e-34
Accessory	group_981	group_981	0	2.22222	0.348837			Core SNP	c01411	group_300-synonymous	100	2.22222	6.77431e-34
Accessory	group_982	group_982	0	2.22222	0.348837			Core SNP	c01410	group_300-synonymous	100	2.22222	6.77431e-34
Accessory	group_983	group_983	0	2.22222	0.348837			Core SNP	c01409	group_300-synonymous	100	2.22222	6.77431e-34
Accessory	hin	hin	0	2.22222	0.348837			Core SNP	c01408	group_300-synonymous	100	2.22222	6.77431e-34
Accessory	group_985	group_985	0	2.22222	0.348837			Core SNP	c01407	group_300-synonymous	100	2.22222	6.77431e-34
Accessory	group_986	group_986	0	2.22222	0.348837			Core SNP	c01406	group_300-synonymous	100	2.22222	6.77431e-34
Accessory	aacA4	aacA4	0	2.22222	0.348837			Core SNP	c01405	group_300-synonymous	100	2.22222	6.77431e-34
Accessory	group_988	group_988	0	2.22222	0.348837			Core SNP	c01404	group_300-synonymous	100	2.22222	6.77431e-34
Accessory	bla	bla	0	2.22222	0.348837			Core SNP	c01403	group_300-synonymous	100	2.22222	6.77431e-34
Accessory	group_990	group_990	0	2.22222	0.348837			Core SNP	c01402	group_300-synonymous	100	2.22222	6.77431e-34
Accessory	hupA_2	hupA_2	0	2.22222	0.348837			Core SNP	c01401	group_300-synonymous	100	2.22222	6.77431e-34
Accessory	coaD_2	coaD_2	0	2.22222	0.348837			Core SNP	c01399	group_300-synonymous	100	2.22222	6.77431e-34
Accessory	group_993	group_993	0	2.22222	0.348837			Core SNP	c01378	group_299-synonymous	100	2.22222	6.77431e-34
Accessory	ftsH_2	ftsH_2	0	2.22222	0.348837			Core SNP	c01377	group_299-synonymous	100	2.22222	6.77431e-34
Accessory	group_995	group_995	0	2.22222	0.348837			Core SNP	c01376	group_299-synonymous	100	2.22222	6.77431e-34
Accessory	hns_3	hns_3	0	2.22222	0.348837			Core SNP	c01353	group_299-synonymous	100	2.22222	6.77431e-34
Accessory	group_997	group_997	0	2.22222	0.348837			Core SNP	c01352	group_299-synonymous	100	2.22222	6.77431e-34
Accessory	group_976	group_976	0	2.22222	0.348837			Core SNP	c01351	group_299-synonymous	100	2.22222	6.77431e-34
Accessory	pal_3	pal_3	0	2.22222	0.348837			Core SNP	c01350	group_299-synonymous	100	2.22222	6.77431e-34
Accessory	group_975	group_975	0	2.22222	0.348837			Core SNP	c01349	group_298-nonsynonymous (I235V)	100	2.22222	6.77431e-34
Accessory	imm	imm	0	2.22222	0.348837			Core SNP	c01348	group_298-synonymous	100	2.22222	6.77431e-34
Accessory	group_953	group_953	0	2.22222	0.348837			Core SNP	c01347	group_298-synonymous	100	2.22222	6.77431e-34
Accessory	group_954	group_954	0	2.22222	0.348837			Core SNP	c01346	group_298-synonymous	100	2.22222	6.77431e-34
Accessory	group_955	group_955	0	2.22222	0.348837			Core SNP	c01345	group_298-synonymous	100	2.22222	6.77431e-34
Accessory	group_956	group_956	0	2.22222	0.348837			Core SNP	c01344	group_298-nonsynonymous (T51A)	100	2.22222	6.77431e-34
Accessory	group_957	group_957	0	2.22222	0.348837			Core SNP	c01343	group_298-synonymous	100	2.22222	6.77431e-34
Accessory	group_958	group_958	0	2.22222	0.348837			Core SNP	c01342	group_298-synonymous	100	2.22222	6.77431e-34
Accessory	group_959	group_959	0	2.22222	0.348837			Core SNP	c01341	group_298-nonsynonymous (G12D)	100	2.22222	6.77431e-34
Accessory	mcpA_2	mcpA_2	0	2.22222	0.348837			Core SNP	c01340	group_298-synonymous	100	2.22222	6.77431e-34
Accessory	bdlA_3	bdlA_3	0	2.22222	0.348837			Core SNP	c01339	group_295-nonsynonymous (L104V)	100	2.22222	6.77431e-34
Accessory	group_962	group_962	0	2.22222	0.348837			Core SNP	c01338	group_295-synonymous	100	2.22222	6.77431e-34
Accessory	group_963	group_963	0	2.22222	0.348837			Core SNP	c01337	group_295-synonymous	100	2.22222	6.77431e-34
Accessory	group_964	group_964	0	2.22222	0.348837			Core SNP	c01354	group_299-nonsynonymous (S40N)	100	2.22222	6.77431e-34
Accessory	group_965	group_965	0	2.22222	0.348837			Core SNP	c01355	group_299-synonymous	100	2.22222	6.77431e-34
Accessory	group_966	group_966	0	2.22222	0.348837			Core SNP	c01356	group_299-nonsynonymous (N42S)	100	2.22222	6.77431e-34
Accessory	group_967	group_967	0	2.22222	0.348837			Core SNP	c01357	group_299-synonymous	100	2.22222	6.77431e-34
Accessory	group_968	group_968	0	2.22222	0.348837			Core SNP	c01375	group_299-synonymous	100	2.22222	6.77431e-34
Accessory	group_969	group_969	0	2.22222	0.348837			Core SNP	c01374	group_299-synonymous	100	2.22222	6.77431e-34
Accessory	group_97	group_97	0	2.22222	0.348837			Core SNP	c01373	group_299-nonsynonymous (A174V)	100	2.22222	6.77431e-34
Accessory	group_970	group_970	0	2.22222	0.348837			Core SNP	c01372	group_299-synonymous	100	2.22222	6.77431e-34
Accessory	group_971	group_971	0	2.22222	0.348837			Core SNP	c01371	group_299-synonymous	100	2.22222	6.77431e-34
Accessory	group_972	group_972	0	2.22222	0.348837			Core SNP	c01370	group_299-synonymous	100	2.22222	6.77431e-34
Accessory	group_974	group_974	0	2.22222	0.348837			Core SNP	c01369	group_299-synonymous	100	2.22222	6.77431e-34
Accessory	group_802	group_802	0	2.22222	0.348837			Core SNP	c01368	group_299-synonymous	100	2.22222	6.77431e-34
Accessory	group_901	group_901	0	2.22222	0.348837			Core SNP	c01419	group_307-synonymous	100	2.22222	6.77431e-34
Accessory	group_899	group_899	0	2.22222	0.348837			Core SNP	c01367	group_299-synonymous	100	2.22222	6.77431e-34
Accessory	group_828	group_828	0	2.22222	0.348837			Core SNP	c01365	group_299-synonymous	100	2.22222	6.77431e-34
Accessory	group_829	group_829	0	2.22222	0.348837			Core SNP	c01364	group_299-synonymous	100	2.22222	6.77431e-34
Accessory	group_830	group_830	0	2.22222	0.348837			Core SNP	c01363	group_299-synonymous	100	2.22222	6.77431e-34
Accessory	group_831	group_831	0	2.22222	0.348837			Core SNP	c01362	group_299-synonymous	100	2.22222	6.77431e-34
Accessory	group_832	group_832	0	2.22222	0.348837			Core SNP	c01361	group_299-synonymous	100	2.22222	6.77431e-34
Accessory	group_833	group_833	0	2.22222	0.348837			Core SNP	c01360	group_299-synonymous	100	2.22222	6.77431e-34
Accessory	group_834	group_834	0	2.22222	0.348837			Core SNP	c01359	group_299-synonymous	100	2.22222	6.77431e-34
Accessory	group_835	group_835	0	2.22222	0.348837			Core SNP	c01358	group_299-synonymous	100	2.22222	6.77431e-34
Accessory	group_836	group_836	0	2.22222	0.348837			Core SNP	c01366	group_299-synonymous	100	2.22222	6.77431e-34
Accessory	group_837	group_837	0	2.22222	0.348837			Core SNP	c01336	group_295-synonymous	100	2.22222	6.77431e-34
Accessory	group_838	group_838	0	2.22222	0.348837			Core SNP	c01420	group_307-synonymous	100	2.22222	6.77431e-34
Accessory	group_839	group_839	0	2.22222	0.348837			Core SNP	c01422	group_307-synonymous	100	2.22222	6.77431e-34
Accessory	group_840	group_840	0	2.22222	0.348837			Core SNP	c01482	group_307-synonymous	100	2.22222	6.77431e-34
Accessory	group_841	group_841	0	2.22222	0.348837			Core SNP	c01481	group_307-synonymous	100	2.22222	6.77431e-34
Accessory	group_842	group_842	0	2.22222	0.348837			Core SNP	c01480	group_307-synonymous	100	2.22222	6.77431e-34
Accessory	group_843	group_843	0	2.22222	0.348837			Core SNP	c01479	group_307-synonymous	100	2.22222	6.77431e-34
Accessory	group_844	group_844	0	2.22222	0.348837			Core SNP	c01478	group_307-synonymous	100	2.22222	6.77431e-34
Accessory	group_845	group_845	0	2.22222	0.348837			Core SNP	c01477	group_307-synonymous	100	2.22222	6.77431e-34
Accessory	group_846	group_846	0	2.22222	0.348837			Core SNP	c01476	group_307-synonymous	100	2.22222	6.77431e-34
Accessory	group_847	group_847	0	2.22222	0.348837			Core SNP	c01475	group_307-synonymous	100	2.22222	6.77431e-34
Accessory	group_848	group_848	0	2.22222	0.348837			Core SNP	c01474	group_307-synonymous	100	2.22222	6.77431e-34
Accessory	group_827	group_827	0	2.22222	0.348837			Core SNP	c01473	group_307-synonymous	100	2.22222	6.77431e-34
Accessory	group_849	group_849	0	2.22222	0.348837			Core SNP	c01472	group_307-synonymous	100	2.22222	6.77431e-34
Accessory	group_826	group_826	0	2.22222	0.348837			Core SNP	c01471	group_307-synonymous	100	2.22222	6.77431e-34
Accessory	group_824	group_824	0	2.22222	0.348837			Core SNP	c01470	group_307-synonymous	100	2.22222	6.77431e-34
Accessory	group_804	group_804	0	2.22222	0.348837			Core SNP	c01469	group_307-synonymous	100	2.22222	6.77431e-34
Accessory	group_805	group_805	0	2.22222	0.348837			Core SNP	c01468	group_307-synonymous	100	2.22222	6.77431e-34
Accessory	group_806	group_806	0	2.22222	0.348837			Core SNP	c01467	group_307-synonymous	100	2.22222	6.77431e-34
Accessory	group_807	group_807	0	2.22222	0.348837			Core SNP	c01466	group_307-synonymous	100	2.22222	6.77431e-34
Accessory	group_808	group_808	0	2.22222	0.348837			Core SNP	c01483	group_307-synonymous	100	2.22222	6.77431e-34
Accessory	group_809	group_809	0	2.22222	0.348837			Core SNP	c01465	group_307-synonymous	100	2.22222	6.77431e-34
Accessory	group_81	group_81	0	2.22222	0.348837			Core SNP	c01484	group_307-synonymous	100	2.22222	6.77431e-34
Accessory	uvrD_1	uvrD_1	0	2.22222	0.348837			Core SNP	c01486	group_307-synonymous	100	2.22222	6.77431e-34
Accessory	group_811	group_811	0	2.22222	0.348837			Core SNP	c01582	group_4475-nonsynonymous (R50L)	100	2.22222	6.77431e-34
Accessory	group_812	group_812	0	2.22222	0.348837			Core SNP	c01502	group_307-synonymous	100	2.22222	6.77431e-34
Accessory	group_813	group_813	0	2.22222	0.348837			Core SNP	c01501	group_307-synonymous	100	2.22222	6.77431e-34
Accessory	group_814	group_814	0	2.22222	0.348837			Core SNP	c01500	group_307-synonymous	100	2.22222	6.77431e-34
Accessory	group_815	group_815	0	2.22222	0.348837			Core SNP	c01499	group_307-synonymous	100	2.22222	6.77431e-34
Accessory	group_816	group_816	0	2.22222	0.348837			Core SNP	c01498	group_307-synonymous	100	2.22222	6.77431e-34
Accessory	group_817	group_817	0	2.22222	0.348837			Core SNP	c01497	group_307-synonymous	100	2.22222	6.77431e-34
Accessory	ihfA_2	ihfA_2	0	2.22222	0.348837			Core SNP	c01496	group_307-synonymous	100	2.22222	6.77431e-34
Accessory	dksA_2	dksA_2	0	2.22222	0.348837			Core SNP	c01495	group_307-synonymous	100	2.22222	6.77431e-34
Accessory	group_820	group_820	0	2.22222	0.348837			Core SNP	c01494	group_307-synonymous	100	2.22222	6.77431e-34
Accessory	group_821	group_821	0	2.22222	0.348837			Core SNP	c01493	group_307-synonymous	100	2.22222	6.77431e-34
Accessory	group_822	group_822	0	2.22222	0.348837			Core SNP	c01492	group_307-synonymous	100	2.22222	6.77431e-34
Accessory	group_823	group_823	0	2.22222	0.348837			Core SNP	c01491	group_307-synonymous	100	2.22222	6.77431e-34
Accessory	group_825	group_825	0	2.22222	0.348837			Core SNP	c01490	group_307-synonymous	100	2.22222	6.77431e-34
Accessory	yjcD	yjcD	0	2.22222	0.348837			Core SNP	c01489	group_307-synonymous	100	2.22222	6.77431e-34
Accessory	group_850	group_850	0	2.22222	0.348837			Core SNP	c01488	group_307-synonymous	100	2.22222	6.77431e-34
Accessory	group_852	group_852	0	2.22222	0.348837			Core SNP	c01487	group_307-synonymous	100	2.22222	6.77431e-34
Accessory	group_878	group_878	0	2.22222	0.348837			Core SNP	c01485	group_307-synonymous	100	2.22222	6.77431e-34
Accessory	group_879	group_879	0	2.22222	0.348837			Core SNP	c01464	group_307-synonymous	100	2.22222	6.77431e-34
Accessory	group_880	group_880	0	2.22222	0.348837			Core SNP	c01463	group_307-synonymous	100	2.22222	6.77431e-34
Accessory	group_881	group_881	0	2.22222	0.348837			Core SNP	c01462	group_307-synonymous	100	2.22222	6.77431e-34
Accessory	group_882	group_882	0	2.22222	0.348837			Core SNP	c01439	group_307-nonsynonymous (R223H)	100	2.22222	6.77431e-34
Accessory	group_883	group_883	0	2.22222	0.348837			Core SNP	c01438	group_307-synonymous	100	2.22222	6.77431e-34
Accessory	group_884	group_884	0	2.22222	0.348837			Core SNP	c01437	group_307-synonymous	100	2.22222	6.77431e-34
Accessory	group_885	group_885	0	2.22222	0.348837			Core SNP	c01436	group_307-synonymous	100	2.22222	6.77431e-34
Accessory	group_886	group_886	0	2.22222	0.348837			Core SNP	c01435	group_307-synonymous	100	2.22222	6.77431e-34
Accessory	group_887	group_887	0	2.22222	0.348837			Core SNP	c01434	group_307-synonymous	100	2.22222	6.77431e-34
Accessory	group_888	group_888	0	2.22222	0.348837			Core SNP	c01433	group_307-synonymous	100	2.22222	6.77431e-34
Accessory	group_889	group_889	0	2.22222	0.348837			Core SNP	c01432	group_307-synonymous	100	2.22222	6.77431e-34
Accessory	group_890	group_890	0	2.22222	0.348837			Core SNP	c01431	group_307-synonymous	100	2.22222	6.77431e-34
Accessory	group_891	group_891	0	2.22222	0.348837			Core SNP	c01430	group_307-nonsynonymous (Q120K)	100	2.22222	6.77431e-34
Accessory	group_892	group_892	0	2.22222	0.348837			Core SNP	c01429	group_307-synonymous	100	2.22222	6.77431e-34
Accessory	group_893	group_893	0	2.22222	0.348837			Core SNP	c01428	group_307-synonymous	100	2.22222	6.77431e-34
Accessory	group_894	group_894	0	2.22222	0.348837			Core SNP	c01427	group_307-synonymous	100	2.22222	6.77431e-34
Accessory	group_895	group_895	0	2.22222	0.348837			Core SNP	c01426	group_307-synonymous	100	2.22222	6.77431e-34
Accessory	group_896	group_896	0	2.22222	0.348837			Core SNP	c01425	group_307-synonymous	100	2.22222	6.77431e-34
Accessory	group_897	group_897	0	2.22222	0.348837			Core SNP	c01424	group_307-synonymous	100	2.22222	6.77431e-34
Accessory	group_898	group_898	0	2.22222	0.348837			Core SNP	c01423	group_307-synonymous	100	2.22222	6.77431e-34
Accessory	group_877	group_877	0	2.22222	0.348837			Core SNP	c01440	group_307-synonymous	100	2.22222	6.77431e-34
Accessory	lepB_2	lepB_2	0	2.22222	0.348837			Core SNP	c01441	group_307-synonymous	100	2.22222	6.77431e-34
Accessory	group_876	group_876	0	2.22222	0.348837			Core SNP	c01442	group_307-synonymous	100	2.22222	6.77431e-34
Accessory	group_874	group_874	0	2.22222	0.348837			Core SNP	c01443	group_307-synonymous	100	2.22222	6.77431e-34
Accessory	group_853	group_853	0	2.22222	0.348837			Core SNP	c01461	group_307-synonymous	100	2.22222	6.77431e-34
Accessory	ligA_3	ligA_3	0	2.22222	0.348837			Core SNP	c01460	group_307-synonymous	100	2.22222	6.77431e-34
Accessory	group_855	group_855	0	2.22222	0.348837			Core SNP	c01459	group_307-synonymous	100	2.22222	6.77431e-34
Accessory	group_856	group_856	0	2.22222	0.348837			Core SNP	c01458	group_307-synonymous	100	2.22222	6.77431e-34
Accessory	group_857	group_857	0	2.22222	0.348837			Core SNP	c01457	group_307-synonymous	100	2.22222	6.77431e-34
Accessory	group_858	group_858	0	2.22222	0.348837			Core SNP	c01456	group_307-synonymous	100	2.22222	6.77431e-34
Accessory	group_859	group_859	0	2.22222	0.348837			Core SNP	c01455	group_307-synonymous	100	2.22222	6.77431e-34
Accessory	group_860	group_860	0	2.22222	0.348837			Core SNP	c01454	group_307-synonymous	100	2.22222	6.77431e-34
Accessory	group_861	group_861	0	2.22222	0.348837			Core SNP	c01421	group_307-synonymous	100	2.22222	6.77431e-34
Accessory	group_862	group_862	0	2.22222	0.348837			Core SNP	c01453	group_307-synonymous	100	2.22222	6.77431e-34
Accessory	group_863	group_863	0	2.22222	0.348837			Core SNP	c01451	group_307-synonymous	100	2.22222	6.77431e-34
Accessory	group_864	group_864	0	2.22222	0.348837			Core SNP	c01450	group_307-synonymous	100	2.22222	6.77431e-34
Accessory	group_865	group_865	0	2.22222	0.348837			Core SNP	c01449	group_307-synonymous	100	2.22222	6.77431e-34
Accessory	group_866	group_866	0	2.22222	0.348837			Core SNP	c01448	group_307-synonymous	100	2.22222	6.77431e-34
Accessory	group_867	group_867	0	2.22222	0.348837			Core SNP	c01447	group_307-synonymous	100	2.22222	6.77431e-34
Accessory	group_868	group_868	0	2.22222	0.348837			Core SNP	c01446	group_307-synonymous	100	2.22222	6.77431e-34
Accessory	group_869	group_869	0	2.22222	0.348837			Core SNP	c01445	group_307-synonymous	100	2.22222	6.77431e-34
Accessory	group_870	group_870	0	2.22222	0.348837			Core SNP	c01444	group_307-synonymous	100	2.22222	6.77431e-34
Accessory	group_871	group_871	0	2.22222	0.348837			Core SNP	c01452	group_307-synonymous	100	2.22222	6.77431e-34
Accessory	group_872	group_872	0	2.22222	0.348837			Core SNP	c01111	group_207-synonymous	100	2.22222	6.77431e-34
Accessory	group_873	group_873	0	2.22222	0.348837			Core SNP	c01335	group_295-synonymous	100	2.22222	6.77431e-34
Accessory	group_875	group_875	0	2.22222	0.348837			Core SNP	c01333	group_295-synonymous	100	2.22222	6.77431e-34
Accessory	phnE	phnE	0	2.22222	0.348837			Core SNP	c01225	group_284-synonymous	100	2.22222	6.77431e-34
Accessory	ihfB_2	ihfB_2	0	2.22222	0.348837			Core SNP	c01224	group_284-synonymous	100	2.22222	6.77431e-34
Accessory	group_571	group_571	0	2.22222	0.348837			Core SNP	c01223	group_284-synonymous	100	2.22222	6.77431e-34
Accessory	recA_2	recA_2	0	2.22222	0.348837			Core SNP	c01222	group_284-synonymous	100	2.22222	6.77431e-34
Accessory	group_1026	group_1026	0	2.22222	0.348837			Core SNP	c01221	group_284-synonymous	100	2.22222	6.77431e-34
Accessory	group_1027	group_1027	0	2.22222	0.348837			Core SNP	c01220	group_284-synonymous	100	2.22222	6.77431e-34
Accessory	group_1028	group_1028	0	2.22222	0.348837			Core SNP	c01219	group_284-synonymous	100	2.22222	6.77431e-34
Accessory	group_1029	group_1029	0	2.22222	0.348837			Core SNP	c01218	group_284-nonsynonymous (M29L)	100	2.22222	6.77431e-34
Accessory	group_1030	group_1030	0	2.22222	0.348837			Core SNP	c01217	group_284-synonymous	100	2.22222	6.77431e-34
Accessory	group_1031	group_1031	0	2.22222	0.348837			Core SNP	c01216	group_284-nonsynonymous (E11D)	100	2.22222	6.77431e-34
Accessory	group_1032	group_1032	0	2.22222	0.348837			Core SNP	c01215	group_284-nonsynonymous (K4R)	100	2.22222	6.77431e-34
Accessory	group_1033	group_1033	0	2.22222	0.348837			Core SNP	c01214	group_274-synonymous	100	2.22222	6.77431e-34
Accessory	group_1034	group_1034	0	2.22222	0.348837			Core SNP	c01161	group_208-synonymous	100	2.22222	6.77431e-34
Accessory	traC_2	traC_2	0	2.22222	0.348837			Core SNP	c01160	group_208-synonymous	100	2.22222	6.77431e-34
Accessory	group_1036	group_1036	0	2.22222	0.348837			Core SNP	c01158	group_208-synonymous	100	2.22222	6.77431e-34
Accessory	group_1037	group_1037	0	2.22222	0.348837			Core SNP	c01157	group_208-synonymous	100	2.22222	6.77431e-34
Accessory	group_1024	group_1024	0	2.22222	0.348837			Core SNP	c00774	group_198-nonsynonymous (A128T)	100	2.22222	6.77431e-34
Accessory	group_1038	group_1038	0	2.22222	0.348837			Core SNP	c01226	group_284-synonymous	100	2.22222	6.77431e-34
Accessory	group_1040	group_1040	0	2.22222	0.348837			Core SNP	c01155	group_208-nonsynonymous (S153T)	100	2.22222	6.77431e-34
Accessory	group_1041	group_1041	0	2.22222	0.348837			Core SNP	c01227	group_284-synonymous	100	2.22222	6.77431e-34
Accessory	group_116	group_116	0	2.22222	0.348837			Core SNP	c01229	group_284-synonymous	100	2.22222	6.77431e-34
Accessory	group_1042	group_1042	0	2.22222	0.348837			Core SNP	c01247	group_285-synonymous	100	2.22222	6.77431e-34
Accessory	group_1043	group_1043	0	2.22222	0.348837			Core SNP	c01246	group_285-synonymous	100	2.22222	6.77431e-34
Accessory	group_1044	group_1044	0	2.22222	0.348837			Core SNP	c01245	group_285-synonymous	100	2.22222	6.77431e-34
Accessory	group_1045	group_1045	0	2.22222	0.348837			Core SNP	c01244	group_285-synonymous	100	2.22222	6.77431e-34
Accessory	group_1046	group_1046	0	2.22222	0.348837			Core SNP	c01243	group_285-synonymous	100	2.22222	6.77431e-34
Accessory	group_1047	group_1047	0	2.22222	0.348837			Core SNP	c01242	group_285-synonymous	100	2.22222	6.77431e-34
Accessory	group_1048	group_1048	0	2.22222	0.348837			Core SNP	c01241	group_285-synonymous	100	2.22222	6.77431e-34
Accessory	group_1049	group_1049	0	2.22222	0.348837			Core SNP	c01240	group_285-synonymous	100	2.22222	6.77431e-34
Accessory	group_1050	group_1050	0	2.22222	0.348837			Core SNP	c01239	group_285-synonymous	100	2.22222	6.77431e-34
Accessory	group_1051	group_1051	0	2.22222	0.348837			Core SNP	c01238	group_285-synonymous	100	2.22222	6.77431e-34
Accessory	group_1039	group_1039	0	2.22222	0.348837			Core SNP	c01237	group_285-synonymous	100	2.22222	6.77431e-34
Accessory	group_1052	group_1052	0	2.22222	0.348837			Core SNP	c01236	group_285-synonymous	100	2.22222	6.77431e-34
Accessory	xerC_4	xerC_4	0	2.22222	0.348837			Core SNP	c01235	group_285-synonymous	100	2.22222	6.77431e-34
Accessory	umuC_3	umuC_3	0	2.22222	0.348837			Core SNP	c01233	group_284-synonymous	100	2.22222	6.77431e-34
Accessory	group_444	group_444	0	2.22222	0.348837			Core SNP	c01232	group_284-synonymous	100	2.22222	6.77431e-34
Accessory	group_443	group_443	0	2.22222	0.348837			Core SNP	c01231	group_284-synonymous	100	2.22222	6.77431e-34
Accessory	group_442	group_442	0	2.22222	0.348837			Core SNP	c01230	group_284-synonymous	100	2.22222	6.77431e-34
Accessory	group_441	group_441	0	2.22222	0.348837			Core SNP	c01228	group_284-synonymous	100	2.22222	6.77431e-34
Accessory	group_440	group_440	0	2.22222	0.348837			Core SNP	c01154	group_208-nonsynonymous (M145V)	100	2.22222	6.77431e-34
Accessory	group_1087	group_1087	0	2.22222	0.348837			Core SNP	c01153	group_208-nonsynonymous (M145V)	100	2.22222	6.77431e-34
Accessory	group_26	group_26	0	2.22222	0.348837			Core SNP	c01152	group_208-synonymous	100	2.22222	6.77431e-34
Accessory	group_1000	group_1000	0	2.22222	0.348837			Core SNP	c01129	group_207-synonymous	100	2.22222	6.77431e-34
Accessory	group_1001	group_1001	0	2.22222	0.348837			Core SNP	c01128	group_207-synonymous	100	2.22222	6.77431e-34
Accessory	group_1002	group_1002	0	2.22222	0.348837			Core SNP	c01127	group_207-synonymous	100	2.22222	6.77431e-34
Accessory	group_1003	group_1003	0	2.22222	0.348837			Core SNP	c01126	group_207-synonymous	100	2.22222	6.77431e-34
Accessory	group_1004	group_1004	0	2.22222	0.348837			Core SNP	c01125	group_207-synonymous	100	2.22222	6.77431e-34
Accessory	group_1005	group_1005	0	2.22222	0.348837			Core SNP	c01124	group_207-synonymous	100	2.22222	6.77431e-34
Accessory	umuD_2	umuD_2	0	2.22222	0.348837			Core SNP	c01123	group_207-synonymous	100	2.22222	6.77431e-34
Accessory	group_1006	group_1006	0	2.22222	0.348837			Core SNP	c01122	group_207-synonymous	100	2.22222	6.77431e-34
Accessory	group_1008	group_1008	0	2.22222	0.348837			Core SNP	c01121	group_207-synonymous	100	2.22222	6.77431e-34
Accessory	group_1009	group_1009	0	2.22222	0.348837			Core SNP	c01120	group_207-nonsynonymous (L86Q)	100	2.22222	6.77431e-34
Accessory	group_1010	group_1010	0	2.22222	0.348837			Core SNP	c01119	group_207-synonymous	100	2.22222	6.77431e-34
Accessory	group_1011	group_1011	0	2.22222	0.348837			Core SNP	c01118	group_207-synonymous	100	2.22222	6.77431e-34
Accessory	group_1012	group_1012	0	2.22222	0.348837			Core SNP	c01117	group_207-synonymous	100	2.22222	6.77431e-34
Accessory	group_1013	group_1013	0	2.22222	0.348837			Core SNP	c01116	group_207-nonsynonymous (V65I)	100	2.22222	6.77431e-34
Accessory	group_1014	group_1014	0	2.22222	0.348837			Core SNP	c01115	group_207-synonymous	100	2.22222	6.77431e-34
Accessory	yceI_2	yceI_2	0	2.22222	0.348837			Core SNP	c01114	group_207-nonsynonymous (R59G)	100	2.22222	6.77431e-34
Accessory	yceJ_3	yceJ_3	0	2.22222	0.348837			Core SNP	c01113	group_207-nonsynonymous (I41L)	100	2.22222	6.77431e-34
Accessory	group_1017	group_1017	0	2.22222	0.348837			Core SNP	c01130	group_207-synonymous	100	2.22222	6.77431e-34
Accessory	group_1018	group_1018	0	2.22222	0.348837			Core SNP	c01131	group_207-synonymous	100	2.22222	6.77431e-34
Accessory	group_1019	group_1019	0	2.22222	0.348837			Core SNP	c01132	group_207-synonymous	100	2.22222	6.77431e-34
Accessory	group_1020	group_1020	0	2.22222	0.348837			Core SNP	c01133	group_207-synonymous	100	2.22222	6.77431e-34
Accessory	group_1007	group_1007	0	2.22222	0.348837			Core SNP	c01151	group_208-synonymous	100	2.22222	6.77431e-34
Accessory	group_445	group_445	0	2.22222	0.348837			Core SNP	c01150	group_208-synonymous	100	2.22222	6.77431e-34
Accessory	group_572	group_572	0	2.22222	0.348837			Core SNP	c01149	group_208-nonsynonymous (Y137N)	100	2.22222	6.77431e-34
Accessory	group_1054	group_1054	0	2.22222	0.348837			Core SNP	c01148	group_208-nonsynonymous (S126T)	100	2.22222	6.77431e-34
Accessory	group_1085	group_1085	0	2.22222	0.348837			Core SNP	c01147	group_208-nonsynonymous (Y125H)	100	2.22222	6.77431e-34
Accessory	group_1114	group_1114	0	2.22222	0.348837			Core SNP	c01146	group_208-synonymous	100	2.22222	6.77431e-34
Accessory	folP_3	folP_3	0	2.22222	0.348837			Core SNP	c01145	group_208-nonsynonymous (H90Y)	100	2.22222	6.77431e-34
Accessory	group_1112	group_1112	0	2.22222	0.348837			Core SNP	c01144	group_208-synonymous	100	2.22222	6.77431e-34
Accessory	group_1111	group_1111	0	2.22222	0.348837			Core SNP	c01248	group_285-synonymous	100	2.22222	6.77431e-34
Accessory	group_1110	group_1110	0	2.22222	0.348837			Core SNP	c01143	group_208-synonymous	100	2.22222	6.77431e-34
Accessory	group_1109	group_1109	0	2.22222	0.348837			Core SNP	c01141	group_208-synonymous	100	2.22222	6.77431e-34
Accessory	group_1108	group_1108	0	2.22222	0.348837			Core SNP	c01140	group_208-synonymous	100	2.22222	6.77431e-34
Accessory	group_1107	group_1107	0	2.22222	0.348837			Core SNP	c01139	group_208-nonsynonymous (F57L)	100	2.22222	6.77431e-34
Accessory	group_1106	group_1106	0	2.22222	0.348837			Core SNP	c01138	group_208-nonsynonymous (G33R)	100	2.22222	6.77431e-34
Accessory	group_1105	group_1105	0	2.22222	0.348837			Core SNP	c01137	group_207-synonymous	100	2.22222	6.77431e-34
Accessory	group_1104	group_1104	0	2.22222	0.348837			Core SNP	c01136	group_207-synonymous	100	2.22222	6.77431e-34
Accessory	group_1103	group_1103	0	2.22222	0.348837			Core SNP	c01135	group_207-nonsynonymous (M192L)	100	2.22222	6.77431e-34
Accessory	group_1117	group_1117	0	2.22222	0.348837			Core SNP	c01134	group_207-synonymous	100	2.22222	6.77431e-34
Accessory	group_1102	group_1102	0	2.22222	0.348837			Core SNP	c01142	group_208-synonymous	100	2.22222	6.77431e-34
Accessory	per1	per1	0	2.22222	0.348837			Core SNP	c01334	group_295-synonymous	100	2.22222	6.77431e-34
Accessory	group_1099	group_1099	0	2.22222	0.348837			Core SNP	c01249	group_285-synonymous	100	2.22222	6.77431e-34
Accessory	ygiC	ygiC	0	2.22222	0.348837			Core SNP	c01251	group_285-synonymous	100	2.22222	6.77431e-34
Accessory	group_1097	group_1097	0	2.22222	0.348837			Core SNP	c01311	group_294-synonymous	100	2.22222	6.77431e-34
Accessory	group_1096	group_1096	0	2.22222	0.348837			Core SNP	c01310	group_294-synonymous	100	2.22222	6.77431e-34
Accessory	group_1095	group_1095	0	2.22222	0.348837			Core SNP	c01309	group_294-synonymous	100	2.22222	6.77431e-34
Accessory	group_1094	group_1094	0	2.22222	0.348837			Core SNP	c01308	group_294-synonymous	100	2.22222	6.77431e-34
Accessory	group_1093	group_1093	0	2.22222	0.348837			Core SNP	c01307	group_294-synonymous	100	2.22222	6.77431e-34
Accessory	group_1092	group_1092	0	2.22222	0.348837			Core SNP	c01306	group_294-nonsynonymous (D29E)	100	2.22222	6.77431e-34
Accessory	dam_2	dam_2	0	2.22222	0.348837			Core SNP	c01305	group_294-synonymous	100	2.22222	6.77431e-34
Accessory	group_1090	group_1090	0	2.22222	0.348837			Core SNP	c01304	group_294-nonsynonymous (S21G)	100	2.22222	6.77431e-34
Accessory	group_1089	group_1089	0	2.22222	0.348837			Core SNP	c01303	group_294-nonsynonymous (R12L)	100	2.22222	6.77431e-34
Accessory	srpC_2	srpC_2	0	2.22222	0.348837			Core SNP	c01302	group_290-nonsynonymous (T235A)	100	2.22222	6.77431e-34
Accessory	group_1101	group_1101	0	2.22222	0.348837			Core SNP	c01301	group_290-synonymous	100	2.22222	6.77431e-34
Accessory	group_1053	group_1053	0	2.22222	0.348837			Core SNP	c01300	group_290-synonymous	100	2.22222	6.77431e-34
Accessory	tap	tap	0	2.22222	0.348837			Core SNP	c01299	group_290-synonymous	100	2.22222	6.77431e-34
Accessory	group_1082	group_1082	0	2.22222	0.348837			Core SNP	c01298	group_290-synonymous	100	2.22222	6.77431e-34
Accessory	group_1055	group_1055	0	2.22222	0.348837			Core SNP	c01297	group_290-synonymous	100	2.22222	6.77431e-34
Accessory	group_1056	group_1056	0	2.22222	0.348837			Core SNP	c01296	group_290-synonymous	100	2.22222	6.77431e-34
Accessory	group_1057	group_1057	0	2.22222	0.348837			Core SNP	c01295	group_290-synonymous	100	2.22222	6.77431e-34
Accessory	group_1058	group_1058	0	2.22222	0.348837			Core SNP	c01312	group_294-synonymous	100	2.22222	6.77431e-34
Accessory	group_1059	group_1059	0	2.22222	0.348837			Core SNP	c01294	group_290-synonymous	100	2.22222	6.77431e-34
Accessory	group_106	group_106	0	2.22222	0.348837			Core SNP	c01313	group_294-synonymous	100	2.22222	6.77431e-34
Accessory	group_1060	group_1060	0	2.22222	0.348837			Core SNP	c01315	group_294-synonymous	100	2.22222	6.77431e-34
Accessory	group_1061	group_1061	0	2.22222	0.348837			Core SNP	c01332	group_294-synonymous	100	2.22222	6.77431e-34
Accessory	group_1062	group_1062	0	2.22222	0.348837			Core SNP	c01331	group_294-synonymous	100	2.22222	6.77431e-34
Accessory	group_1063	group_1063	0	2.22222	0.348837			Core SNP	c01330	group_294-synonymous	100	2.22222	6.77431e-34
Accessory	group_1064	group_1064	0	2.22222	0.348837			Core SNP	c01329	group_294-synonymous	100	2.22222	6.77431e-34
Accessory	group_1065	group_1065	0	2.22222	0.348837			Core SNP	c01328	group_294-nonsynonymous (I243F)	100	2.22222	6.77431e-34
Accessory	group_1066	group_1066	0	2.22222	0.348837			Core SNP	c01327	group_294-synonymous	100	2.22222	6.77431e-34
Accessory	group_1083	group_1083	0	2.22222	0.348837			Core SNP	c01326	group_294-synonymous	100	2.22222	6.77431e-34
Accessory	group_1067	group_1067	0	2.22222	0.348837			Core SNP	c01325	group_294-synonymous	100	2.22222	6.77431e-34
Accessory	pdeB	pdeB	0	2.22222	0.348837			Core SNP	c01324	group_294-synonymous	100	2.22222	6.77431e-34
Accessory	group_1070	group_1070	0	2.22222	0.348837			Core SNP	c01323	group_294-synonymous	100	2.22222	6.77431e-34
Accessory	group_1071	group_1071	0	2.22222	0.348837			Core SNP	c01322	group_294-synonymous	100	2.22222	6.77431e-34
Accessory	group_1072	group_1072	0	2.22222	0.348837			Core SNP	c01321	group_294-synonymous	100	2.22222	6.77431e-34
Accessory	merR	merR	0	2.22222	0.348837			Core SNP	c01320	group_294-synonymous	100	2.22222	6.77431e-34
Accessory	merT	merT	0	2.22222	0.348837			Core SNP	c01319	group_294-synonymous	100	2.22222	6.77431e-34
Accessory	merP	merP	0	2.22222	0.348837			Core SNP	c01318	group_294-synonymous	100	2.22222	6.77431e-34
Accessory	merC	merC	0	2.22222	0.348837			Core SNP	c01317	group_294-synonymous	100	2.22222	6.77431e-34
Accessory	merA	merA	0	2.22222	0.348837			Core SNP	c01316	group_294-synonymous	100	2.22222	6.77431e-34
Accessory	group_1078	group_1078	0	2.22222	0.348837			Core SNP	c01314	group_294-nonsynonymous (N65S)	100	2.22222	6.77431e-34
Accessory	group_1079	group_1079	0	2.22222	0.348837			Core SNP	c01293	group_290-synonymous	100	2.22222	6.77431e-34
Accessory	group_1080	group_1080	0	2.22222	0.348837			Core SNP	c01292	group_290-synonymous	100	2.22222	6.77431e-34
Accessory	group_1081	group_1081	0	2.22222	0.348837			Core SNP	c01291	group_290-synonymous	100	2.22222	6.77431e-34
Accessory	group_1068	group_1068	0	2.22222	0.348837			Core SNP	c01268	group_286-synonymous	100	2.22222	6.77431e-34
Accessory	group_446	group_446	0	2.22222	0.348837			Core SNP	c01267	group_286-synonymous	100	2.22222	6.77431e-34
Accessory	group_43	group_43	0	2.22222	0.348837			Core SNP	c01266	group_286-synonymous	100	2.22222	6.77431e-34
Accessory	group_448	group_448	0	2.22222	0.348837			Core SNP	c01265	group_286-synonymous	100	2.22222	6.77431e-34
Accessory	group_533	group_533	0	2.22222	0.348837			Core SNP	c01264	group_286-synonymous	100	2.22222	6.77431e-34
Accessory	group_532	group_532	0	2.22222	0.348837			Core SNP	c01263	group_286-synonymous	100	2.22222	6.77431e-34
Accessory	group_531	group_531	0	2.22222	0.348837			Core SNP	c01262	group_286-nonsynonymous (Q74H)	100	2.22222	6.77431e-34
Accessory	group_530	group_530	0	2.22222	0.348837			Core SNP	c01261	group_286-synonymous	100	2.22222	6.77431e-34
Accessory	flhB_2	flhB_2	0	2.22222	0.348837			Core SNP	c01260	group_286-synonymous	100	2.22222	6.77431e-34
Accessory	group_529	group_529	0	2.22222	0.348837			Core SNP	c01259	group_286-synonymous	100	2.22222	6.77431e-34
Accessory	group_528	group_528	0	2.22222	0.348837			Core SNP	c01258	group_286-synonymous	100	2.22222	6.77431e-34
Accessory	group_527	group_527	0	2.22222	0.348837			Core SNP	c01257	group_286-synonymous	100	2.22222	6.77431e-34
Accessory	group_526	group_526	0	2.22222	0.348837			Core SNP	c01256	group_286-synonymous	100	2.22222	6.77431e-34
Accessory	group_525	group_525	0	2.22222	0.348837			Core SNP	c01255	group_286-nonsynonymous (Q30K)	100	2.22222	6.77431e-34
Accessory	group_524	group_524	0	2.22222	0.348837			Core SNP	c01254	group_285-synonymous	100	2.22222	6.77431e-34
Accessory	group_523	group_523	0	2.22222	0.348837			Core SNP	c01253	group_285-synonymous	100	2.22222	6.77431e-34
Accessory	group_522	group_522	0	2.22222	0.348837			Core SNP	c01252	group_285-synonymous	100	2.22222	6.77431e-34
Accessory	group_521	group_521	0	2.22222	0.348837			Core SNP	c01269	group_286-synonymous	100	2.22222	6.77431e-34
Accessory	group_520	group_520	0	2.22222	0.348837			Core SNP	c01270	group_286-synonymous	100	2.22222	6.77431e-34
Accessory	recD2	recD2	0	2.22222	0.348837			Core SNP	c01271	group_286-synonymous	100	2.22222	6.77431e-34
Accessory	traD	traD	0	2.22222	0.348837			Core SNP	c01272	group_286-synonymous	100	2.22222	6.77431e-34
Accessory	group_504	group_504	0	2.22222	0.348837			Core SNP	c01290	group_288-synonymous	100	2.22222	6.77431e-34
Accessory	group_505	group_505	0	2.22222	0.348837			Core SNP	c01289	group_288-nonsynonymous (E324D)	100	2.22222	6.77431e-34
Accessory	group_506	group_506	0	2.22222	0.348837			Core SNP	c01288	group_288-synonymous	100	2.22222	6.77431e-34
Accessory	group_507	group_507	0	2.22222	0.348837			Core SNP	c01287	group_288-synonymous	100	2.22222	6.77431e-34
Accessory	group_508	group_508	0	2.22222	0.348837			Core SNP	c01286	group_288-synonymous	100	2.22222	6.77431e-34
Accessory	group_509	group_509	0	2.22222	0.348837			Core SNP	c01285	group_288-synonymous	100	2.22222	6.77431e-34
Accessory	group_534	group_534	0	2.22222	0.348837			Core SNP	c01284	group_288-synonymous	100	2.22222	6.77431e-34
Accessory	group_510	group_510	0	2.22222	0.348837			Core SNP	c01283	group_288-synonymous	100	2.22222	6.77431e-34
Accessory	group_512	group_512	0	2.22222	0.348837			Core SNP	c01250	group_285-synonymous	100	2.22222	6.77431e-34
Accessory	group_513	group_513	0	2.22222	0.348837			Core SNP	c01282	group_288-synonymous	100	2.22222	6.77431e-34
Accessory	group_514	group_514	0	2.22222	0.348837			Core SNP	c01280	group_288-synonymous	100	2.22222	6.77431e-34
Accessory	group_515	group_515	0	2.22222	0.348837			Core SNP	c01279	group_288-synonymous	100	2.22222	6.77431e-34
Accessory	group_516	group_516	0	2.22222	0.348837			Core SNP	c01278	group_288-synonymous	100	2.22222	6.77431e-34
Accessory	group_517	group_517	0	2.22222	0.348837			Core SNP	c01277	group_288-synonymous	100	2.22222	6.77431e-34
Accessory	group_511	group_511	0	2.22222	0.348837			Core SNP	c01276	group_288-synonymous	100	2.22222	6.77431e-34
Accessory	vapC	vapC	0	2.22222	0.348837			Core SNP	c01275	group_288-nonsynonymous (F48L)	100	2.22222	6.77431e-34
Accessory	group_535	group_535	0	2.22222	0.348837			Core SNP	c01274	group_288-synonymous	100	2.22222	6.77431e-34
Accessory	group_537	group_537	0	2.22222	0.348837			Core SNP	c01273	group_288-synonymous	100	2.22222	6.77431e-34
Accessory	group_570	group_570	0	2.22222	0.348837			Core SNP	c01281	group_288-synonymous	100	2.22222	6.77431e-34
Accessory	group_569	group_569	0	2.22222	0.348837			Core SNP	c00773	group_198-nonsynonymous (S125G)	100	2.22222	6.77431e-34
Accessory	group_567	group_567	0	2.22222	0.348837			Core SNP	c00901	group_200-synonymous	100	2.22222	6.77431e-34
Accessory	group_566	group_566	0	2.22222	0.348837			Core SNP	c00771	group_198-nonsynonymous (P120A)	100	2.22222	6.77431e-34
Accessory	group_565	group_565	0	2.22222	0.348837			Core SNP	c02341	traC-synonymous	100	2.22222	6.77431e-34
Accessory	group_564	group_564	0	2.22222	0.348837			Core SNP	c02342	traC-synonymous	100	2.22222	6.77431e-34
Accessory	group_562	group_562	0	2.22222	0.348837			Core SNP	c02286	traC-nonsynonymous (G340T)	100	2.22222	6.77431e-34
Accessory	group_561	group_561	0	2.22222	0.348837			Core SNP	c02285	traC-synonymous	100	2.22222	6.77431e-34
Accessory	group_560	group_560	0	2.22222	0.348837			Core SNP	c02284	traC-synonymous	100	2.22222	6.77431e-34
Accessory	group_559	group_559	0	2.22222	0.348837			Core SNP	c02283	traC-synonymous	100	2.22222	6.77431e-34
Accessory	group_558	group_558	0	2.22222	0.348837			Core SNP	c02282	traC-synonymous	100	2.22222	6.77431e-34
Accessory	group_557	group_557	0	2.22222	0.348837			Core SNP	c02281	traC-synonymous	100	2.22222	6.77431e-34
Accessory	group_556	group_556	0	2.22222	0.348837			Core SNP	c02287	traC-synonymous	100	2.22222	6.77431e-34
Accessory	group_555	group_555	0	2.22222	0.348837			Core SNP	c02280	traC-synonymous	100	2.22222	6.77431e-34
Accessory	group_554	group_554	0	2.22222	0.348837			Core SNP	c02278	traC-synonymous	100	2.22222	6.77431e-34
Accessory	group_553	group_553	0	2.22222	0.348837			Core SNP	c02277	traC-synonymous	100	2.22222	6.77431e-34
Accessory	group_552	group_552	0	2.22222	0.348837			Core SNP	c02276	traC-synonymous	100	2.22222	6.77431e-34
Accessory	group_538	group_538	0	2.22222	0.348837			Core SNP	c02275	traC-synonymous	100	2.22222	6.77431e-34
Accessory	group_539	group_539	0	2.22222	0.348837			Core SNP	c02274	traC-synonymous	100	2.22222	6.77431e-34
Accessory	group_540	group_540	0	2.22222	0.348837			Core SNP	c02273	traC-synonymous	100	2.22222	6.77431e-34
Accessory	group_541	group_541	0	2.22222	0.348837			Core SNP	c02272	traC-synonymous	100	2.22222	6.77431e-34
Accessory	group_542	group_542	0	2.22222	0.348837			Core SNP	c02271	traC-synonymous	100	2.22222	6.77431e-34
Accessory	group_543	group_543	0	2.22222	0.348837			Core SNP	c02279	traC-synonymous	100	2.22222	6.77431e-34
Accessory	group_536	group_536	0	2.22222	0.348837			Core SNP	c02340	traC-synonymous	100	2.22222	6.77431e-34
Accessory	group_544	group_544	0	2.22222	0.348837			Core SNP	c02339	traC-synonymous	100	2.22222	6.77431e-34
Accessory	group_546	group_546	0	2.22222	0.348837			Core SNP	c02338	traC-synonymous	100	2.22222	6.77431e-34
Accessory	traC_1	traC_1	0	2.22222	0.348837			Core SNP	c02293	traC-synonymous	100	2.22222	6.77431e-34
Accessory	group_548	group_548	0	2.22222	0.348837			Core SNP	c02292	traC-synonymous	100	2.22222	6.77431e-34
Accessory	group_549	group_549	0	2.22222	0.348837			Core SNP	c02291	traC-synonymous	100	2.22222	6.77431e-34
Accessory	group_550	group_550	0	2.22222	0.348837			Core SNP	c02290	traC-synonymous	100	2.22222	6.77431e-34
Accessory	group_551	group_551	0	2.22222	0.348837			Core SNP	c02289	traC-synonymous	100	2.22222	6.77431e-34
Accessory	group_545	group_545	0	2.22222	0.348837			Core SNP	c02288	traC-nonsynonymous (A352T)	100	2.22222	6.77431e-34
Accessory	group_502	group_502	0	2.22222	0.348837			Core SNP	c02325	traC-synonymous	100	2.22222	6.77431e-34
Accessory	group_503	group_503	0	2.22222	0.348837			Core SNP	c02326	traC-synonymous	100	2.22222	6.77431e-34
Accessory	group_500	group_500	0	2.22222	0.348837			Core SNP	c02327	traC-synonymous	100	2.22222	6.77431e-34
Accessory	group_472	group_472	0	2.22222	0.348837			Core SNP	c02328	traC-synonymous	100	2.22222	6.77431e-34
Accessory	group_471	group_471	0	2.22222	0.348837			Core SNP	c02329	traC-synonymous	100	2.22222	6.77431e-34
Accessory	group_470	group_470	0	2.22222	0.348837			Core SNP	c02330	traC-synonymous	100	2.22222	6.77431e-34
Accessory	group_469	group_469	0	2.22222	0.348837			Core SNP	c02331	traC-synonymous	100	2.22222	6.77431e-34
Accessory	group_468	group_468	0	2.22222	0.348837			Core SNP	c02332	traC-synonymous	100	2.22222	6.77431e-34
Accessory	group_501	group_501	0	2.22222	0.348837			Core SNP	c02333	traC-synonymous	100	2.22222	6.77431e-34
Accessory	group_466	group_466	0	2.22222	0.348837			Core SNP	c02334	traC-synonymous	100	2.22222	6.77431e-34
Accessory	group_465	group_465	0	2.22222	0.348837			Core SNP	c02335	traC-synonymous	100	2.22222	6.77431e-34
Accessory	group_464	group_464	0	2.22222	0.348837			Core SNP	c02336	traC-synonymous	100	2.22222	6.77431e-34
Accessory	group_463	group_463	0	2.22222	0.348837			Core SNP	c02337	traC-synonymous	100	2.22222	6.77431e-34
Accessory	group_462	group_462	0	2.22222	0.348837			Core SNP	c02270	traC-synonymous	100	2.22222	6.77431e-34
Accessory	soj_3	soj_3	0	2.22222	0.348837			Core SNP	c02269	traC-nonsynonymous (I198V)	100	2.22222	6.77431e-34
Accessory	group_461	group_461	0	2.22222	0.348837			Core SNP	c02268	traC-synonymous	100	2.22222	6.77431e-34
Accessory	group_459	group_459	0	2.22222	0.348837			Core SNP	c02267	traC-synonymous	100	2.22222	6.77431e-34
Accessory	group_458	group_458	0	2.22222	0.348837			Core SNP	c00331	dinG_2-synonymous	100	2.22222	6.77431e-34
Accessory	group_457	group_457	0	2.22222	0.348837			Core SNP	c00330	dinG_2-synonymous	100	2.22222	6.77431e-34
Accessory	group_456	group_456	0	2.22222	0.348837			Core SNP	c00329	dinG_2-nonsynonymous (L157F)	100	2.22222	6.77431e-34
Accessory	group_455	group_455	0	2.22222	0.348837			Core SNP	c00328	dinG_2-synonymous	100	2.22222	6.77431e-34
Accessory	group_454	group_454	0	2.22222	0.348837			Core SNP	c00327	dinG_2-synonymous	100	2.22222	6.77431e-34
Accessory	group_453	group_453	0	2.22222	0.348837			Core SNP	c00326	dinG_2-nonsynonymous (L127M)	100	2.22222	6.77431e-34
Accessory	group_452	group_452	0	2.22222	0.348837			Core SNP	c00325	dinG_2-nonsynonymous (S126A)	100	2.22222	6.77431e-34
Accessory	group_451	group_451	0	2.22222	0.348837			Core SNP	c00324	dinG_2-nonsynonymous (H122R)	100	2.22222	6.77431e-34
Accessory	group_450	group_450	0	2.22222	0.348837			Core SNP	c00323	dinG_2-nonsynonymous (M117I)	100	2.22222	6.77431e-34
Accessory	group_449	group_449	0	2.22222	0.348837			Core SNP	c00322	dinG_2-nonsynonymous (D116E)	100	2.22222	6.77431e-34
Accessory	group_460	group_460	0	2.22222	0.348837			Core SNP	c00321	dinG_2-synonymous	100	2.22222	6.77431e-34
Accessory	noc	noc	0	2.22222	0.348837			Core SNP	c00320	dinG_2-synonymous	100	2.22222	6.77431e-34
Accessory	group_467	group_467	0	2.22222	0.348837			Core SNP	c00319	dinG_2-synonymous	100	2.22222	6.77431e-34
Accessory	group_476	group_476	0	2.22222	0.348837			Core SNP	c00318	dinG_2-synonymous	100	2.22222	6.77431e-34
Accessory	group_499	group_499	0	2.22222	0.348837			Core SNP	c00317	dinG_2-nonsynonymous (E65D)	100	2.22222	6.77431e-34
Accessory	group_498	group_498	0	2.22222	0.348837			Core SNP	c00316	dinG_2-synonymous	100	2.22222	6.77431e-34
Accessory	group_497	group_497	0	2.22222	0.348837			Core SNP	c00315	dinG_2-synonymous	100	2.22222	6.77431e-34
Accessory	group_496	group_496	0	2.22222	0.348837			Core SNP	c00314	dinG_2-nonsynonymous (S37T)	100	2.22222	6.77431e-34
Accessory	group_495	group_495	0	2.22222	0.348837			Core SNP	c00313	dinG_2-synonymous	100	2.22222	6.77431e-34
Accessory	group_494	group_494	0	2.22222	0.348837			Core SNP	c00332	dinG_2-synonymous	100	2.22222	6.77431e-34
Accessory	group_475	group_475	0	2.22222	0.348837			Core SNP	c02294	traC-synonymous	100	2.22222	6.77431e-34
Accessory	group_493	group_493	0	2.22222	0.348837			Core SNP	c00333	dinG_2-synonymous	100	2.22222	6.77431e-34
Accessory	group_492	group_492	0	2.22222	0.348837			Core SNP	c00335	dinG_2-synonymous	100	2.22222	6.77431e-34
Accessory	group_491	group_491	0	2.22222	0.348837			Core SNP	c02266	traC-nonsynonymous (I180L)	100	2.22222	6.77431e-34
Accessory	group_490	group_490	0	2.22222	0.348837			Core SNP	c00354	dsbC_2-synonymous	100	2.22222	6.77431e-34
Accessory	group_49	group_49	0	2.22222	0.348837			Core SNP	c00353	dsbC_2-synonymous	100	2.22222	6.77431e-34
Accessory	group_1086	group_1086	0	2.22222	0.348837			Core SNP	c00352	dsbC_2-synonymous	100	2.22222	6.77431e-34
Accessory	group_488	group_488	0	2.22222	0.348837			Core SNP	c00351	dsbC_2-synonymous	100	2.22222	6.77431e-34
Accessory	group_487	group_487	0	2.22222	0.348837			Core SNP	c00350	dsbC_2-synonymous	100	2.22222	6.77431e-34
Accessory	group_486	group_486	0	2.22222	0.348837			Core SNP	c00349	dsbC_2-synonymous	100	2.22222	6.77431e-34
Accessory	group_485	group_485	0	2.22222	0.348837			Core SNP	c00348	dsbC_2-synonymous	100	2.22222	6.77431e-34
Accessory	group_484	group_484	0	2.22222	0.348837			Core SNP	c00347	dsbC_2-synonymous	100	2.22222	6.77431e-34
Accessory	group_998	group_998	0	2.22222	0.348837			Core SNP	c00346	dsbC_2-synonymous	100	2.22222	6.77431e-34
Accessory	group_478	group_478	0	2.22222	0.348837			Core SNP	c00345	dsbC_2-synonymous	100	2.22222	6.77431e-34
Accessory	group_483	group_483	0	2.22222	0.348837			Core SNP	c00344	dsbC_2-synonymous	100	2.22222	6.77431e-34
Accessory	group_479	group_479	0	2.22222	0.348837			Core SNP	c00343	dsbC_2-synonymous	100	2.22222	6.77431e-34
Accessory	group_480	group_480	0	2.22222	0.348837			Core SNP	c00342	dsbC_2-synonymous	100	2.22222	6.77431e-34
Accessory	group_481	group_481	0	2.22222	0.348837			Core SNP	c00341	dsbC_2-nonsynonymous (P21S)	100	2.22222	6.77431e-34
Accessory	group_482	group_482	0	2.22222	0.348837			Core SNP	c00339	dinG_2-synonymous	100	2.22222	6.77431e-34
Accessory	group_489	group_489	0	2.22222	0.348837			Core SNP	c00338	dinG_2-synonymous	100	2.22222	6.77431e-34
Accessory	luxR_2	luxR_2	22.619	15.5556	0.369376			Core SNP	c00337	dinG_2-synonymous	100	2.22222	6.77431e-34
Accessory	group_113	group_113	77.381	84.4444	0.369376			Core SNP	c00336	dinG_2-synonymous	100	2.22222	6.77431e-34
Accessory	group_4371	group_4371	10.7143	15.5556	0.418005			Core SNP	c00334	dinG_2-synonymous	100	2.22222	6.77431e-34
Accessory	group_4313	group_4313	34.5238	26.6667	0.429794			Core SNP	c00312	dinG_2-synonymous	100	2.22222	6.77431e-34
Accessory	rpoS_1	rpoS_1	9.52381	4.44444	0.492351			Core SNP	c02295	traC-synonymous	100	2.22222	6.77431e-34
Accessory	hcpA_1	hcpA_1	91.6667	95.5556	0.494069			Core SNP	c02297	traC-synonymous	100	2.22222	6.77431e-34
Accessory	group_108	group_108	2.38095	0	0.542151			Core SNP	c00432	group_122-nonsynonymous (T222A)	100	2.22222	6.77431e-34
Accessory	group_1115	group_1115	2.38095	0	0.542151			Core SNP	c00433	group_122-synonymous	100	2.22222	6.77431e-34
Accessory	oppA_2	oppA_2	2.38095	0	0.542151			Core SNP	c00434	group_122-synonymous	100	2.22222	6.77431e-34
Accessory	group_87	group_87	2.38095	0	0.542151			Core SNP	c00435	group_122-synonymous	100	2.22222	6.77431e-34
Accessory	group_126	group_126	2.38095	0	0.542151			Core SNP	c00436	group_122-synonymous	100	2.22222	6.77431e-34
Accessory	rpoS	rpoS	97.619	100	0.542151			Core SNP	c00437	group_122-synonymous	100	2.22222	6.77431e-34
Accessory	oppC	oppC	97.619	100	0.542151			Core SNP	c00438	group_122-synonymous	100	2.22222	6.77431e-34
Accessory	group_28	group_28	97.619	100	0.542151			Core SNP	c00439	group_122-synonymous	100	2.22222	6.77431e-34
Accessory	group_252	group_252	97.619	100	0.542151			Core SNP	c00431	group_122-synonymous	100	2.22222	6.77431e-34
Accessory	tilS	tilS	97.619	100	0.542151			Core SNP	c00440	group_122-synonymous	100	2.22222	6.77431e-34
Accessory	dcuA	dcuA	97.619	100	0.542151			Core SNP	c00406	group_122-synonymous	100	2.22222	6.77431e-34
Accessory	group_29	group_29	3.57143	0	0.551164			Core SNP	c00405	group_122-synonymous	100	2.22222	6.77431e-34
Accessory	group_84	group_84	3.57143	0	0.551164			Core SNP	c00404	group_122-synonymous	100	2.22222	6.77431e-34
Accessory	group_4475	group_4475	96.4286	100	0.551164			Core SNP	c00403	group_122-synonymous	100	2.22222	6.77431e-34
Accessory	group_253	group_253	96.4286	100	0.551164			Core SNP	c00402	group_122-synonymous	100	2.22222	6.77431e-34
Accessory	group_241	group_241	96.4286	100	0.551164			Core SNP	c00401	group_122-synonymous	100	2.22222	6.77431e-34
Accessory	group_45	group_45	96.4286	100	0.551164			Core SNP	c00400	group_122-synonymous	100	2.22222	6.77431e-34
Accessory	group_61	group_61	3.57143	0	0.551164			Core SNP	c00399	group_122-synonymous	100	2.22222	6.77431e-34
Accessory	group_83	group_83	3.57143	0	0.551164			Core SNP	c00441	group_122-synonymous	100	2.22222	6.77431e-34
Accessory	group_16	group_16	3.57143	0	0.551164			Core SNP	c00430	group_122-synonymous	100	2.22222	6.77431e-34
Accessory	group_437	group_437	2.38095	4.44444	0.610534			Core SNP	c00429	group_122-synonymous	100	2.22222	6.77431e-34
Accessory	group_4318	group_4318	2.38095	4.44444	0.610534			Core SNP	c00428	group_122-synonymous	100	2.22222	6.77431e-34
Accessory	group_563	group_563	7.14286	8.88889	0.738636			Core SNP	c00409	group_122-synonymous	100	2.22222	6.77431e-34
Accessory	group_127	group_127	48.8095	51.1111	0.854596			Core SNP	c00410	group_122-synonymous	100	2.22222	6.77431e-34
Accessory	group_128	group_128	1.19048	0	1			Core SNP	c00411	group_122-synonymous	100	2.22222	6.77431e-34
Accessory	group_130	group_130	1.19048	0	1			Core SNP	c00412	group_122-synonymous	100	2.22222	6.77431e-34
Accessory	dcuA_1	dcuA_1	1.19048	2.22222	1			Core SNP	c00413	group_122-synonymous	100	2.22222	6.77431e-34
Accessory	nlpD_2	nlpD_2	1.19048	0	1			Core SNP	c00414	group_122-synonymous	100	2.22222	6.77431e-34
Accessory	group_568	group_568	1.19048	2.22222	1			Core SNP	c00415	group_122-nonsynonymous (N194-)	100	2.22222	6.77431e-34
Accessory	group_66	group_66	1.19048	2.22222	1			Core SNP	c00416	group_122-nonsynonymous (G195E)	100	2.22222	6.77431e-34
Accessory	group_1195	group_1195	1.19048	0	1			Core SNP	c00417	group_122-synonymous	100	2.22222	6.77431e-34
Accessory	group_99	group_99	1.19048	2.22222	1			Core SNP	c00418	group_122-synonymous	100	2.22222	6.77431e-34
Accessory	group_1194	group_1194	1.19048	0	1			Core SNP	c00419	group_122-synonymous	100	2.22222	6.77431e-34
Accessory	group_1191	group_1191	1.19048	0	1			Core SNP	c00420	group_122-synonymous	100	2.22222	6.77431e-34
Accessory	group_1192	group_1192	1.19048	0	1			Core SNP	c00421	group_122-synonymous	100	2.22222	6.77431e-34
Accessory	group_1184	group_1184	1.19048	0	1			Core SNP	c00422	group_122-synonymous	100	2.22222	6.77431e-34
Accessory	dusB_2	dusB_2	1.19048	0	1			Core SNP	c00423	group_122-synonymous	100	2.22222	6.77431e-34
Accessory	group_763	group_763	1.19048	0	1			Core SNP	c00424	group_122-synonymous	100	2.22222	6.77431e-34
Accessory	group_762	group_762	1.19048	0	1			Core SNP	c00425	group_122-synonymous	100	2.22222	6.77431e-34
Accessory	group_761	group_761	1.19048	0	1			Core SNP	c00426	group_122-nonsynonymous (I214T)	100	2.22222	6.77431e-34
Accessory	group_760	group_760	1.19048	0	1			Core SNP	c00427	group_122-synonymous	100	2.22222	6.77431e-34
Accessory	group_1193	group_1193	1.19048	0	1			Core SNP	c00398	group_122-synonymous	100	2.22222	6.77431e-34
Accessory	group_755	group_755	1.19048	0	1			Core SNP	c00397	group_122-synonymous	100	2.22222	6.77431e-34
Accessory	group_1185	group_1185	1.19048	0	1			Core SNP	c00396	group_122-synonymous	100	2.22222	6.77431e-34
Accessory	group_1186	group_1186	1.19048	0	1			Core SNP	c00395	group_122-synonymous	100	2.22222	6.77431e-34
Accessory	group_1187	group_1187	1.19048	0	1			Core SNP	c02316	traC-synonymous	100	2.22222	6.77431e-34
Accessory	group_1188	group_1188	1.19048	0	1			Core SNP	c02315	traC-synonymous	100	2.22222	6.77431e-34
Accessory	phoR_2	phoR_2	1.19048	0	1			Core SNP	c02314	traC-synonymous	100	2.22222	6.77431e-34
Accessory	dacA_3	dacA_3	1.19048	0	1			Core SNP	c02313	traC-synonymous	100	2.22222	6.77431e-34
Accessory	cqsS_1	cqsS_1	1.19048	0	1			Core SNP	c02312	traC-synonymous	100	2.22222	6.77431e-34
Accessory	toxS_2	toxS_2	1.19048	2.22222	1			Core SNP	c02311	traC-synonymous	100	2.22222	6.77431e-34
Accessory	phnW_1	phnW_1	1.19048	0	1			Core SNP	c02310	traC-synonymous	100	2.22222	6.77431e-34
Accessory	group_46	group_46	2.38095	2.22222	1			Core SNP	c02309	traC-synonymous	100	2.22222	6.77431e-34
Accessory	group_57	group_57	1.19048	0	1			Core SNP	c02308	traC-synonymous	100	2.22222	6.77431e-34
Accessory	group_51	group_51	1.19048	0	1			Core SNP	c02307	traC-synonymous	100	2.22222	6.77431e-34
Accessory	group_41	group_41	1.19048	0	1			Core SNP	c02306	traC-synonymous	100	2.22222	6.77431e-34
Accessory	group_4	group_4	1.19048	0	1			Core SNP	c02305	traC-synonymous	100	2.22222	6.77431e-34
Accessory	group_381	group_381	1.19048	0	1			Core SNP	c02304	traC-nonsynonymous (N494D)	100	2.22222	6.77431e-34
Accessory	group_4347	group_4347	97.619	97.7778	1			Core SNP	c02303	traC-synonymous	100	2.22222	6.77431e-34
Accessory	neo	neo	96.4286	97.7778	1			Core SNP	c02302	traC-synonymous	100	2.22222	6.77431e-34
Accessory	group_371	group_371	96.4286	97.7778	1			Core SNP	c02301	traC-synonymous	100	2.22222	6.77431e-34
Accessory	folP_2	folP_2	96.4286	97.7778	1			Core SNP	c02300	traC-synonymous	100	2.22222	6.77431e-34
Accessory	hcpA_2	hcpA_2	95.2381	95.5556	1			Core SNP	c02299	traC-synonymous	100	2.22222	6.77431e-34
Accessory	group_4335	group_4335	94.0476	95.5556	1			Core SNP	c02298	traC-synonymous	100	2.22222	6.77431e-34
Accessory	luxR	luxR	94.0476	93.3333	1			Core SNP	c02317	traC-synonymous	100	2.22222	6.77431e-34
Accessory	group_37	group_37	1.19048	0	1			Core SNP	c02296	traC-synonymous	100	2.22222	6.77431e-34
Accessory	group_368	group_368	1.19048	0	1			Core SNP	c02318	traC-synonymous	100	2.22222	6.77431e-34
Accessory	group_386	group_386	52.381	51.1111	1			Core SNP	c02320	traC-synonymous	100	2.22222	6.77431e-34
Accessory	group_34	group_34	1.19048	0	1			Core SNP	c00394	group_122-synonymous	100	2.22222	6.77431e-34
Accessory	mutS_2	mutS_2	1.19048	0	1			Core SNP	c00393	group_122-synonymous	100	2.22222	6.77431e-34
Accessory	group_4316	group_4316	13.0952	11.1111	1			Core SNP	c00392	group_122-synonymous	100	2.22222	6.77431e-34
Accessory	luxR_1	luxR_1	1.19048	0	1			Core SNP	c00391	group_122-synonymous	100	2.22222	6.77431e-34
Accessory	rtxA_1	rtxA_1	1.19048	0	1			Core SNP	c00390	group_122-synonymous	100	2.22222	6.77431e-34
Accessory	group_4315	group_4315	5.95238	6.66667	1			Core SNP	c00389	group_122-synonymous	100	2.22222	6.77431e-34
Accessory	group_439	group_439	4.7619	4.44444	1			Core SNP	c00388	group_122-synonymous	100	2.22222	6.77431e-34
Accessory	group_382	group_382	3.57143	4.44444	1			Core SNP	c00387	group_122-synonymous	100	2.22222	6.77431e-34
Accessory	group_4314	group_4314	3.57143	2.22222	1			Core SNP	c00386	group_122-synonymous	100	2.22222	6.77431e-34
Accessory	group_1183	group_1183	1.19048	0	1			Core SNP	c00385	group_122-nonsynonymous (P14S)	100	2.22222	6.77431e-34
Accessory	group_2	group_2	1.19048	0	1			Core SNP	c00384	group_122-nonsynonymous (V12A)	100	2.22222	6.77431e-34
Accessory	mtnD	mtnD	1.19048	0	1			Core SNP	c02324	traC-synonymous	100	2.22222	6.77431e-34
Accessory	group_1182	group_1182	1.19048	0	1			Core SNP	c00383	group_120-synonymous	100	2.22222	6.77431e-34
Accessory	gdhB_1	gdhB_1	1.19048	0	1			Core SNP	c00382	group_120-synonymous	100	2.22222	6.77431e-34
Accessory	yhbO	yhbO	1.19048	0	1			Core SNP	c02323	traC-synonymous	100	2.22222	6.77431e-34
Accessory	group_1145	group_1145	1.19048	0	1			Core SNP	c02322	traC-synonymous	100	2.22222	6.77431e-34
Accessory	group_1144	group_1144	1.19048	0	1			Core SNP	c00381	group_120-nonsynonymous (K267N)	100	2.22222	6.77431e-34
Accessory	bolA_2	bolA_2	1.19048	0	1			Core SNP	c00380	group_120-synonymous	100	2.22222	6.77431e-34
Accessory	ribH_2	ribH_2	1.19048	0	1			Core SNP	c02321	traC-synonymous	100	2.22222	6.77431e-34
Accessory	evgS	evgS	1.19048	0	1			Core SNP	c02319	traC-synonymous	100	2.22222	6.77431e-34
Accessory	group_1141	group_1141	1.19048	0	1			Core SNP	c00408	group_122-synonymous	100	2.22222	6.77431e-34
Accessory	cysQ_2	cysQ_2	1.19048	0	1			Core SNP	c00311	dinG_2-synonymous	100	2.22222	6.77431e-34
Accessory	group_1139	group_1139	1.19048	0	1			Core SNP	c00309	dinG_2-synonymous	100	2.22222	6.77431e-34
Accessory	group_1138	group_1138	1.19048	0	1			Core SNP	c00707	group_196-nonsynonymous (S232N)	100	2.22222	6.77431e-34
Accessory	group_1137	group_1137	1.19048	0	1			Core SNP	c00708	group_196-nonsynonymous (I237T)	100	2.22222	6.77431e-34
Accessory	group_1136	group_1136	1.19048	0	1			Core SNP	c00709	group_196-synonymous	100	2.22222	6.77431e-34
Accessory	group_1135	group_1135	1.19048	0	1			Core SNP	c00710	group_196-nonsynonymous (T240A)	100	2.22222	6.77431e-34
Accessory	group_1134	group_1134	1.19048	0	1			Core SNP	c00711	group_196-nonsynonymous (D241A)	100	2.22222	6.77431e-34
Accessory	group_1133	group_1133	1.19048	0	1			Core SNP	c00712	group_196-synonymous	100	2.22222	6.77431e-34
Accessory	group_1132	group_1132	1.19048	0	1			Core SNP	c00713	group_196-nonsynonymous (T245M)	100	2.22222	6.77431e-34
Accessory	group_1131	group_1131	1.19048	0	1			Core SNP	c00714	group_196-nonsynonymous (A246G)	100	2.22222	6.77431e-34
Accessory	group_1119	group_1119	1.19048	0	1			Core SNP	c00706	group_196-nonsynonymous (D224Y)	100	2.22222	6.77431e-34
Accessory	group_112	group_112	1.19048	0	1			Core SNP	c00715	group_196-nonsynonymous (V248A)	100	2.22222	6.77431e-34
Accessory	group_1120	group_1120	1.19048	0	1			Core SNP	c00717	group_196-synonymous	100	2.22222	6.77431e-34
Accessory	group_1121	group_1121	1.19048	0	1			Core SNP	c00718	group_196-synonymous	100	2.22222	6.77431e-34
Accessory	group_1122	group_1122	1.19048	0	1			Core SNP	c00719	group_196-synonymous	100	2.22222	6.77431e-34
Accessory	dnaJ_2	dnaJ_2	1.19048	0	1			Core SNP	c00720	group_196-synonymous	100	2.22222	6.77431e-34
Accessory	group_1147	group_1147	1.19048	0	1			Core SNP	c00721	group_196-synonymous	100	2.22222	6.77431e-34
Accessory	group_1124	group_1124	1.19048	0	1			Core SNP	c00722	group_196-synonymous	100	2.22222	6.77431e-34
Accessory	pleD	pleD	1.19048	0	1			Core SNP	c00723	group_196-synonymous	100	2.22222	6.77431e-34
Accessory	group_1127	group_1127	1.19048	0	1			Core SNP	c00724	group_196-synonymous	100	2.22222	6.77431e-34
Accessory	group_1128	group_1128	1.19048	0	1			Core SNP	c00716	group_196-synonymous	100	2.22222	6.77431e-34
Accessory	group_82	group_82	1.19048	0	1			Core SNP	c00705	group_196-synonymous	100	2.22222	6.77431e-34
Accessory	group_1129	group_1129	1.19048	0	1			Core SNP	c00704	group_196-nonsynonymous (N219D)	100	2.22222	6.77431e-34
Accessory	group_1130	group_1130	1.19048	0	1			Core SNP	c00703	group_196-nonsynonymous (S217G)	100	2.22222	6.77431e-34
Accessory	group_1125	group_1125	1.19048	0	1			Core SNP	c00684	group_195-synonymous	100	2.22222	6.77431e-34
Accessory	group_1181	group_1181	1.19048	0	1			Core SNP	c00685	group_195-synonymous	100	2.22222	6.77431e-34
Accessory	copB	copB	1.19048	0	1			Core SNP	c00686	group_195-synonymous	100	2.22222	6.77431e-34
Accessory	group_1151	group_1151	1.19048	0	1			Core SNP	c00687	group_195-synonymous	100	2.22222	6.77431e-34
Accessory	group_1180	group_1180	1.19048	0	1			Core SNP	c00688	group_196-nonsynonymous (Q74K)	100	2.22222	6.77431e-34
Accessory	group_1179	group_1179	1.19048	0	1			Core SNP	c00689	group_196-synonymous	100	2.22222	6.77431e-34
Accessory	group_1178	group_1178	1.19048	0	1			Core SNP	c00690	group_196-synonymous	100	2.22222	6.77431e-34
Accessory	ybdO	ybdO	1.19048	0	1			Core SNP	c00691	group_196-synonymous	100	2.22222	6.77431e-34
Accessory	ratA	ratA	1.19048	0	1			Core SNP	c00692	group_196-synonymous	100	2.22222	6.77431e-34
Accessory	group_1175	group_1175	1.19048	0	1			Core SNP	c00693	group_196-nonsynonymous (S123C)	100	2.22222	6.77431e-34
Accessory	group_1174	group_1174	1.19048	0	1			Core SNP	c00694	group_196-nonsynonymous (L128P)	100	2.22222	6.77431e-34
Accessory	pyrH_2	pyrH_2	1.19048	0	1			Core SNP	c00695	group_196-synonymous	100	2.22222	6.77431e-34
Accessory	group_1172	group_1172	1.19048	0	1			Core SNP	c00696	group_196-synonymous	100	2.22222	6.77431e-34
Accessory	group_103	group_103	1.19048	0	1			Core SNP	c00697	group_196-synonymous	100	2.22222	6.77431e-34
Accessory	group_1171	group_1171	1.19048	0	1			Core SNP	c00698	group_196-synonymous	100	2.22222	6.77431e-34
Accessory	group_1170	group_1170	1.19048	0	1			Core SNP	c00699	group_196-synonymous	100	2.22222	6.77431e-34
Accessory	group_1169	group_1169	1.19048	0	1			Core SNP	c00700	group_196-synonymous	100	2.22222	6.77431e-34
Accessory	group_1168	group_1168	1.19048	0	1			Core SNP	c00701	group_196-synonymous	100	2.22222	6.77431e-34
Accessory	tagF	tagF	1.19048	0	1			Core SNP	c00702	group_196-nonsynonymous (A215S)	100	2.22222	6.77431e-34
Accessory	group_1166	group_1166	1.19048	0	1			Core SNP	c00725	group_196-nonsynonymous (V333I)	100	2.22222	6.77431e-34
Accessory	group_1165	group_1165	1.19048	0	1			Core SNP	c00726	group_196-synonymous	100	2.22222	6.77431e-34
Accessory	group_1152	group_1152	1.19048	0	1			Core SNP	c00727	group_196-synonymous	100	2.22222	6.77431e-34
Accessory	besE	besE	1.19048	0	1			Core SNP	c00728	group_196-synonymous	100	2.22222	6.77431e-34
Accessory	rplN_2	rplN_2	1.19048	0	1			Core SNP	c00752	group_196-synonymous	100	2.22222	6.77431e-34
Accessory	algA	algA	1.19048	0	1			Core SNP	c00753	group_196-synonymous	100	2.22222	6.77431e-34
Accessory	group_1156	group_1156	1.19048	0	1			Core SNP	c02247	traC-synonymous	100	2.22222	6.77431e-34
Accessory	group_1157	group_1157	1.19048	0	1			Core SNP	c00755	group_197-nonsynonymous (P8S)	100	2.22222	6.77431e-34
Accessory	group_1150	group_1150	1.19048	0	1			Core SNP	c00756	group_197-nonsynonymous (P16A)	100	2.22222	6.77431e-34
Accessory	group_1158	group_1158	1.19048	0	1			Core SNP	c00757	group_197-synonymous	100	2.22222	6.77431e-34
Accessory	group_79	group_79	1.19048	0	1			Core SNP	c00758	group_197-nonsynonymous (V50L)	100	2.22222	6.77431e-34
Accessory	group_1160	group_1160	1.19048	0	1			Core SNP	c00759	group_197-nonsynonymous (A66V)	100	2.22222	6.77431e-34
Accessory	group_1161	group_1161	1.19048	0	1			Core SNP	c00760	group_197-synonymous	100	2.22222	6.77431e-34
Accessory	osmY	osmY	1.19048	0	1			Core SNP	c00761	group_197-synonymous	100	2.22222	6.77431e-34
Accessory	group_1163	group_1163	1.19048	0	1			Core SNP	c02246	traC-synonymous	100	2.22222	6.77431e-34
Accessory	group_1164	group_1164	1.19048	0	1			Core SNP	c00763	group_198-nonsynonymous (A13S)	100	2.22222	6.77431e-34
Accessory	group_1159	group_1159	1.19048	0	1			Core SNP	c00764	group_198-synonymous	100	2.22222	6.77431e-34
Accessory	oprF_2	oprF_2	1.19048	0	1			Core SNP	c00765	group_198-synonymous	100	2.22222	6.77431e-34
								Core SNP	c00766	group_198-synonymous	100	2.22222	6.77431e-34
								Core SNP	c00767	group_198-synonymous	100	2.22222	6.77431e-34
								Core SNP	c00768	group_198-synonymous	100	2.22222	6.77431e-34
								Core SNP	c00769	group_198-synonymous	100	2.22222	6.77431e-34
								Core SNP	c00770	group_198-synonymous	100	2.22222	6.77431e-34
								Core SNP	c00751	group_196-nonsynonymous (M530V)	100	2.22222	6.77431e-34
								Core SNP	c00683	group_195-synonymous	100	2.22222	6.77431e-34
								Core SNP	c00750	group_196-nonsynonymous (M530V)	100	2.22222	6.77431e-34
								Core SNP	c00748	group_196-nonsynonymous (K523R)	100	2.22222	6.77431e-34
								Core SNP	c00729	group_196-synonymous	100	2.22222	6.77431e-34
								Core SNP	c00730	group_196-synonymous	100	2.22222	6.77431e-34
								Core SNP	c00731	group_196-synonymous	100	2.22222	6.77431e-34
								Core SNP	c00732	group_196-synonymous	100	2.22222	6.77431e-34
								Core SNP	c00733	group_196-synonymous	100	2.22222	6.77431e-34
								Core SNP	c00734	group_196-synonymous	100	2.22222	6.77431e-34
								Core SNP	c00735	group_196-synonymous	100	2.22222	6.77431e-34
								Core SNP	c00736	group_196-synonymous	100	2.22222	6.77431e-34
								Core SNP	c00737	group_196-synonymous	100	2.22222	6.77431e-34
								Core SNP	c00738	group_196-synonymous	100	2.22222	6.77431e-34
								Core SNP	c00739	group_196-synonymous	100	2.22222	6.77431e-34
								Core SNP	c00740	group_196-synonymous	100	2.22222	6.77431e-34
								Core SNP	c00741	group_196-nonsynonymous (A412V)	100	2.22222	6.77431e-34
								Core SNP	c00742	group_196-nonsynonymous (I437V)	100	2.22222	6.77431e-34
								Core SNP	c00743	group_196-synonymous	100	2.22222	6.77431e-34
								Core SNP	c00744	group_196-nonsynonymous (C451Y)	100	2.22222	6.77431e-34
								Core SNP	c00745	group_196-synonymous	100	2.22222	6.77431e-34
								Core SNP	c00746	group_196-synonymous	100	2.22222	6.77431e-34
								Core SNP	c00747	group_196-synonymous	100	2.22222	6.77431e-34
								Core SNP	c00749	group_196-synonymous	100	2.22222	6.77431e-34
								Core SNP	c00310	dinG_2-synonymous	100	2.22222	6.77431e-34
								Core SNP	c00682	group_195-synonymous	100	2.22222	6.77431e-34
								Core SNP	c00680	group_195-synonymous	100	2.22222	6.77431e-34
								Core SNP	c00275	cobS_2-synonymous	100	2.22222	6.77431e-34
								Core SNP	c00274	cobS_2-synonymous	100	2.22222	6.77431e-34
								Core SNP	c00273	cobS_2-synonymous	100	2.22222	6.77431e-34
								Core SNP	c00272	cobS_2-synonymous	100	2.22222	6.77431e-34
								Core SNP	c00271	cobS_2-synonymous	100	2.22222	6.77431e-34
								Core SNP	c00270	cobS_2-synonymous	100	2.22222	6.77431e-34
								Core SNP	c00269	cobS_2-synonymous	100	2.22222	6.77431e-34
								Core SNP	c00268	cobS_2-nonsynonymous (A159V)	100	2.22222	6.77431e-34
								Core SNP	c00276	cobS_2-synonymous	100	2.22222	6.77431e-34
								Core SNP	c00267	cobS_2-synonymous	100	2.22222	6.77431e-34
								Core SNP	c00265	cobS_2-synonymous	100	2.22222	6.77431e-34
								Core SNP	c00264	cobS_2-synonymous	100	2.22222	6.77431e-34
								Core SNP	c00263	cobS_2-synonymous	100	2.22222	6.77431e-34
								Core SNP	c00262	cobS_2-nonsynonymous (N60H)	100	2.22222	6.77431e-34
								Core SNP	c00261	cobS_2-nonsynonymous (S29G)	100	2.22222	6.77431e-34
								Core SNP	c00260	cobS_2-nonsynonymous (F28Y)	100	2.22222	6.77431e-34
								Core SNP	c00259	cobS_2-synonymous	100	2.22222	6.77431e-34
								Core SNP	c02252	traC-synonymous	100	2.22222	6.77431e-34
								Core SNP	c00266	cobS_2-synonymous	100	2.22222	6.77431e-34
								Core SNP	c00277	cobS_2-synonymous	100	2.22222	6.77431e-34
								Core SNP	c00278	cobS_2-synonymous	100	2.22222	6.77431e-34
								Core SNP	c00279	cobS_2-synonymous	100	2.22222	6.77431e-34
								Core SNP	c02265	traC-synonymous	100	2.22222	6.77431e-34
								Core SNP	c02264	traC-synonymous	100	2.22222	6.77431e-34
								Core SNP	c02263	traC-nonsynonymous (T169N)	100	2.22222	6.77431e-34
								Core SNP	c02262	traC-synonymous	100	2.22222	6.77431e-34
								Core SNP	c02261	traC-synonymous	100	2.22222	6.77431e-34
								Core SNP	c02260	traC-synonymous	100	2.22222	6.77431e-34
								Core SNP	c02259	traC-synonymous	100	2.22222	6.77431e-34
								Core SNP	c02258	traC-synonymous	100	2.22222	6.77431e-34
								Core SNP	c02257	traC-synonymous	100	2.22222	6.77431e-34
								Core SNP	c02256	traC-synonymous	100	2.22222	6.77431e-34
								Core SNP	c02255	traC-synonymous	100	2.22222	6.77431e-34
								Core SNP	c00772	group_198-nonsynonymous (A121T)	100	2.22222	6.77431e-34
								Core SNP	c02254	traC-synonymous	100	2.22222	6.77431e-34
								Core SNP	c02253	traC-synonymous	100	2.22222	6.77431e-34
								Core SNP	c00284	cobS_2-synonymous	100	2.22222	6.77431e-34
								Core SNP	c00283	cobS_2-synonymous	100	2.22222	6.77431e-34
								Core SNP	c00282	cobS_2-synonymous	100	2.22222	6.77431e-34
								Core SNP	c00281	cobS_2-synonymous	100	2.22222	6.77431e-34
								Core SNP	c00280	cobS_2-synonymous	100	2.22222	6.77431e-34
								Core SNP	c02251	traC-synonymous	100	2.22222	6.77431e-34
								Core SNP	c00681	group_195-synonymous	100	2.22222	6.77431e-34
								Core SNP	c02250	traC-synonymous	100	2.22222	6.77431e-34
								Core SNP	c00640	group_195-synonymous	100	2.22222	6.77431e-34
								Core SNP	c00662	group_195-synonymous	100	2.22222	6.77431e-34
								Core SNP	c00663	group_195-nonsynonymous (Y174F)	100	2.22222	6.77431e-34
								Core SNP	c00664	group_195-nonsynonymous (N177S)	100	2.22222	6.77431e-34
								Core SNP	c00665	group_195-synonymous	100	2.22222	6.77431e-34
								Core SNP	c00666	group_195-synonymous	100	2.22222	6.77431e-34
								Core SNP	c00667	group_195-synonymous	100	2.22222	6.77431e-34
								Core SNP	c00668	group_195-synonymous	100	2.22222	6.77431e-34
								Core SNP	c00669	group_195-synonymous	100	2.22222	6.77431e-34
								Core SNP	c00661	group_195-synonymous	100	2.22222	6.77431e-34
								Core SNP	c00670	group_195-synonymous	100	2.22222	6.77431e-34
								Core SNP	c00672	group_195-synonymous	100	2.22222	6.77431e-34
								Core SNP	c00673	group_195-synonymous	100	2.22222	6.77431e-34
								Core SNP	c00674	group_195-synonymous	100	2.22222	6.77431e-34
								Core SNP	c00675	group_195-synonymous	100	2.22222	6.77431e-34
								Core SNP	c00676	group_195-synonymous	100	2.22222	6.77431e-34
								Core SNP	c00677	group_195-synonymous	100	2.22222	6.77431e-34
								Core SNP	c00678	group_195-synonymous	100	2.22222	6.77431e-34
								Core SNP	c00679	group_195-synonymous	100	2.22222	6.77431e-34
								Core SNP	c00671	group_195-synonymous	100	2.22222	6.77431e-34
								Core SNP	c00639	group_195-nonsynonymous (D8E)	100	2.22222	6.77431e-34
								Core SNP	c00660	group_195-nonsynonymous (M155L)	100	2.22222	6.77431e-34
								Core SNP	c00658	group_195-nonsynonymous (R121K)	100	2.22222	6.77431e-34
								Core SNP	c00641	group_195-nonsynonymous (V21I)	100	2.22222	6.77431e-34
								Core SNP	c02249	traC-synonymous	100	2.22222	6.77431e-34
								Core SNP	c00642	group_195-synonymous	100	2.22222	6.77431e-34
								Core SNP	c00643	group_195-synonymous	100	2.22222	6.77431e-34
								Core SNP	c02248	traC-synonymous	100	2.22222	6.77431e-34
								Core SNP	c00644	group_195-synonymous	100	2.22222	6.77431e-34
								Core SNP	c00645	group_195-synonymous	100	2.22222	6.77431e-34
								Core SNP	c00646	group_195-synonymous	100	2.22222	6.77431e-34
								Core SNP	c00647	group_195-synonymous	100	2.22222	6.77431e-34
								Core SNP	c00659	group_195-nonsynonymous (D124E)	100	2.22222	6.77431e-34
								Core SNP	c00648	group_195-synonymous	100	2.22222	6.77431e-34
								Core SNP	c00650	group_195-synonymous	100	2.22222	6.77431e-34
								Core SNP	c00651	group_195-nonsynonymous (I108S)	100	2.22222	6.77431e-34
								Core SNP	c00652	group_195-synonymous	100	2.22222	6.77431e-34
								Core SNP	c00653	group_195-synonymous	100	2.22222	6.77431e-34
								Core SNP	c00654	group_195-nonsynonymous (P110A)	100	2.22222	6.77431e-34
								Core SNP	c00655	group_195-nonsynonymous (P112T)	100	2.22222	6.77431e-34
								Core SNP	c00656	group_195-nonsynonymous (S113R)	100	2.22222	6.77431e-34
								Core SNP	c00657	group_195-synonymous	100	2.22222	6.77431e-34
								Core SNP	c00649	group_195-nonsynonymous (I81V)	100	2.22222	6.77431e-34
								Core SNP	c00407	group_122-synonymous	100	2.22222	6.77431e-34
								Core SNP	c01947	mltD-nonsynonymous (G246D)	97.619	0	8.61533e-33
								Core SNP	c00479	group_122-synonymous	100	4.44444	2.91295e-32
								Core SNP	c00443	group_122-synonymous	100	4.44444	2.91295e-32
								Core SNP	c00476	group_122-nonsynonymous (E288D)	100	4.44444	2.91295e-32
								Core SNP	c00477	group_122-nonsynonymous (H290Q)	100	4.44444	2.91295e-32
								Core SNP	c00478	group_122-synonymous	100	4.44444	2.91295e-32
								Core SNP	c00480	group_122-nonsynonymous (W292A)	100	4.44444	2.91295e-32
								Core SNP	c00481	group_122-synonymous	100	4.44444	2.91295e-32
								Core SNP	c00482	group_122-synonymous	100	4.44444	2.91295e-32
								Core SNP	c00483	group_122-synonymous	100	4.44444	2.91295e-32
								Core SNP	c00484	group_122-nonsynonymous (Y296L)	100	4.44444	2.91295e-32
								Core SNP	c00485	group_122-synonymous	100	4.44444	2.91295e-32
								Core SNP	c00486	group_122-synonymous	100	4.44444	2.91295e-32
								Core SNP	c00487	group_122-synonymous	100	4.44444	2.91295e-32
								Core SNP	c00488	group_122-nonsynonymous (Q297G)	100	4.44444	2.91295e-32
								Core SNP	c00489	group_122-nonsynonymous (T298A)	100	4.44444	2.91295e-32
								Core SNP	c00475	group_122-synonymous	100	4.44444	2.91295e-32
								Core SNP	c00490	group_122-synonymous	100	4.44444	2.91295e-32
								Core SNP	c00492	group_122-synonymous	100	4.44444	2.91295e-32
								Core SNP	c00493	group_122-synonymous	100	4.44444	2.91295e-32
								Core SNP	c00494	group_122-synonymous	100	4.44444	2.91295e-32
								Core SNP	c00495	group_122-synonymous	100	4.44444	2.91295e-32
								Core SNP	c00497	group_122-synonymous	100	4.44444	2.91295e-32
								Core SNP	c00498	group_122-nonsynonymous (A306K)	100	4.44444	2.91295e-32
								Core SNP	c00499	group_122-synonymous	100	4.44444	2.91295e-32
								Core SNP	c00500	group_122-synonymous	100	4.44444	2.91295e-32
								Core SNP	c00501	group_122-synonymous	100	4.44444	2.91295e-32
								Core SNP	c00502	group_122-synonymous	100	4.44444	2.91295e-32
								Core SNP	c00503	group_122-nonsynonymous (F311Y)	100	4.44444	2.91295e-32
								Core SNP	c00504	group_122-synonymous	100	4.44444	2.91295e-32
								Core SNP	c00505	group_122-nonsynonymous (*317-)	100	4.44444	2.91295e-32
								Core SNP	c00491	group_122-synonymous	100	4.44444	2.91295e-32
								Core SNP	c00474	group_122-nonsynonymous (P287R)	100	4.44444	2.91295e-32
								Core SNP	c00496	group_122-synonymous	100	4.44444	2.91295e-32
								Core SNP	c00472	group_122-nonsynonymous (T286P)	100	4.44444	2.91295e-32
								Core SNP	c00444	group_122-synonymous	100	4.44444	2.91295e-32
								Core SNP	c00445	group_122-nonsynonymous (K254T)	100	4.44444	2.91295e-32
								Core SNP	c00446	group_122-synonymous	100	4.44444	2.91295e-32
								Core SNP	c00447	group_122-synonymous	100	4.44444	2.91295e-32
								Core SNP	c00448	group_122-synonymous	100	4.44444	2.91295e-32
								Core SNP	c00449	group_122-synonymous	100	4.44444	2.91295e-32
								Core SNP	c00450	group_122-nonsynonymous (I260V)	100	4.44444	2.91295e-32
								Core SNP	c00451	group_122-synonymous	100	4.44444	2.91295e-32
								Core SNP	c00452	group_122-synonymous	100	4.44444	2.91295e-32
								Core SNP	c00453	group_122-synonymous	100	4.44444	2.91295e-32
								Core SNP	c00454	group_122-synonymous	100	4.44444	2.91295e-32
								Core SNP	c00455	group_122-synonymous	100	4.44444	2.91295e-32
								Core SNP	c00457	group_122-synonymous	100	4.44444	2.91295e-32
								Core SNP	c00458	group_122-synonymous	100	4.44444	2.91295e-32
								Core SNP	c00456	group_122-synonymous	100	4.44444	2.91295e-32
								Core SNP	c00460	group_122-synonymous	100	4.44444	2.91295e-32
								Core SNP	c00471	group_122-nonsynonymous (K285E)	100	4.44444	2.91295e-32
								Core SNP	c00470	group_122-synonymous	100	4.44444	2.91295e-32
								Core SNP	c00469	group_122-synonymous	100	4.44444	2.91295e-32
								Core SNP	c00468	group_122-synonymous	100	4.44444	2.91295e-32
								Core SNP	c00459	group_122-nonsynonymous (N275H)	100	4.44444	2.91295e-32
								Core SNP	c00466	group_122-nonsynonymous (A152S)	100	4.44444	2.91295e-32
								Core SNP	c00467	group_122-synonymous	100	4.44444	2.91295e-32
								Core SNP	c00464	group_122-synonymous	100	4.44444	2.91295e-32
								Core SNP	c00463	group_122-nonsynonymous (A281K)	100	4.44444	2.91295e-32
								Core SNP	c00462	group_122-synonymous	100	4.44444	2.91295e-32
								Core SNP	c00461	group_122-synonymous	100	4.44444	2.91295e-32
								Core SNP	c00465	group_122-synonymous	100	4.44444	2.91295e-32
								Core SNP	c00473	group_122-synonymous	100	4.44444	2.91295e-32
								Core SNP	c01580	group_4471-nonsynonymous (H364N)	100	6.66667	8.44756e-31
								Core SNP	c00018	bepA_1-synonymous	100	6.66667	8.44756e-31
								Core SNP	c00257	coaD-nonsynonymous (A140T)	100	6.66667	8.44756e-31
								Core SNP	c02204	rpsD-synonymous	100	6.66667	8.44756e-31
								Core SNP	c01606	hemL-synonymous	100	11.1111	3.30807e-28
								Core SNP	c02227	sdaC_1-nonsynonymous (G288E)	100	11.1111	3.30807e-28
								Core SNP	c02112	ompU_2-nonsynonymous (G325D,C)	98.8095	13.3333	1.85582e-25
								Core SNP	c00015	barA-nonsynonymous (R564H)	100	17.7778	7.41834e-25
								Core SNP	c02232	smrA-nonsynonymous (D192G)	0	80	7.66561e-24
								Core SNP	c01525	group_4287-nonsynonymous (I44L)	0	80	7.66561e-24
								Core SNP	c01553	group_4408-nonsynonymous (M15I)	78.5714	0	2.06315e-20
								Core SNP	c01530	group_4303-nonsynonymous (V540M)	78.5714	0	2.06315e-20
								Core SNP	c01551	group_4402-nonsynonymous (S74N)	78.5714	0	2.06315e-20
								Core SNP	c00255	clpS-nonsynonymous (I8F)	78.5714	0	2.06315e-20
								Core SNP	c01603	gshB-nonsynonymous (T93I)	78.5714	0	2.06315e-20
								Core SNP	c01526	group_4287-synonymous	78.5714	0	2.06315e-20
								Core SNP	c00364	fabV_1-nonsynonymous (P149H)	59.5238	0	2.78559e-13
								Core SNP	c00297	dapF-synonymous	59.5238	0	2.78559e-13
								Core SNP	c00572	group_14-nonsynonymous (G866-)	94.0476	35.5556	1.26565e-12
								Core SNP	c00007	add-synonymous	51.1905	0	9.06012e-11
								Core SNP	c00637	group_1907-synonymous	51.1905	0	9.06012e-11
								Core SNP	c02242	torS-nonsynonymous (T701A)	0	40	3.89332e-10
								Core SNP	c01508	group_364-synonymous	0	40	3.89332e-10
								Core SNP	c02375	ydhC_1-nonsynonymous (V54M)	0	40	3.89332e-10
								Core SNP	c02195	rhaS_4-nonsynonymous (D141N)	0	35.5556	6.06821e-09
								Core SNP	c01540	group_4357-non-synonymous (H822Y)	0	35.5556	6.06821e-09
								Core SNP	c01562	group_4424-non-synonymous (F126L)	33.3333	0	9.87718e-07
								Core SNP	c01571	group_4449-non-synonymous (A143T)	0	17.7778	0.000141418
								Core SNP	c01550	group_4399-non-synonymous (A209V)	0	13.3333	0.00143193
								Core SNP	c01899	intA_3-non-synonymous (T175K)	0	13.3333	0.00143193
								Core SNP	c02345	tufB-synonymous	88.0952	64.4444	0.00239814
								Core SNP	c02346	tufB-synonymous	88.0952	64.4444	0.00239814
								Core SNP	c00357	eda-synonymous	0	11.1111	0.00443898
								Core SNP	c02092	nanH-non-synonymous (V237M)	0	11.1111	0.00443898
								Core SNP	c02379	yjcS-synonymous	11.9048	0	0.0145992
								Core SNP	c02155	phrB-non-synonymous (A65T)	11.9048	0	0.0145992
								Core SNP	c01911	lpoA-non-synonymous (R425C)	11.9048	0	0.0145992
								Core SNP	c01234	group_2848-synonymous	10.7143	0	0.026611
								Core SNP	c00362	fabH1-synonymous	10.7143	0	0.026611
								Core SNP	c00904	group_200-synonymous	0	6.66667	0.0406004
								Core SNP	c01933	menA-non-synonymous (A205V)	0	6.66667	0.0406004
								Core SNP	c00253	citF-non-synonymous (Y494F)	0	6.66667	0.0406004
								Core SNP	c02199	rlmJ-non-synonymous (A84T)	0	6.66667	0.0406004
								Core SNP	c01903	leuC-non-synonymous (A386T)	0	6.66667	0.0406004
								Core SNP	c00358	endo_I_1-non-synonymous (G292C)	0	6.66667	0.0406004
								Core SNP	c01912	luxO_1-non-synonymous (P41S)	1.19048	8.88889	0.0499114
								Core SNP	c02349	tufB-synonymous	7.14286	17.7778	0.0787083
								Core SNP	c02348	tufB-synonymous	7.14286	17.7778	0.0787083
								Core SNP	c02350	tufB-synonymous	7.14286	17.7778	0.0787083
								Core SNP	c02132	pepN-synonymous	8.33333	0	0.095228
								Core SNP	c02117	padC-non-synonymous (Y162C)	8.33333	0	0.095228
								Core SNP	c00293	cysG_2-non-synonymous (A225V)	8.33333	0	0.095228
								Core SNP	c00762	group_1972-synonymous	8.33333	0	0.095228
								Core SNP	c01574	group_4460-synonymous	8.33333	0	0.095228
								Core SNP	c02236	tadA_2-non-synonymous (E525D)	8.33333	0	0.095228
								Core SNP	c02224	sasA_10-non-synonymous (A497V)	0	4.44444	0.119913
								Core SNP	c00442	group_122-non-synonymous (E248*)	0	4.44444	0.119913
								Core SNP	c01514	group_4069-synonymous	0	4.44444	0.119913
								Core SNP	c01577	group_4464-synonymous	0	4.44444	0.119913
								Core SNP	c02206	rpsS-synonymous	0	4.44444	0.119913
								Core SNP	c02198	rlmB_2-non-synonymous (A61V)	0	4.44444	0.119913
								Core SNP	c01954	mukE-non-synonymous (A15T)	0	4.44444	0.119913
								Core SNP	c01569	group_4447-non-synonymous (M280I)	0	4.44444	0.119913
								Core SNP	c00035	btuB_1-non-synonymous (D431G)	0	4.44444	0.119913
								Core SNP	c02153	phhA-synonymous	0	4.44444	0.119913
								Core SNP	c00363	fabV_1-non-synonymous (P36Q)	0	4.44444	0.119913
								Core SNP	c01917	luxO_1-synonymous	1.19048	6.66667	0.121801
								Core SNP	c01921	malT_1-non-synonymous (A41V)	8.33333	2.22222	0.259969
								Core SNP	c01913	luxO_1-non-synonymous (I96N)	1.19048	4.44444	0.278538
								Core SNP	c02359	valS-non-synonymous (R599H)	4.7619	0	0.297061
								Core SNP	c02378	yihI-non-synonymous (D167Y)	4.7619	0	0.297061
								Core SNP	c02105	ntrC-synonymous	4.7619	0	0.297061
								Core SNP	c01932	mcpP_3-non-synonymous (T449A)	0	2.22222	0.348837
								Core SNP	c01936	metE-non-synonymous (I603M)	0	2.22222	0.348837
								Core SNP	c01928	mccF-synonymous	0	2.22222	0.348837
								Core SNP	c01927	mccF-non-synonymous (I216V)	0	2.22222	0.348837
								Core SNP	c01937	metE-non-synonymous (D604Y)	0	2.22222	0.348837
								Core SNP	c01923	malT_1-non-synonymous (R577W)	0	2.22222	0.348837
								Core SNP	c01918	luxO_1-non-synonymous (G319D)	0	2.22222	0.348837
								Core SNP	c01931	mcpP_3-non-synonymous (A20T)	0	2.22222	0.348837
								Core SNP	c02207	rsmI-synonymous	0	2.22222	0.348837
								Core SNP	c01900	iscU-synonymous	0	2.22222	0.348837
								Core SNP	c02196	rhtB_2-synonymous	0	2.22222	0.348837
								Core SNP	c02202	rpoB-non-synonymous (L865F)	0	2.22222	0.348837
								Core SNP	c01938	metE-synonymous	0	2.22222	0.348837
								Core SNP	c02208	rsmI-non-synonymous (S171W)	0	2.22222	0.348837
								Core SNP	c02209	rsmI-non-synonymous (P172R)	0	2.22222	0.348837
								Core SNP	c02210	rsmI-non-synonymous (H173E)	0	2.22222	0.348837
								Core SNP	c02211	rsmI-non-synonymous (R174L)	0	2.22222	0.348837
								Core SNP	c02212	rsmI-non-synonymous (I175T)	0	2.22222	0.348837
								Core SNP	c02213	rsmI-non-synonymous (C176T)	0	2.22222	0.348837
								Core SNP	c02214	rsmI-non-synonymous (E177Q)	0	2.22222	0.348837
								Core SNP	c02215	rsmI-synonymous	0	2.22222	0.348837
								Core SNP	c02216	rsmI-synonymous	0	2.22222	0.348837
								Core SNP	c02220	rtxA-synonymous	0	2.22222	0.348837
								Core SNP	c02233	spo0M-non-synonymous (A203V)	0	2.22222	0.348837
								Core SNP	c01898	ilvI-synonymous	0	2.22222	0.348837
								Core SNP	c02380	ypdB-non-synonymous (R245L)	0	2.22222	0.348837
								Core SNP	c01939	metE-non-synonymous (A607G)	0	2.22222	0.348837
								Core SNP	c01561	group_4423-synonymous	0	2.22222	0.348837
								Core SNP	c01941	metE-non-synonymous (K616N)	0	2.22222	0.348837
								Core SNP	c01586	group_4480-non-synonymous (S184V)	0	2.22222	0.348837
								Core SNP	c01585	group_4480-non-synonymous (A183V)	0	2.22222	0.348837
								Core SNP	c00034	brnQ-non-synonymous (M175V)	0	2.22222	0.348837
								Core SNP	c01567	group_4444-synonymous	0	2.22222	0.348837
								Core SNP	c01557	group_4419-synonymous	0	2.22222	0.348837
								Core SNP	c01555	group_4412-non-synonymous (P355S)	0	2.22222	0.348837
								Core SNP	c01545	group_4369-synonymous	0	2.22222	0.348837
								Core SNP	c01541	group_4357-non-synonymous (A941V)	0	2.22222	0.348837
								Core SNP	c02363	vgrG1_2-synonymous	0	2.22222	0.348837
								Core SNP	c02362	vgrG1_1-synonymous	0	2.22222	0.348837
								Core SNP	c01535	group_4332-non-synonymous (A449V)	0	2.22222	0.348837
								Core SNP	c01587	group_4480-synonymous	0	2.22222	0.348837
								Core SNP	c02361	vgrG1_1-synonymous	0	2.22222	0.348837
								Core SNP	c01529	group_4298-synonymous	0	2.22222	0.348837
								Core SNP	c01528	group_4296-non-synonymous (V199A)	0	2.22222	0.348837
								Core SNP	c01527	group_4291-synonymous	0	2.22222	0.348837
								Core SNP	c01523	group_4280-non-synonymous (T138A)	0	2.22222	0.348837
								Core SNP	c01522	group_4279-non-synonymous (V64I)	0	2.22222	0.348837
								Core SNP	c02360	vgrG1_1-synonymous	0	2.22222	0.348837
								Core SNP	c01516	group_4264-synonymous	0	2.22222	0.348837
								Core SNP	c01512	group_3893-synonymous	0	2.22222	0.348837
								Core SNP	c01506	group_3392-synonymous	0	2.22222	0.348837
								Core SNP	c01504	group_3196-synonymous	0	2.22222	0.348837
								Core SNP	c02194	relE_2-non-synonymous (D48E)	0	2.22222	0.348837
								Core SNP	c01532	group_4304-non-synonymous (A686V)	0	2.22222	0.348837
								Core SNP	c01940	metE-synonymous	0	2.22222	0.348837
								Core SNP	c01588	group_4480-non-synonymous (V186G)	0	2.22222	0.348837
								Core SNP	c01590	group_4480-non-synonymous (L192R)	0	2.22222	0.348837
								Core SNP	c01942	metE-non-synonymous (R617P)	0	2.22222	0.348837
								Core SNP	c01943	metE-non-synonymous (Q620K)	0	2.22222	0.348837
								Core SNP	c01944	metE-non-synonymous (D624E)	0	2.22222	0.348837
								Core SNP	c01945	metE-non-synonymous (A626P)	0	2.22222	0.348837
								Core SNP	c01948	mnmC-synonymous	0	2.22222	0.348837
								Core SNP	c01951	mreB-synonymous	0	2.22222	0.348837
								Core SNP	c01953	mukB-synonymous	0	2.22222	0.348837
								Core SNP	c00006	acyP-synonymous	0	2.22222	0.348837
								Core SNP	c02376	yeeZ-synonymous	0	2.22222	0.348837
								Core SNP	c01608	hisI-synonymous	0	2.22222	0.348837
								Core SNP	c01607	hisA-non-synonymous (S114R)	0	2.22222	0.348837
								Core SNP	c01589	group_4480-non-synonymous (A190V)	0	2.22222	0.348837
								Core SNP	c00009	appC-synonymous	0	2.22222	0.348837
								Core SNP	c01602	group_78-non-synonymous (D147R)	0	2.22222	0.348837
								Core SNP	c01601	group_78-non-synonymous (A146F)	0	2.22222	0.348837
								Core SNP	c01600	group_78-non-synonymous (L145R)	0	2.22222	0.348837
								Core SNP	c01599	group_78-non-synonymous (S144P)	0	2.22222	0.348837
								Core SNP	c01598	group_78-synonymous	0	2.22222	0.348837
								Core SNP	c01597	group_78-non-synonymous (G7E)	0	2.22222	0.348837
								Core SNP	c01596	group_49-synonymous	0	2.22222	0.348837
								Core SNP	c01594	group_4480-non-synonymous (M195K)	0	2.22222	0.348837
								Core SNP	c01593	group_4480-non-synonymous (G194D)	0	2.22222	0.348837
								Core SNP	c01592	group_4480-synonymous	0	2.22222	0.348837
								Core SNP	c01591	group_4480-non-synonymous (G193E)	0	2.22222	0.348837
								Core SNP	c01417	group_3008-synonymous	0	2.22222	0.348837
								Core SNP	c02189	rcsC_10-non-synonymous (L461Q)	0	2.22222	0.348837
								Core SNP	c02150	pglF-synonymous	0	2.22222	0.348837
								Core SNP	c00508	group_135-non-synonymous (D247Q)	0	2.22222	0.348837
								Core SNP	c01179	group_226-synonymous	0	2.22222	0.348837
								Core SNP	c01180	group_226-synonymous	0	2.22222	0.348837
								Core SNP	c01181	group_226-synonymous	0	2.22222	0.348837
								Core SNP	c01182	group_226-non-synonymous (H205N)	0	2.22222	0.348837
								Core SNP	c01183	group_226-non-synonymous (Q206R)	0	2.22222	0.348837
								Core SNP	c01184	group_226-non-synonymous (V207L)	0	2.22222	0.348837
								Core SNP	c01185	group_226-non-synonymous (I208N)	0	2.22222	0.348837
								Core SNP	c01186	group_226-non-synonymous (I209*)	0	2.22222	0.348837
								Core SNP	c01187	group_226-synonymous	0	2.22222	0.348837
								Core SNP	c01188	group_226-synonymous	0	2.22222	0.348837
								Core SNP	c01189	group_226-synonymous	0	2.22222	0.348837
								Core SNP	c01190	group_226-synonymous	0	2.22222	0.348837
								Core SNP	c02135	pglF-non-synonymous (Q496L)	0	2.22222	0.348837
								Core SNP	c00378	gltB_2-synonymous	0	2.22222	0.348837
								Core SNP	c01200	group_234-non-synonymous (D88N)	0	2.22222	0.348837
								Core SNP	c01201	group_234-non-synonymous (V92A)	0	2.22222	0.348837
								Core SNP	c01202	group_234-non-synonymous (L95F)	0	2.22222	0.348837
								Core SNP	c01203	group_234-synonymous	0	2.22222	0.348837
								Core SNP	c01204	group_234-synonymous	0	2.22222	0.348837
								Core SNP	c02111	ompU_2-non-synonymous (G325C)	0	2.22222	0.348837
								Core SNP	c00377	gltB_1-synonymous	0	2.22222	0.348837
								Core SNP	c00375	glpQ_2-synonymous	0	2.22222	0.348837
								Core SNP	c01211	group_2534-synonymous	0	2.22222	0.348837
								Core SNP	c02136	pglF-non-synonymous (G504A)	0	2.22222	0.348837
								Core SNP	c00372	glmU-synonymous	0	2.22222	0.348837
								Core SNP	c02137	pglF-non-synonymous (Q505V)	0	2.22222	0.348837
								Core SNP	c02138	pglF-non-synonymous (V506I)	0	2.22222	0.348837
								Core SNP	c00360	epsF_1-synonymous	0	2.22222	0.348837
								Core SNP	c00359	epmA-non-synonymous (M130V)	0	2.22222	0.348837
								Core SNP	c01178	group_226-synonymous	0	2.22222	0.348837
								Core SNP	c02188	queG-non-synonymous (E172K)	0	2.22222	0.348837
								Core SNP	c01177	group_226-non-synonymous (E203-)	0	2.22222	0.348837
								Core SNP	c01175	group_226-non-synonymous (T201R)	0	2.22222	0.348837
								Core SNP	c00636	group_1894-synonymous	0	2.22222	0.348837
								Core SNP	c02110	ompH-non-synonymous (G283V)	0	2.22222	0.348837
								Core SNP	c02091	nagC-non-synonymous (I170N)	0	2.22222	0.348837
								Core SNP	c02130	pdxB-synonymous	0	2.22222	0.348837
								Core SNP	c02131	pdxJ-non-synonymous (Q169L)	0	2.22222	0.348837
								Core SNP	c02089	nadB-synonymous	0	2.22222	0.348837
								Core SNP	c00519	group_135-synonymous	0	2.22222	0.348837
								Core SNP	c00518	group_135-synonymous	0	2.22222	0.348837
								Core SNP	c00517	group_135-non-synonymous (R254*)	0	2.22222	0.348837
								Core SNP	c00516	group_135-non-synonymous (G253K)	0	2.22222	0.348837
								Core SNP	c00515	group_135-non-synonymous (I252F)	0	2.22222	0.348837
								Core SNP	c00514	group_135-non-synonymous (S251E)	0	2.22222	0.348837
								Core SNP	c00513	group_135-non-synonymous (I250P)	0	2.22222	0.348837
								Core SNP	c00512	group_135-non-synonymous (K249I)	0	2.22222	0.348837
								Core SNP	c00511	group_135-non-synonymous (S248L)	0	2.22222	0.348837
								Core SNP	c00510	group_135-synonymous	0	2.22222	0.348837
								Core SNP	c00509	group_135-non-synonymous (N246P)	0	2.22222	0.348837
								Core SNP	c00507	group_135-non-synonymous (T245I)	0	2.22222	0.348837
								Core SNP	c00506	group_135-non-synonymous (L244V)	0	2.22222	0.348837
								Core SNP	c01163	group_2099-synonymous	0	2.22222	0.348837
								Core SNP	c01166	group_226-synonymous	0	2.22222	0.348837
								Core SNP	c01167	group_226-synonymous	0	2.22222	0.348837
								Core SNP	c01168	group_226-synonymous	0	2.22222	0.348837
								Core SNP	c01169	group_226-non-synonymous (T195L)	0	2.22222	0.348837
								Core SNP	c01170	group_226-non-synonymous (Y196L)	0	2.22222	0.348837
								Core SNP	c01171	group_226-non-synonymous (K197R)	0	2.22222	0.348837
								Core SNP	c01172	group_226-non-synonymous (V198N)	0	2.22222	0.348837
								Core SNP	c01173	group_226-non-synonymous (L199S)	0	2.22222	0.348837
								Core SNP	c01174	group_226-non-synonymous (K200D)	0	2.22222	0.348837
								Core SNP	c01176	group_226-non-synonymous (D202K)	0	2.22222	0.348837
								Core SNP	c02139	pglF-non-synonymous (F507P)	0	2.22222	0.348837
								Core SNP	c01205	group_234-non-synonymous (T177K)	0	2.22222	0.348837
								Core SNP	c02141	pglF-non-synonymous (D510I)	0	2.22222	0.348837
								Core SNP	c02176	prfC-synonymous	0	2.22222	0.348837
								Core SNP	c02185	ptsI-synonymous	0	2.22222	0.348837
								Core SNP	c02162	prfC-non-synonymous (N3T)	0	2.22222	0.348837
								Core SNP	c02184	prfC-synonymous	0	2.22222	0.348837
								Core SNP	c02183	prfC-synonymous	0	2.22222	0.348837
								Core SNP	c02163	prfC-non-synonymous (Q4T)	0	2.22222	0.348837
								Core SNP	c02164	prfC-non-synonymous (D5P)	0	2.22222	0.348837
								Core SNP	c02165	prfC-non-synonymous (F6Y)	0	2.22222	0.348837
								Core SNP	c00589	group_150-non-synonymous (L82F)	0	2.22222	0.348837
								Core SNP	c02182	prfC-synonymous	0	2.22222	0.348837
								Core SNP	c02166	prfC-non-synonymous (L7F)	0	2.22222	0.348837
								Core SNP	c02181	prfC-synonymous	0	2.22222	0.348837
								Core SNP	c02167	prfC-non-synonymous (N8G)	0	2.22222	0.348837
								Core SNP	c02140	pglF-non-synonymous (V508Q)	0	2.22222	0.348837
								Core SNP	c02168	prfC-non-synonymous (I10V)	0	2.22222	0.348837
								Core SNP	c02180	prfC-synonymous	0	2.22222	0.348837
								Core SNP	c02169	prfC-non-synonymous (N11S)	0	2.22222	0.348837
								Core SNP	c02170	prfC-synonymous	0	2.22222	0.348837
								Core SNP	c02171	prfC-synonymous	0	2.22222	0.348837
								Core SNP	c02172	prfC-synonymous	0	2.22222	0.348837
								Core SNP	c02179	prfC-synonymous	0	2.22222	0.348837
								Core SNP	c02173	prfC-synonymous	0	2.22222	0.348837
								Core SNP	c02174	prfC-synonymous	0	2.22222	0.348837
								Core SNP	c02178	prfC-synonymous	0	2.22222	0.348837
								Core SNP	c02175	prfC-synonymous	0	2.22222	0.348837
								Core SNP	c02161	prfC-non-synonymous (A2S)	0	2.22222	0.348837
								Core SNP	c02160	prfC-synonymous	0	2.22222	0.348837
								Core SNP	c02177	prfC-synonymous	0	2.22222	0.348837
								Core SNP	c02149	pglF-synonymous	0	2.22222	0.348837
								Core SNP	c02142	pglF-non-synonymous (M511P)	0	2.22222	0.348837
								Core SNP	c02143	pglF-non-synonymous (G512E)	0	2.22222	0.348837
								Core SNP	c02144	pglF-non-synonymous (E513F)	0	2.22222	0.348837
								Core SNP	c02151	pglF-synonymous	0	2.22222	0.348837
								Core SNP	c02145	pglF-non-synonymous (P514K)	0	2.22222	0.348837
								Core SNP	c02146	pglF-synonymous	0	2.22222	0.348837
								Core SNP	c02148	pglF-synonymous	0	2.22222	0.348837
								Core SNP	c02154	phnR-synonymous	0	2.22222	0.348837
								Core SNP	c02157	pnuC-synonymous	0	2.22222	0.348837
								Core SNP	c02147	pglF-synonymous	0	2.22222	0.348837
								Core SNP	c01882	hutI-non-synonymous (C53Y)	15.4762	8.88889	0.414617
								Core SNP	c02058	mutS-synonymous	2.38095	0	0.542151
								Core SNP	c02367	vspR-non-synonymous (R104V)	2.38095	0	0.542151
								Core SNP	c02059	mutS-synonymous	2.38095	0	0.542151
								Core SNP	c01524	group_4283-synonymous	2.38095	0	0.542151
								Core SNP	c02054	mutS-synonymous	2.38095	0	0.542151
								Core SNP	c02104	nlpD-non-synonymous (I218N)	2.38095	0	0.542151
								Core SNP	c02055	mutS-synonymous	2.38095	0	0.542151
								Core SNP	c02057	mutS-synonymous	2.38095	0	0.542151
								Core SNP	c02366	vspR-non-synonymous (E103V)	2.38095	0	0.542151
								Core SNP	c02102	nlpD-non-synonymous (I216T)	2.38095	0	0.542151
								Core SNP	c02056	mutS-synonymous	2.38095	0	0.542151
								Core SNP	c02101	nlpD-non-synonymous (G215S)	2.38095	0	0.542151
								Core SNP	c01554	group_4412-non-synonymous (N282S)	2.38095	0	0.542151
								Core SNP	c01534	group_4314-non-synonymous (V5E)	2.38095	0	0.542151
								Core SNP	c02100	nlpD-non-synonymous (K214C)	2.38095	0	0.542151
								Core SNP	c01536	group_4342-non-synonymous (G164D)	2.38095	0	0.542151
								Core SNP	c02099	nlpD-non-synonymous (N213F)	2.38095	0	0.542151
								Core SNP	c02098	nlpD-non-synonymous (G212R)	2.38095	0	0.542151
								Core SNP	c02094	nlpD-synonymous	2.38095	0	0.542151
								Core SNP	c02097	nlpD-non-synonymous (Q211A)	2.38095	0	0.542151
								Core SNP	c02096	nlpD-non-synonymous (D210S)	2.38095	0	0.542151
								Core SNP	c02095	nlpD-non-synonymous (G209R)	2.38095	0	0.542151
								Core SNP	c02103	nlpD-non-synonymous (D217S)	2.38095	0	0.542151
								Core SNP	c02368	vspR-non-synonymous (N105V)	2.38095	0	0.542151
								Core SNP	c02062	mutS-synonymous	2.38095	0	0.542151
								Core SNP	c01559	group_4421-non-synonymous (E31L)	2.38095	0	0.542151
								Core SNP	c02077	mutS-synonymous	2.38095	0	0.542151
								Core SNP	c02078	mutS-synonymous	2.38095	0	0.542151
								Core SNP	c02079	mutS-synonymous	2.38095	0	0.542151
								Core SNP	c02080	mutS-synonymous	2.38095	0	0.542151
								Core SNP	c02081	mutS-synonymous	2.38095	0	0.542151
								Core SNP	c02082	mutS-synonymous	2.38095	0	0.542151
								Core SNP	c02076	mutS-synonymous	2.38095	0	0.542151
								Core SNP	c02075	mutS-synonymous	2.38095	0	0.542151
								Core SNP	c02074	mutS-synonymous	2.38095	0	0.542151
								Core SNP	c02083	mutS-synonymous	2.38095	0	0.542151
								Core SNP	c02073	mutS-synonymous	2.38095	0	0.542151
								Core SNP	c02084	mutS-synonymous	2.38095	0	0.542151
								Core SNP	c02085	mutS-synonymous	2.38095	0	0.542151
								Core SNP	c02371	vspR-synonymous	2.38095	0	0.542151
								Core SNP	c02088	mutS-synonymous	2.38095	0	0.542151
								Core SNP	c02370	vspR-synonymous	2.38095	0	0.542151
								Core SNP	c02087	mutS-synonymous	2.38095	0	0.542151
								Core SNP	c02072	mutS-synonymous	2.38095	0	0.542151
								Core SNP	c02071	mutS-synonymous	2.38095	0	0.542151
								Core SNP	c02070	mutS-synonymous	2.38095	0	0.542151
								Core SNP	c02069	mutS-synonymous	2.38095	0	0.542151
								Core SNP	c02068	mutS-synonymous	2.38095	0	0.542151
								Core SNP	c02067	mutS-synonymous	2.38095	0	0.542151
								Core SNP	c02066	mutS-synonymous	2.38095	0	0.542151
								Core SNP	c02065	mutS-synonymous	2.38095	0	0.542151
								Core SNP	c02064	mutS-synonymous	2.38095	0	0.542151
								Core SNP	c02063	mutS-synonymous	2.38095	0	0.542151
								Core SNP	c02061	mutS-synonymous	2.38095	0	0.542151
								Core SNP	c02060	mutS-synonymous	2.38095	0	0.542151
								Core SNP	c02369	vspR-non-synonymous (Q106N)	2.38095	0	0.542151
								Core SNP	c02086	mutS-synonymous	2.38095	0	0.542151
								Core SNP	c02020	mutS-synonymous	2.38095	0	0.542151
								Core SNP	c02030	mutS-synonymous	2.38095	0	0.542151
								Core SNP	c01195	group_227-synonymous	2.38095	0	0.542151
								Core SNP	c02158	ppaC-non-synonymous (H274D)	2.38095	0	0.542151
								Core SNP	c02043	mutS-synonymous	2.38095	0	0.542151
								Core SNP	c00356	dsdX-non-synonymous (A196V)	2.38095	0	0.542151
								Core SNP	c00370	gcdB-synonymous	2.38095	0	0.542151
								Core SNP	c02044	mutS-synonymous	2.38095	0	0.542151
								Core SNP	c00374	glpA-non-synonymous (L281Q)	2.38095	0	0.542151
								Core SNP	c01210	group_2488-synonymous	2.38095	0	0.542151
								Core SNP	c02016	mutS-synonymous	2.38095	0	0.542151
								Core SNP	c02017	mutS-synonymous	2.38095	0	0.542151
								Core SNP	c02045	mutS-synonymous	2.38095	0	0.542151
								Core SNP	c01197	group_227-synonymous	2.38095	0	0.542151
								Core SNP	c01196	group_227-non-synonymous (I132*))	2.38095	0	0.542151
								Core SNP	c01520	group_4277-synonymous	2.38095	0	0.542151
								Core SNP	c01194	group_227-non-synonymous (K131A)	2.38095	0	0.542151
								Core SNP	c01193	group_227-non-synonymous (L130V)	2.38095	0	0.542151
								Core SNP	c00249	carA-synonymous	2.38095	0	0.542151
								Core SNP	c01192	group_227-non-synonymous (E129V)	2.38095	0	0.542151
								Core SNP	c02042	mutS-synonymous	2.38095	0	0.542151
								Core SNP	c02040	mutS-synonymous	2.38095	0	0.542151
								Core SNP	c02028	mutS-synonymous	2.38095	0	0.542151
								Core SNP	c02031	mutS-synonymous	2.38095	0	0.542151
								Core SNP	c02032	mutS-synonymous	2.38095	0	0.542151
								Core SNP	c02027	mutS-synonymous	2.38095	0	0.542151
								Core SNP	c02205	rpsG-non-synonymous (V27A)	2.38095	0	0.542151
								Core SNP	c02026	mutS-synonymous	2.38095	0	0.542151
								Core SNP	c02033	mutS-synonymous	2.38095	0	0.542151
								Core SNP	c02034	mutS-synonymous	2.38095	0	0.542151
								Core SNP	c02225	sasA_4-synonymous	2.38095	0	0.542151
								Core SNP	c02035	mutS-synonymous	2.38095	0	0.542151
								Core SNP	c02230	sgrR_1-non-synonymous (A285V)	2.38095	0	0.542151
								Core SNP	c02036	mutS-synonymous	2.38095	0	0.542151
								Core SNP	c02037	mutS-synonymous	2.38095	0	0.542151
								Core SNP	c02038	mutS-synonymous	2.38095	0	0.542151
								Core SNP	c02039	mutS-synonymous	2.38095	0	0.542151
								Core SNP	c02041	mutS-synonymous	2.38095	0	0.542151
								Core SNP	c01162	group_2086-non-synonymous (F81L)	2.38095	0	0.542151
								Core SNP	c02053	mutS-synonymous	2.38095	0	0.542151
								Core SNP	c02048	mutS-synonymous	2.38095	0	0.542151
								Core SNP	c02050	mutS-synonymous	2.38095	0	0.542151
								Core SNP	c02051	mutS-synonymous	2.38095	0	0.542151
								Core SNP	c02023	mutS-synonymous	2.38095	0	0.542151
								Core SNP	c01905	leuO_2-synonymous	2.38095	0	0.542151
								Core SNP	c02022	mutS-synonymous	2.38095	0	0.542151
								Core SNP	c02024	mutS-synonymous	2.38095	0	0.542151
								Core SNP	c01956	murQ_2-synonymous	2.38095	0	0.542151
								Core SNP	c00635	group_1663-synonymous	2.38095	0	0.542151
								Core SNP	c01902	kefC-non-synonymous (F205L)	2.38095	0	0.542151
								Core SNP	c02025	mutS-synonymous	2.38095	0	0.542151
								Core SNP	c02047	mutS-synonymous	2.38095	0	0.542151
								Core SNP	c02029	mutS-synonymous	2.38095	0	0.542151
								Core SNP	c02046	mutS-synonymous	2.38095	0	0.542151
								Core SNP	c02021	mutS-synonymous	2.38095	0	0.542151
								Core SNP	c02052	mutS-synonymous	2.38095	0	0.542151
								Core SNP	c01904	leuO_2-non-synonymous (D107V)	2.38095	0	0.542151
								Core SNP	c02049	mutS-synonymous	2.38095	0	0.542151
								Core SNP	c01584	group_4480-non-synonymous (T138A)	3.57143	0	0.551164
								Core SNP	c00301	dctB-non-synonymous (R340H)	3.57143	0	0.551164
								Core SNP	c02347	tufB-synonymous	20.2381	24.4444	0.655615
								Core SNP	c01906	leuO_2-non-synonymous (V109G)	1.19048	0	1
								Core SNP	c01876	hslO-synonymous	1.19048	0	1
								Core SNP	c01895	hutI-synonymous	1.19048	2.22222	1
								Core SNP	c01916	luxO_1-non-synonymous (L104R)	2.38095	2.22222	1
								Core SNP	c01894	hutI-synonymous	2.38095	2.22222	1
								Core SNP	c01908	lly-non-synonymous (A63V)	1.19048	0	1
								Core SNP	c01896	hutI-synonymous	1.19048	2.22222	1
								Core SNP	c01897	ilvE-synonymous	1.19048	0	1
								Core SNP	c01920	malQ-non-synonymous (I140N)	1.19048	0	1
								Core SNP	c01915	luxO_1-non-synonymous (R103L)	2.38095	2.22222	1
								Core SNP	c01909	lpdA-non-synonymous (M252V)	1.19048	0	1
								Core SNP	c01914	luxO_1-non-synonymous (P98L)	2.38095	2.22222	1
								Core SNP	c01893	hutI-synonymous	2.38095	2.22222	1
								Core SNP	c01875	hslO-synonymous	1.19048	0	1
								Core SNP	c01886	hutI-non-synonymous (L57F)	3.57143	2.22222	1
								Core SNP	c01884	hutI-non-synonymous (G55V)	3.57143	2.22222	1
								Core SNP	c01883	hutI-synonymous	3.57143	2.22222	1
								Core SNP	c01887	hutI-synonymous	2.38095	2.22222	1
								Core SNP	c01888	hutI-non-synonymous (V58F)	3.57143	2.22222	1
								Core SNP	c01881	hslO-synonymous	1.19048	0	1
								Core SNP	c01910	lpoA-non-synonymous (A24V)	1.19048	0	1
								Core SNP	c01889	hutI-non-synonymous (T59K)	3.57143	2.22222	1
								Core SNP	c01890	hutI-non-synonymous (P60Q)	2.38095	2.22222	1
								Core SNP	c01891	hutI-non-synonymous (G61K)	2.38095	2.22222	1
								Core SNP	c01879	hslO-synonymous	1.19048	0	1
								Core SNP	c01878	hslO-synonymous	1.19048	0	1
								Core SNP	c01892	hutI-synonymous	1.19048	2.22222	1
								Core SNP	c01877	hslO-synonymous	1.19048	0	1
								Core SNP	c01885	hutI-non-synonymous (K56F)	3.57143	2.22222	1
								Core SNP	c01880	hslO-synonymous	1.19048	0	1
								Core SNP	c01804	hslO-synonymous	1.19048	0	1
								Core SNP	c02190	rcsC_11-synonymous	1.19048	2.22222	1
								Core SNP	c01873	hslO-synonymous	1.19048	0	1
								Core SNP	c01835	hslO-synonymous	1.19048	0	1
								Core SNP	c01834	hslO-synonymous	1.19048	0	1
								Core SNP	c01833	hslO-synonymous	1.19048	0	1
								Core SNP	c01832	hslO-synonymous	1.19048	0	1
								Core SNP	c01831	hslO-synonymous	1.19048	0	1
								Core SNP	c01830	hslO-synonymous	1.19048	0	1
								Core SNP	c01829	hslO-synonymous	1.19048	0	1
								Core SNP	c01828	hslO-synonymous	1.19048	0	1
								Core SNP	c01827	hslO-synonymous	1.19048	0	1
								Core SNP	c01826	hslO-synonymous	1.19048	0	1
								Core SNP	c01825	hslO-synonymous	1.19048	0	1
								Core SNP	c01824	hslO-synonymous	1.19048	0	1
								Core SNP	c01823	hslO-synonymous	1.19048	0	1
								Core SNP	c01822	hslO-synonymous	1.19048	0	1
								Core SNP	c01821	hslO-synonymous	1.19048	0	1
								Core SNP	c01820	hslO-synonymous	1.19048	0	1
								Core SNP	c01819	hslO-synonymous	1.19048	0	1
								Core SNP	c01805	hslO-synonymous	1.19048	0	1
								Core SNP	c01806	hslO-synonymous	1.19048	0	1
								Core SNP	c01807	hslO-synonymous	1.19048	0	1
								Core SNP	c01808	hslO-synonymous	1.19048	0	1
								Core SNP	c01809	hslO-synonymous	1.19048	0	1
								Core SNP	c01810	hslO-synonymous	1.19048	0	1
								Core SNP	c01836	hslO-synonymous	1.19048	0	1
								Core SNP	c01811	hslO-synonymous	1.19048	0	1
								Core SNP	c01813	hslO-synonymous	1.19048	0	1
								Core SNP	c01814	hslO-synonymous	1.19048	0	1
								Core SNP	c01815	hslO-synonymous	1.19048	0	1
								Core SNP	c01816	hslO-synonymous	1.19048	0	1
								Core SNP	c01817	hslO-synonymous	1.19048	0	1
								Core SNP	c01818	hslO-synonymous	1.19048	0	1
								Core SNP	c01812	hslO-synonymous	1.19048	0	1
								Core SNP	c01837	hslO-synonymous	1.19048	0	1
								Core SNP	c01838	hslO-synonymous	1.19048	0	1
								Core SNP	c01839	hslO-synonymous	1.19048	0	1
								Core SNP	c01859	hslO-synonymous	1.19048	0	1
								Core SNP	c01860	hslO-synonymous	1.19048	0	1
								Core SNP	c01861	hslO-synonymous	1.19048	0	1
								Core SNP	c01862	hslO-synonymous	1.19048	0	1
								Core SNP	c01863	hslO-synonymous	1.19048	0	1
								Core SNP	c01864	hslO-synonymous	1.19048	0	1
								Core SNP	c01858	hslO-synonymous	1.19048	0	1
								Core SNP	c01865	hslO-synonymous	1.19048	0	1
								Core SNP	c01867	hslO-synonymous	1.19048	0	1
								Core SNP	c01868	hslO-synonymous	1.19048	0	1
								Core SNP	c01869	hslO-synonymous	1.19048	0	1
								Core SNP	c01870	hslO-synonymous	1.19048	0	1
								Core SNP	c01871	hslO-synonymous	1.19048	0	1
								Core SNP	c01872	hslO-synonymous	1.19048	0	1
								Core SNP	c01866	hslO-synonymous	1.19048	0	1
								Core SNP	c01874	hslO-synonymous	1.19048	0	1
								Core SNP	c01857	hslO-synonymous	1.19048	0	1
								Core SNP	c01855	hslO-synonymous	1.19048	0	1
								Core SNP	c01840	hslO-synonymous	1.19048	0	1
								Core SNP	c01841	hslO-synonymous	1.19048	0	1
								Core SNP	c01842	hslO-synonymous	1.19048	0	1
								Core SNP	c01843	hslO-synonymous	1.19048	0	1
								Core SNP	c01844	hslO-synonymous	1.19048	0	1
								Core SNP	c01845	hslO-synonymous	1.19048	0	1
								Core SNP	c01856	hslO-synonymous	1.19048	0	1
								Core SNP	c01846	hslO-synonymous	1.19048	0	1
								Core SNP	c01849	hslO-synonymous	1.19048	0	1
								Core SNP	c01850	hslO-synonymous	1.19048	0	1
								Core SNP	c01851	hslO-synonymous	1.19048	0	1
								Core SNP	c01852	hslO-synonymous	1.19048	0	1
								Core SNP	c01853	hslO-synonymous	1.19048	0	1
								Core SNP	c01854	hslO-synonymous	1.19048	0	1
								Core SNP	c01847	hslO-synonymous	1.19048	0	1
								Core SNP	c01848	hslO-synonymous	1.19048	0	1
								Core SNP	c01998	mutS-non-synonymous (I618P)	1.19048	0	1
								Core SNP	c01924	malT_1-non-synonymous (A653T)	1.19048	0	1
								Core SNP	c02013	mutS-synonymous	1.19048	0	1
								Core SNP	c02124	pcm-non-synonymous (P137N)	1.19048	0	1
								Core SNP	c02012	mutS-synonymous	1.19048	0	1
								Core SNP	c02123	pcm-non-synonymous (W136F)	1.19048	0	1
								Core SNP	c02122	pcm-non-synonymous (G135M)	1.19048	0	1
								Core SNP	c02121	pcm-non-synonymous (Q134T)	1.19048	0	1
								Core SNP	c02354	ugpA-synonymous	1.19048	0	1
								Core SNP	c02120	pcm-non-synonymous (W133I)	1.19048	0	1
								Core SNP	c02355	uhpC_1-non-synonymous (S387P)	1.19048	0	1
								Core SNP	c02119	pcm-non-synonymous (G132A)	1.19048	0	1
								Core SNP	c02356	uvrA-synonymous	1.19048	0	1
								Core SNP	c02118	pcm-synonymous	1.19048	0	1
								Core SNP	c02125	pcm-non-synonymous (A138R)	1.19048	0	1
								Core SNP	c02357	uvrY-non-synonymous (R44L)	1.19048	0	1
								Core SNP	c02115	oppA-non-synonymous (Y218T)	1.19048	0	1
								Core SNP	c02114	oppA-non-synonymous (A217L)	1.19048	0	1
								Core SNP	c02113	oppA-non-synonymous (G216V)	1.19048	0	1
								Core SNP	c02109	ompH-non-synonymous (D111G)	1.19048	0	1
								Core SNP	c02107	ntrC-synonymous	1.19048	0	1
								Core SNP	c02106	ntrC-non-synonymous (L249P)	1.19048	0	1
								Core SNP	c02010	mutS-synonymous	1.19048	0	1
								Core SNP	c02009	mutS-synonymous	1.19048	0	1
								Core SNP	c02008	mutS-synonymous	1.19048	0	1
								Core SNP	c02364	vgrG1_2-synonymous	1.19048	0	1
								Core SNP	c02365	vioB-synonymous	1.19048	0	1
								Core SNP	c02007	mutS-non-synonymous (T633*)	1.19048	0	1
								Core SNP	c02011	mutS-synonymous	1.19048	0	1
								Core SNP	c02093	nhaR_1-non-synonymous (S120L)	1.19048	0	1
								Core SNP	c02014	mutS-synonymous	1.19048	0	1
								Core SNP	c02127	pcm-non-synonymous (R139I)	1.19048	0	1
								Core SNP	c02193	recN-non-synonymous (R285H)	1.19048	0	1
								Core SNP	c02186	purL-synonymous	1.19048	0	1
								Core SNP	c02200	rodZ-non-synonymous (A257V)	1.19048	0	1
								Core SNP	c02201	rpoB-non-synonymous (D516V)	1.19048	0	1
								Core SNP	c02203	rpoC-non-synonymous (Y46N)	1.19048	0	1
								Core SNP	c02217	rsmJ-non-synonymous (D399E)	1.19048	0	1
								Core SNP	c02221	rtxA-synonymous	1.19048	0	1
								Core SNP	c02222	rtxA-synonymous	1.19048	0	1
								Core SNP	c02226	sasA_7-non-synonymous (T504I)	1.19048	0	1
								Core SNP	c02228	sdhC-synonymous	1.19048	0	1
								Core SNP	c02229	sdhC-synonymous	1.19048	0	1
								Core SNP	c02234	sucB-synonymous	1.19048	0	1
								Core SNP	c02126	pcm-synonymous	1.19048	0	1
								Core SNP	c02240	tktA_1-non-synonymous (M130V)	1.19048	2.22222	1
								Core SNP	c02243	toxS-synonymous	2.38095	2.22222	1
								Core SNP	c02244	toxS-synonymous	2.38095	2.22222	1
								Core SNP	c02245	toxS-non-synonymous (S120*)	1.19048	0	1
								Core SNP	c02159	pqiB-synonymous	1.19048	0	1
								Core SNP	c02156	plsB-non-synonymous (R141S)	1.19048	0	1
								Core SNP	c02015	mutS-synonymous	1.19048	0	1
								Core SNP	c02018	mutS-synonymous	1.19048	0	1
								Core SNP	c02019	mutS-synonymous	1.19048	0	1
								Core SNP	c02134	pglF-synonymous	1.19048	0	1
								Core SNP	c02133	pfkA-non-synonymous (A259T)	1.19048	0	1
								Core SNP	c02343	treA-non-synonymous (V64I)	1.19048	0	1
								Core SNP	c02128	pcm-synonymous	1.19048	0	1
								Core SNP	c02241	tktA_1-synonymous	1.19048	2.22222	1
								Core SNP	c01922	malT_1-non-synonymous (A478V)	1.19048	0	1
								Core SNP	c02006	mutS-non-synonymous (Q632V)	1.19048	0	1
								Core SNP	c02004	mutS-non-synonymous (M630V)	1.19048	0	1
								Core SNP	c01973	mutS-non-synonymous (R575L)	1.19048	0	1
								Core SNP	c01972	mutS-non-synonymous (C574T)	1.19048	0	1
								Core SNP	c01971	mutS-non-synonymous (Y573M)	1.19048	0	1
								Core SNP	c01970	mutS-non-synonymous (E572F)	1.19048	0	1
								Core SNP	c01969	mutS-non-synonymous (L571F)	1.19048	0	1
								Core SNP	c01968	mutS-non-synonymous (N570K)	1.19048	0	1
								Core SNP	c01967	mutS-synonymous	1.19048	0	1
								Core SNP	c01966	mutS-synonymous	1.19048	0	1
								Core SNP	c01965	mutS-synonymous	1.19048	0	1
								Core SNP	c01964	mutS-synonymous	1.19048	0	1
								Core SNP	c01963	mutS-synonymous	1.19048	0	1
								Core SNP	c01962	mutS-synonymous	1.19048	0	1
								Core SNP	c01974	mutS-non-synonymous (T577F)	1.19048	0	1
								Core SNP	c01961	mutS-synonymous	1.19048	0	1
								Core SNP	c01959	mutS-synonymous	1.19048	0	1
								Core SNP	c01958	mutS-synonymous	1.19048	0	1
								Core SNP	c01952	mreD-non-synonymous (L22F)	1.19048	0	1
								Core SNP	c01950	mreB-non-synonymous (P430S)	1.19048	0	1
								Core SNP	c01949	moaC-non-synonymous (A119S)	1.19048	0	1
								Core SNP	c01946	mglC-synonymous	1.19048	0	1
								Core SNP	c01935	menF-non-synonymous (P430S)	1.19048	0	1
								Core SNP	c01934	menD-synonymous	1.19048	2.22222	1
								Core SNP	c01930	mcpP_1-synonymous	1.19048	0	1
								Core SNP	c01929	mcpP_1-synonymous	1.19048	0	1
								Core SNP	c02377	ygiF-non-synonymous (R504C)	1.19048	0	1
								Core SNP	c01925	manC1-non-synonymous (T141I)	1.19048	0	1
								Core SNP	c01960	mutS-synonymous	1.19048	0	1
								Core SNP	c02005	mutS-non-synonymous (R631F)	1.19048	0	1
								Core SNP	c01975	mutS-non-synonymous (L578V)	1.19048	0	1
								Core SNP	c01977	mutS-non-synonymous (Q580H)	1.19048	0	1
								Core SNP	c02003	mutS-non-synonymous (Y629F)	1.19048	0	1
								Core SNP	c02002	mutS-non-synonymous (T628S)	1.19048	0	1
								Core SNP	c02001	mutS-non-synonymous (S627Y)	1.19048	0	1
								Core SNP	c02000	mutS-non-synonymous (K626T)	1.19048	0	1
								Core SNP	c01999	mutS-non-synonymous (G625S)	1.19048	0	1
								Core SNP	c02372	xseA-synonymous	1.19048	0	1
								Core SNP	c01997	mutS-non-synonymous (I617L)	1.19048	0	1
								Core SNP	c01996	mutS-non-synonymous (L616C)	1.19048	0	1
								Core SNP	c01995	mutS-non-synonymous (M615F)	1.19048	0	1
								Core SNP	c01994	mutS-non-synonymous (E608T)	1.19048	0	1
								Core SNP	c01993	mutS-non-synonymous (I607L)	1.19048	0	1
								Core SNP	c01992	mutS-non-synonymous (P606T)	1.19048	0	1
								Core SNP	c01976	mutS-non-synonymous (V579G)	1.19048	0	1
								Core SNP	c01991	mutS-non-synonymous (N605L)	1.19048	0	1
								Core SNP	c01989	mutS-non-synonymous (I603A)	1.19048	0	1
								Core SNP	c01988	mutS-non-synonymous (P601A)	1.19048	0	1
								Core SNP	c01987	mutS-non-synonymous (E600L)	1.19048	0	1
								Core SNP	c01986	mutS-non-synonymous (H591G)	1.19048	0	1
								Core SNP	c01985	mutS-non-synonymous (R590E)	1.19048	0	1
								Core SNP	c01984	mutS-non-synonymous (G589S)	1.19048	0	1
								Core SNP	c01983	mutS-non-synonymous (G588S)	1.19048	0	1
								Core SNP	c01982	mutS-non-synonymous (Q587F)	1.19048	0	1
								Core SNP	c01981	mutS-non-synonymous (H585A)	1.19048	0	1
								Core SNP	c01980	mutS-non-synonymous (I584F)	1.19048	0	1
								Core SNP	c01979	mutS-non-synonymous (A582H)	1.19048	0	1
								Core SNP	c01978	mutS-non-synonymous (E581S)	1.19048	0	1
								Core SNP	c01990	mutS-non-synonymous (A604T)	1.19048	0	1
								Core SNP	c01803	hslO-synonymous	1.19048	0	1
								Core SNP	c00001	aceF-non-synonymous (A252T)	1.19048	0	1
								Core SNP	c01801	hslO-synonymous	1.19048	0	1
								Core SNP	c00221	can-synonymous	1.19048	2.22222	1
								Core SNP	c00220	can-synonymous	1.19048	2.22222	1
								Core SNP	c00219	can-synonymous	1.19048	2.22222	1
								Core SNP	c00218	can-synonymous	1.19048	2.22222	1
								Core SNP	c00217	can-synonymous	1.19048	2.22222	1
								Core SNP	c00216	can-synonymous	1.19048	2.22222	1
								Core SNP	c00222	can-non-synonymous (I265L)	1.19048	2.22222	1
								Core SNP	c00215	can-synonymous	1.19048	2.22222	1
								Core SNP	c00213	can-synonymous	1.19048	2.22222	1
								Core SNP	c00212	can-synonymous	1.19048	2.22222	1
								Core SNP	c00211	can-synonymous	1.19048	2.22222	1
								Core SNP	c00210	can-synonymous	1.19048	2.22222	1
								Core SNP	c00209	can-synonymous	1.19048	2.22222	1
								Core SNP	c00208	can-synonymous	1.19048	2.22222	1
								Core SNP	c00214	can-synonymous	1.19048	2.22222	1
								Core SNP	c00207	can-synonymous	1.19048	2.22222	1
								Core SNP	c00223	can-non-synonymous (L266A)	1.19048	2.22222	1
								Core SNP	c00225	can-non-synonymous (P268S)	1.19048	2.22222	1
								Core SNP	c00239	can-synonymous	1.19048	2.22222	1
								Core SNP	c00238	can-synonymous	1.19048	2.22222	1
								Core SNP	c00237	can-synonymous	1.19048	2.22222	1
								Core SNP	c00236	can-synonymous	1.19048	2.22222	1
								Core SNP	c00235	can-synonymous	1.19048	2.22222	1
								Core SNP	c00234	can-synonymous	1.19048	2.22222	1
								Core SNP	c00224	can-non-synonymous (N267D)	1.19048	2.22222	1
								Core SNP	c00233	can-synonymous	1.19048	2.22222	1
								Core SNP	c00231	can-synonymous	1.19048	2.22222	1
								Core SNP	c00230	can-synonymous	1.19048	2.22222	1
								Core SNP	c00229	can-synonymous	1.19048	2.22222	1
								Core SNP	c00228	can-synonymous	1.19048	2.22222	1
								Core SNP	c00227	can-non-synonymous (H270L)	1.19048	2.22222	1
								Core SNP	c00226	can-non-synonymous (N269Y)	1.19048	2.22222	1
								Core SNP	c00232	can-synonymous	1.19048	2.22222	1
								Core SNP	c00240	can-synonymous	1.19048	2.22222	1
								Core SNP	c00206	can-synonymous	1.19048	2.22222	1
								Core SNP	c00204	can-non-synonymous (-262V)	1.19048	2.22222	1
								Core SNP	c00185	can-non-synonymous (-249I)	1.19048	2.22222	1
								Core SNP	c00184	can-non-synonymous (-248S)	1.19048	2.22222	1
								Core SNP	c00183	can-non-synonymous (E247Y)	1.19048	2.22222	1
								Core SNP	c00182	can-non-synonymous (L246F)	1.19048	2.22222	1
								Core SNP	c00181	can-non-synonymous (A245I)	1.19048	2.22222	1
								Core SNP	c00180	can-non-synonymous (K244G)	1.19048	2.22222	1
								Core SNP	c00186	can-non-synonymous (-250F)	1.19048	2.22222	1
								Core SNP	c00179	can-non-synonymous (Y242F)	1.19048	2.22222	1
								Core SNP	c00177	can-non-synonymous (D240S)	1.19048	2.22222	1
								Core SNP	c00176	can-non-synonymous (E239A)	1.19048	2.22222	1
								Core SNP	c00175	can-non-synonymous (V238M)	1.19048	2.22222	1
								Core SNP	c00174	can-non-synonymous (A237N)	1.19048	2.22222	1
								Core SNP	c00173	can-non-synonymous (-236D)	1.19048	2.22222	1
								Core SNP	c00172	can-non-synonymous (-235V)	1.19048	2.22222	1
								Core SNP	c00178	can-non-synonymous (N241L)	1.19048	2.22222	1
								Core SNP	c00205	can-non-synonymous (-263Y)	1.19048	2.22222	1
								Core SNP	c00187	can-synonymous	1.19048	2.22222	1
								Core SNP	c00189	can-synonymous	1.19048	2.22222	1
								Core SNP	c00203	can-non-synonymous (-261A)	1.19048	2.22222	1
								Core SNP	c00202	can-non-synonymous (-260E)	1.19048	2.22222	1
								Core SNP	c00201	can-non-synonymous (-259Q)	1.19048	2.22222	1
								Core SNP	c00200	can-non-synonymous (-258E)	1.19048	2.22222	1
								Core SNP	c00199	can-non-synonymous (-257G)	1.19048	2.22222	1
								Core SNP	c00198	can-non-synonymous (-256L)	1.19048	2.22222	1
								Core SNP	c00188	can-synonymous	1.19048	2.22222	1
								Core SNP	c00197	can-non-synonymous (-255R)	1.19048	2.22222	1
								Core SNP	c00195	can-non-synonymous (-253V)	1.19048	2.22222	1
								Core SNP	c00194	can-non-synonymous (-252Q)	1.19048	2.22222	1
								Core SNP	c00193	can-non-synonymous (-251L)	1.19048	2.22222	1
								Core SNP	c00192	can-synonymous	1.19048	2.22222	1
								Core SNP	c00191	can-synonymous	1.19048	2.22222	1
								Core SNP	c00190	can-synonymous	1.19048	2.22222	1
								Core SNP	c00196	can-non-synonymous (-254N)	1.19048	2.22222	1
								Core SNP	c00241	can-non-synonymous (R271N)	1.19048	2.22222	1
								Core SNP	c00242	can-non-synonymous (L272M)	1.19048	2.22222	1
								Core SNP	c00243	can-non-synonymous (R275I)	1.19048	2.22222	1
								Core SNP	c00541	group_14-non-synonymous (V737T)	98.8095	100	1
								Core SNP	c00540	group_14-non-synonymous (A735R)	98.8095	100	1
								Core SNP	c00539	group_14-non-synonymous (L734G)	98.8095	100	1
								Core SNP	c00538	group_14-non-synonymous (A733S)	98.8095	100	1
								Core SNP	c00537	group_14-non-synonymous (F731Y)	98.8095	100	1
								Core SNP	c00536	group_14-non-synonymous (A728T)	98.8095	100	1
								Core SNP	c00542	group_14-non-synonymous (S739T)	98.8095	100	1
								Core SNP	c00535	group_14-non-synonymous (A727F)	98.8095	100	1
								Core SNP	c00533	group_14-non-synonymous (A724E)	98.8095	100	1
								Core SNP	c00532	group_14-non-synonymous (K722A)	98.8095	100	1
								Core SNP	c00531	group_14-non-synonymous (A721E)	98.8095	100	1
								Core SNP	c00530	group_14-non-synonymous (T718S)	98.8095	100	1
								Core SNP	c00529	group_14-non-synonymous (I717V)	98.8095	100	1
								Core SNP	c00528	group_14-non-synonymous (V716N)	98.8095	100	1
								Core SNP	c00534	group_14-non-synonymous (E725K)	98.8095	100	1
								Core SNP	c00527	group_14-synonymous	98.8095	100	1
								Core SNP	c00543	group_14-non-synonymous (L740I)	98.8095	100	1
								Core SNP	c00545	group_14-non-synonymous (E746G)	98.8095	100	1
								Core SNP	c00559	group_14-synonymous	98.8095	100	1
								Core SNP	c00558	group_14-synonymous	98.8095	100	1
								Core SNP	c00557	group_14-non-synonymous (L767I)	98.8095	100	1
								Core SNP	c00556	group_14-non-synonymous (Q765T)	98.8095	100	1
								Core SNP	c00555	group_14-non-synonymous (K761T)	98.8095	100	1
								Core SNP	c00554	group_14-non-synonymous (T759E)	98.8095	100	1
								Core SNP	c00544	group_14-non-synonymous (V741T)	98.8095	100	1
								Core SNP	c00553	group_14-non-synonymous (D757T)	98.8095	100	1
								Core SNP	c00551	group_14-non-synonymous (K754T)	98.8095	100	1
								Core SNP	c00550	group_14-non-synonymous (V753D)	98.8095	100	1
								Core SNP	c00549	group_14-non-synonymous (G752A)	98.8095	100	1
								Core SNP	c00548	group_14-non-synonymous (L750S)	98.8095	100	1
								Core SNP	c00547	group_14-non-synonymous (A748D)	98.8095	100	1
								Core SNP	c00546	group_14-non-synonymous (D747T)	98.8095	100	1
								Core SNP	c00552	group_14-non-synonymous (T756D)	98.8095	100	1
								Core SNP	c00526	group_14-synonymous	98.8095	100	1
								Core SNP	c00525	group_14-synonymous	98.8095	100	1
								Core SNP	c00524	group_14-synonymous	98.8095	100	1
								Core SNP	c00289	cqsS-non-synonymous (D485V)	1.19048	0	1
								Core SNP	c00288	cqsS-non-synonymous (V483I)	1.19048	0	1
								Core SNP	c00287	cqsS-non-synonymous (Y482K)	1.19048	0	1
								Core SNP	c00286	cqsS-non-synonymous (I480S)	1.19048	0	1
								Core SNP	c00285	cqsS-non-synonymous (C479E)	1.19048	0	1
								Core SNP	c00256	clpX-non-synonymous (D3Y)	1.19048	0	1
								Core SNP	c00294	cysJ-synonymous	1.19048	0	1
								Core SNP	c00252	cheX-non-synonymous (G47C)	1.19048	0	1
								Core SNP	c00250	chb-non-synonymous (A545T)	1.19048	0	1
								Core SNP	c00248	can-synonymous	1.19048	2.22222	1
								Core SNP	c00247	can-non-synonymous (-279*)	1.19048	2.22222	1
								Core SNP	c00246	can-non-synonymous (-278N)	1.19048	2.22222	1
								Core SNP	c00245	can-non-synonymous (-277K)	1.19048	2.22222	1
								Core SNP	c00244	can-non-synonymous (*276Y)	1.19048	2.22222	1
								Core SNP	c00251	cheV_4-non-synonymous (D30Y)	1.19048	0	1
								Core SNP	c00295	cysT-non-synonymous (A122T)	1.19048	0	1
								Core SNP	c00298	dapF-synonymous	1.19048	0	1
								Core SNP	c00299	dctB-non-synonymous (L311R)	1.19048	0	1
								Core SNP	c00523	group_14-synonymous	98.8095	100	1
								Core SNP	c00522	group_14-synonymous	98.8095	100	1
								Core SNP	c00521	group_14-synonymous	98.8095	100	1
								Core SNP	c00520	group_14-synonymous	98.8095	100	1
								Core SNP	c00379	gntR_2-non-synonymous (Q318*)	1.19048	0	1
								Core SNP	c00373	glnE-synonymous	1.19048	0	1
								Core SNP	c00367	ftsW-non-synonymous (D55E)	1.19048	0	1
								Core SNP	c00361	exuR-non-synonymous (R314S)	1.19048	0	1
								Core SNP	c00308	der-non-synonymous (V295L)	1.19048	0	1
								Core SNP	c00306	dctD_2-non-synonymous (G141D)	1.19048	0	1
								Core SNP	c00305	dctB-non-synonymous (N386K)	1.19048	0	1
								Core SNP	c00304	dctB-synonymous	1.19048	0	1
								Core SNP	c00303	dctB-non-synonymous (A379V)	1.19048	0	1
								Core SNP	c00302	dctB-synonymous	1.19048	0	1
								Core SNP	c00300	dctB-non-synonymous (L325R)	1.19048	0	1
								Core SNP	c00171	can-synonymous	1.19048	2.22222	1
								Core SNP	c00560	group_14-synonymous	98.8095	100	1
								Core SNP	c00170	can-synonymous	1.19048	2.22222	1
								Core SNP	c00168	can-non-synonymous (-249I)	1.19048	2.22222	1
								Core SNP	c00076	can-non-synonymous (D144Q)	1.19048	2.22222	1
								Core SNP	c00075	can-non-synonymous (E143R)	1.19048	2.22222	1
								Core SNP	c00074	can-non-synonymous (-142V)	1.19048	2.22222	1
								Core SNP	c00073	can-non-synonymous (-141V)	1.19048	2.22222	1
								Core SNP	c00072	can-non-synonymous (-140F)	1.19048	2.22222	1
								Core SNP	c00071	can-non-synonymous (A139N)	1.19048	2.22222	1
								Core SNP	c00077	can-non-synonymous (R145Y)	1.19048	2.22222	1
								Core SNP	c00070	can-non-synonymous (P138L)	1.19048	2.22222	1
								Core SNP	c00068	can-non-synonymous (Q136D)	1.19048	2.22222	1
								Core SNP	c00067	can-non-synonymous (L134V)	1.19048	2.22222	1
								Core SNP	c00066	can-non-synonymous (Y133L)	1.19048	2.22222	1
								Core SNP	c00065	can-non-synonymous (E132D)	1.19048	2.22222	1
								Core SNP	c00064	can-non-synonymous (R131E)	1.19048	2.22222	1
								Core SNP	c00063	can-non-synonymous (H130R)	1.19048	2.22222	1
								Core SNP	c00069	can-non-synonymous (M137V)	1.19048	2.22222	1
								Core SNP	c00062	can-non-synonymous (K129T)	1.19048	2.22222	1
								Core SNP	c00078	can-non-synonymous (D147N)	1.19048	2.22222	1
								Core SNP	c00080	can-non-synonymous (-150T)	1.19048	2.22222	1
								Core SNP	c00094	can-non-synonymous (N165T)	1.19048	2.22222	1
								Core SNP	c00093	can-non-synonymous (Y164Q)	1.19048	2.22222	1
								Core SNP	c00092	can-non-synonymous (V163L)	1.19048	2.22222	1
								Core SNP	c00091	can-non-synonymous (Q162N)	1.19048	2.22222	1
								Core SNP	c00090	can-non-synonymous (E161T)	1.19048	2.22222	1
								Core SNP	c00089	can-non-synonymous (A160K)	1.19048	2.22222	1
								Core SNP	c00079	can-non-synonymous (K148F)	1.19048	2.22222	1
								Core SNP	c00088	can-non-synonymous (N158D)	1.19048	2.22222	1
								Core SNP	c00086	can-non-synonymous (E156D)	1.19048	2.22222	1
								Core SNP	c00085	can-non-synonymous (A155L)	1.19048	2.22222	1
								Core SNP	c00084	can-non-synonymous (-154D)	1.19048	2.22222	1
								Core SNP	c00083	can-non-synonymous (-153I)	1.19048	2.22222	1
								Core SNP	c00082	can-non-synonymous (-152H)	1.19048	2.22222	1
								Core SNP	c00081	can-non-synonymous (-151D)	1.19048	2.22222	1
								Core SNP	c00087	can-non-synonymous (I157L)	1.19048	2.22222	1
								Core SNP	c00095	can-non-synonymous (A167C)	1.19048	2.22222	1
								Core SNP	c00061	can-non-synonymous (L128P)	1.19048	2.22222	1
								Core SNP	c00059	can-non-synonymous (D125N)	1.19048	2.22222	1
								Core SNP	c00040	can-non-synonymous (T105A)	1.19048	2.22222	1
								Core SNP	c00039	can-non-synonymous (V104H)	1.19048	2.22222	1
								Core SNP	c00038	can-synonymous	1.19048	2.22222	1
								Core SNP	c00037	can-synonymous	1.19048	2.22222	1
								Core SNP	c00036	can-synonymous	1.19048	2.22222	1
								Core SNP	c00017	bdlA_1-synonymous	1.19048	0	1
								Core SNP	c00041	can-non-synonymous (A106D)	1.19048	2.22222	1
								Core SNP	c00016	barA-non-synonymous (H870Y)	1.19048	0	1
								Core SNP	c00013	atoC_1-non-synonymous (L409S)	1.19048	2.22222	1
								Core SNP	c00008	alr1-non-synonymous (G341V)	1.19048	0	1
								Core SNP	c00005	acp-non-synonymous (S313P)	1.19048	0	1
								Core SNP	c00004	acp-non-synonymous (V311A)	1.19048	0	1
								Core SNP	c00003	acp-non-synonymous (T308A)	1.19048	0	1
								Core SNP	c00002	acp-non-synonymous (I304N)	1.19048	0	1
[truncated: 384 more rows]
