# Supplementary material for: Signature genomic traits of the core and accessory genome of Vibrio Cholerae O1 drive lineage transmission and disease severity
Source: Research Square preprint supplement (doi:10.21203/rs.3.rs-4184222/v1), 2024-04-05
Supplement: Supplementary file 11 [file fb3f75c1fd7367ea25616247.xlsx]

## Sheet: V.cholerae
				V. cholerae PCR primers
				V. cholerae primer
		Primer	Sequence (5'-3')	Targeted gene	Annealing temperature	Amplicon size(bp)	Reference
		ompW F	CAC CAA GAA GGT GAC TTT ATT GTG	ompW	64 C	304	Nandi et al. (2000)
		ompW R	GGT TTG TCG AAT TAG CTT CAC C
		rfbO1 F	GTT TCA CTG AAC AGA TGG G	rfbO1	55 C	192	Hoshino et al. (1998)
		rfbO1 R	GGT CAT CTG TAA GTA CAA C
		rfbO139 F	AGC CTC TTT ATT ACG GGT GG	rfbO139	55 C	449	Hoshino et al. (1998)
		rfbO139 R	GTC AAA CCC GAT CGT AAA GG
		ctxA F	ACA GAG TGA GTA CTT TGA CC	ctxA	55 C	308	Hoshino et al. (1998)
		ctxA R	ATA CCA TCC ATA TAT TTG GGA G
